# Supplementary material for: Distinctive characters of Nostoc genomes in cyanolichens
Source: PubMed Central journal article supplement (PMC5987646; doi:10.1186/s12864-018-4743-5), 2018-06-05
Supplement: 12864_2018_4743_MOESM2_ESM.pdf [file 12864_2018_4743_MOESM2_ESM.pdf]

# Distinctive characters of *Nostoc* genomes in cyanolichens

Andrey N. Gagunashvili<sup>1</sup> & Ólafur S. Andr sson<sup>1</sup>

## Supporting Information (SI) Appendix

<sup>1</sup>*Faculty of Life and Environmental Sciences, University of Iceland, Sturlugata 7, 101 Reykjavik, Iceland*

## Table of Contents

|                              |                                                                                                                                                                                                                  |    |
|------------------------------|------------------------------------------------------------------------------------------------------------------------------------------------------------------------------------------------------------------|----|
| <b>Supplementary text S1</b> | Genome comparison . . . . .                                                                                                                                                                                      | 4  |
| <b>Supplementary text S2</b> | Comparison to minimal bacterial and cyanobacterial gene sets . . . . .                                                                                                                                           | 6  |
| <b>Supplementary text S3</b> | Identification of genes specific to symbiotic <i>Nostoc</i> strains                                                                                                                                              | 9  |
| <b>Supplementary text S4</b> | Secondary metabolites . . . . .                                                                                                                                                                                  | 14 |
| <b>Supplementary text S5</b> | Summary discussion . . . . .                                                                                                                                                                                     | 16 |
| <b>Figure S1</b>             | Nucleotide sequence alignment of the ends of the linear replicons from <i>Nostoc</i> sp. N6 . . . . .                                                                                                            | 19 |
| <b>Figure S2</b>             | Codon usage of genes encoded on the <i>Nostoc</i> sp. N6 chromosome and linear replicon pNPM8 . . . . .                                                                                                          | 20 |
| <b>Figure S3</b>             | Origins of replication of the <i>Nostoc</i> sp. N6 and <i>Nostoc</i> sp. ' <i>Lobaria pulmonaria</i> cyanobiont' chromosomes . . . . .                                                                           | 21 |
| <b>Figure S4</b>             | Dot plot comparisons of lichen-associated <i>Nostoc</i> strains and <i>N. punctiforme</i> . . . . .                                                                                                              | 22 |
| <b>Figure S5</b>             | Genome sequence alignment of lichen-associated <i>Nostoc</i> strains and <i>N. punctiforme</i> . . . . .                                                                                                         | 23 |
| <b>Figure S6</b>             | Multiple alignment of tRNA <sup>fMet</sup> genes from symbiotic <i>Nostoc</i> strains . .                                                                                                                        | 24 |
| <b>Figure S7</b>             | Reactions catalyzed by ThyA and ThyX thymidylate synthases . . . . .                                                                                                                                             | 25 |
| <b>Figure S8</b>             | Simplified scheme of pyrimidine metabolism (KEGG pathway 00240) . .                                                                                                                                              | 26 |
| <b>Figure S9</b>             | Arrangement of <i>nif</i> clusters in the <i>Nostoc</i> sp. N6 and <i>Nostoc</i> sp. ' <i>Lobaria pulmonaria</i> cyanobiont' genomes . . . . .                                                                   | 27 |
| <b>Figure S10</b>            | Arrangement of <i>vnf</i> clusters in <i>Nostoc</i> genomes . . . . .                                                                                                                                            | 28 |
| <b>Figure S11</b>            | Multiple nucleotide sequence alignment of introns intervening the ribonucleoside-diphosphate reductase <i>nrdJ</i> genes in selected <i>Nostoc</i> and <i>Anabaena</i> strains . . . . .                         | 29 |
| <b>Figure S12</b>            | Multiple protein sequence alignment of NrdJ ribonucleoside-diphosphate reductases from selected <i>Nostoc</i> and <i>Anabaena</i> strains with <i>in silico</i> excised intervening sequences . . . . .          | 30 |
| <b>Figure S13</b>            | Simplified scheme of murein biosynthesis . . . . .                                                                                                                                                               | 32 |
| <b>Figure S14</b>            | Neighbor-joining phylogenetic tree based on the protein sequences of selected D-Ala-D-Ala ATP grasp ligases . . . . .                                                                                            | 33 |
| <b>Figure S15</b>            | D-Ala-D-Ala ligase 3 gene clusters of lichen-associated <i>Nostoc</i> strains .                                                                                                                                  | 34 |
| <b>Figure S16</b>            | Phosphorylation of chloramphenicol by chloramphenicol phosphotransferase (CPT). . . . .                                                                                                                          | 35 |
| <b>Figure S17</b>            | Protein sequence alignment of chloramphenicol phosphotransferases . .                                                                                                                                            | 35 |
| <b>Figure S18</b>            | Gene clusters encoding glycolipid synthases, polyketide synthases and non-ribosomal peptide synthases in the <i>Nostoc</i> sp. N6 and <i>Nostoc</i> sp. ' <i>Lobaria pulmonaria</i> cyanobiont' genome . . . . . | 36 |
| <b>Figure S19</b>            | Nosperin gene cluster in <i>Nostoc</i> sp. N6 and its remnants in the <i>L. pulmonaria</i> cyanobiont . . . . .                                                                                                  | 49 |
| <b>Figure S20</b>            | Structures and putative biosynthetic gene clusters of cyanobacterin and nostocliides . . . . .                                                                                                                   | 50 |
| <b>Figure S21</b>            | Workflow for extracting orthologous groups specific to different clades .                                                                                                                                        | 51 |
| <b>Table S1</b>              | Assemblies of <i>Nostoc</i> genomes . . . . .                                                                                                                                                                    | 52 |
| <b>Table S2</b>              | Completeness and contamination of <i>Nostoc</i> genome assemblies assessed with CheckM . . . . .                                                                                                                 | 53 |

|                   |                                                                                                                                                                                                                   |    |
|-------------------|-------------------------------------------------------------------------------------------------------------------------------------------------------------------------------------------------------------------|----|
| <b>Table S3</b>   | COG category assignment of the proteins encoded in the genome of <i>Nostoc</i> sp. N6 . . . . .                                                                                                                   | 54 |
| <b>Table S4</b>   | COG category assignment of the proteins encoded in the genome of <i>Nostoc</i> sp. ' <i>Lobaria pulmonaria</i> cyanobiont' . . . . .                                                                              | 55 |
| <b>Table S5</b>   | COG category assignment of the proteins encoded in the genomes of <i>Nostoc</i> and <i>Anabaena</i> strains . . . . .                                                                                             | 56 |
| <b>Table S6</b>   | Scytonemin biosynthesis genes of <i>Nostoc punctiforme</i> and their presence in lichen-associated <i>Nostoc</i> strains . . . . .                                                                                | 57 |
| <b>Table S7</b>   | Number of transposase genes in the <i>Nostoc</i> sp. N6 and <i>Nostoc</i> sp. ' <i>Lobaria pulmonaria</i> cyanobiont' genomes . . . . .                                                                           | 58 |
| <b>Table S8</b>   | IS family composition of the <i>Nostoc</i> sp. N6 and <i>Nostoc</i> sp. ' <i>Lobaria pulmonaria</i> cyanobiont' genomes . . . . .                                                                                 | 59 |
| <b>Table S9</b>   | Intein-containing proteins encoded in the genome of <i>Nostoc</i> sp. N6 . . . . .                                                                                                                                | 60 |
| <b>Table S10</b>  | Distribution of thymidilate synthase genes among Cyanobacteria . . . . .                                                                                                                                          | 61 |
| <b>Table S11</b>  | Intervening sequences in ribonucleoside-diphosphate reductase <i>nrdJ</i> genes from selected <i>Nostoc</i> and <i>Anabaena</i> strains . . . . .                                                                 | 62 |
| <b>Table S12</b>  | Expression of phospholipases C and D by the <i>Peltigera membranacea</i> mycobiont . . . . .                                                                                                                      | 63 |
| <b>Table S13</b>  | Gene clusters encoding glycolipid synthases, polyketide synthases and non-ribosomal peptide synthases in the <i>Nostoc</i> sp. N6 and <i>Nostoc</i> sp. ' <i>Lobaria pulmonaria</i> cyanobiont' genomes . . . . . | 64 |
| <b>Table S14</b>  | Analysis of adenylation domains present in the non-ribosomal peptide synthases encoded in the the <i>Nostoc</i> sp. N6 and <i>Nostoc</i> sp. ' <i>Lobaria pulmonaria</i> cyanobiont' genomes . . . . .            | 65 |
| <b>References</b> | . . . . .                                                                                                                                                                                                         | 67 |

## Supplementary Text S1.

### Genome comparison

**Transposons and inteins.** Large scale genome comparisons of lichen-associated strains with *N. punctiforme* PCC 73102 reveal a low level of synteny between them (Figure S4) indicating high genome plasticity and genome shuffling in these strains (Figure S5). This may be largely due to the activity of mobile elements. The number of genes belonging to the mobilome category (X; transposase and phage genes) is nearly 2.5 fold higher in *Nostoc* sp. N6 than in the cyanobiont of *L. pulmonaria* and one of the highest among *Nostoc* and *Anabaena* strains (Tables S3-S5), suggesting that *Nostoc* sp. N6 has a higher degree of genome plasticity. Genome plasticity has been suggested as an adaptive strategy allowing prokaryotes to diversify in a way similar to sexual reproduction in eukaryotes (Filee et al., 2007; Lin et al., 2011). It has been pointed out that a high frequency of mobile elements located in genomes would facilitate this adaptive strategy (Frangeul et al., 2008). Careful manual annotation of the *Nostoc* sp. N6 genome taking into account translation frameshifting, common in open reading frames (ORFs) encoding transposases (Chandler and Fayet, 1993), allowed identification of 97 intact full-length transposase genes and 90 transposase pseudogenes. In the genome of the *L. pulmonaria* cyanobiont most transposase genes have undergone pseudogenization with only 36 intact genes versus 117 pseudogenes (Table S7). It should be noted that some transposase genes in other Nostocales genomes were found to be incorrectly annotated, e.g. as two adjacent ORFs rather than a single ORF with translation frameshifting (Chandler and Fayet, 1993), resulting in an overestimate for the number of transposase genes.

Insertion sequence (IS) elements, often in association with transposase genes, are particularly abundant in the genomes of mutualistic symbionts and some pathogens that have recently transitioned or are transitioning to an obligate, host-associated lifestyle (Moran and Plague, 2004; Newton and Bordenstein, 2011; Schmitz-Esser et al., 2011; Kleiner et al., 2013). In contrast, they are absent in the reduced genomes of most obligate, host-restricted, clonally propagating bacteria that have been associated with their hosts over long evolutionary time periods. For example, ISs are absent in the majority of the genomes of symbionts classified as obligately intracellular, including chloroplasts (Newton and Bordenstein, 2011; Bordenstein and Reznikoff, 2005).

The IS family composition of the two genomes differed markedly (Table S8). For example, the *ISNCY* family, only found in cyanobacteria (Lin et al., 2011), is represented by 4 copies in the genome of the *L. pulmonaria* cyanobiont and none in the *Nostoc* sp. N6 genome. IS numbers therefore do not reflect the close phylogenetic relationship between these two strains nor their mode of propagation.

*Nostoc* sp. N6 has a high number of transposable elements and inteins (intervening protein sequences that are excised in the process of protein splicing (Gogarten et al., 2002) (Tables S3 and S5). The best studied case of inteins in Cyanobacteria is in DnaE (the  $\alpha$  subunit of DNA polymerase III) encoded by two different ORFs and assembled by trans-splicing (Wu et al., 1998). The genome of *Nostoc* sp. N6 encodes 5 proteins with inteins (locus tags NPM\_0997, NPM\_1656, NPM\_2566, NPM\_2586 and NPM\_5024; Table S9) whereas the genome of the *L. pulmonaria* cyanobiont contains none. While some of the intein-containing proteins have functional protein homologs encoded in the genome of *Nostoc* sp. N6 there is little sequence identity between the homologs, except for DnaB helicase (Table S9). All the intein-containing proteins, except for the ribonucleoside-triphosphate reductase (NPM\_2566) and superfamily II DNA/RNA helicase (NPM\_5024) have homologs with the same proposed function without inteins in the *Nostoc* sp. N6 genome (Table S9).

**An intron in the *tRNA<sup>fMet</sup>* gene.** In addition to the group I intron of the *tRNA<sup>Leu</sup>*(UAA) gene conserved throughout Cyanobacteria (including plastids), another group I self-splicing intron was found in the anticodon loop of the initiator methionine tRNA (*tRNA<sup>fMet</sup>*) gene in *Nostoc* sp. N6. The absence of this intron in the *tRNA<sup>fMet</sup>* gene of the *L. pulmonaria* cyanobiont is consistent with its sporadic distribution in Cyanobacteria (Paquin et al., 1997). An identical *tRNA<sup>fMet</sup>* intron was found in *Nostoc* sp. 213 and the metagenome of *P. membranacea*, but not in any other lichen-associated *Nostoc* strains sequenced in this study nor in *N. punctiforme* (Figure S6).

## Supplementary Text S2.

### Comparison to minimal bacterial and cyanobacterial gene sets

**Pyrimidine metabolism.** The most prominent differences were observed for the proteins involved in pyrimidine metabolism (Kyoto Encyclopedia of Genes and Genomes (KEGG) pathway 00240). For example, *Nostoc* sp. N6 and *Nostoc* sp. '*L. pulmonaria* cyanobiont' differ in the nature of their thymidylate synthases. All cellular organisms need thymidine as thymidine triphosphate (dTTP) is essential for DNA replication. Cells can produce thymidylate either by phosphorylation of thymidine using thymidine kinases (EC:2.7.1.21) or via thymidylate synthase from deoxyuridine monophosphate (dUMP) by methylation of the pyrimidine at position 5. There are two distinct thymidylate synthase enzymes: ThyA (EC:2.1.1.45) and ThyX (EC:2.1.1.148) (Mylykallio et al., 2002; Leduc et al., 2004), both using 5,10-methylene tetrahydrofolate as a methyl donor. There is no sequence homology between the two enzymes, and their mechanisms of action differ in that ThyX has tightly associated FAD as a cofactor mediating electron transfer from NADPH (Leduc et al., 2004) (Figure S7). *Nostoc* sp. N6 was found to encode ThyX, while the genome of *Nostoc* sp. '*L. pulmonaria* cyanobiont' encodes ThyA. ThyX is more common than ThyA in Cyanobacteria (Table S10) and *thyX* genes can be found in many photosynthetic, anaerobic or microaerophilic bacteria, suggesting that the ThyX pathway is preferentially used in species where the NADP/NADPH pool is kept relatively reduced (Leduc et al., 2004). In agreement with this proposal, the *thyX* gene from microaerophilic *Campylobacter jejuni* has been found to complement an *Escherichia coli thyA* mutant only under oxygen-limiting conditions (Giladi et al., 2002).

It is not clear whether the occurrence of *thyA* and *thyX* genes in lichen-associated *Nostoc* strains reflects the differences of thallus morphology of bipartite and tripartite lichens. Since the bulk of the lichen thallus consists of the heterotrophic mycobiont, the thallus interior is microaerobic (Millbank, 1977). In contrast, cyanobacteria in cephalodia of tripartite lichens, such as *L. pulmonaria*, are exposed to a more aerobic environment (Millbank, 1977). It has also been suggested that ThyA proteins are preferred for the replication of large bacterial genomes since they are catalytically more efficient (Escartin et al., 2008). However, genomes of most *Nostoc* strains, despite being relatively large, encode ThyX. In culture the cyanobiont of *L. pulmonaria* exhibited much slower growth than *Nostoc* sp. N6, despite encoding the ThyA thymidylate synthase. It is possible that each thymidylate synthase is advantageous under certain conditions. Occurrence of both thymidylate synthase genes in *Nostoc* sp. 210A, with the *thyX* being a pseudogene (Table S10), is consistent with this idea.

The homolog of dCTP deaminase (Dcd; EC:3.5.4.13) was initially not found in the *Nostoc* sp. '*L. pulmonaria*' genome. This enzyme hydrolyzes deoxycytidine triphosphate (dCTP) yielding deoxyuridine triphosphate (dUTP). dUTP is a natural precursor of dTTP and can be incorporated directly into DNA to create A:U base pairs, as the replicative polymerase does not discriminate between dUTP and dTTP (Figure S8). Independent of dUTP production, dTTP can be synthesized through deoxycytidylate (dCMP) deaminase (Dctd; EC:3.5.4.12). dCMP deaminase is an enzyme that participates in dTTP biosynthesis throughout the cell cycle via conversion of dCMP to dUMP, with capacity to produce adequate quantities of dTTP to sustain DNA replication (McIntosh and Haynes, 1984). dCMP deaminase has been shown to be expressed at a constant level during the cell cycle in the budding yeast *Saccharomyces cerevisiae*, enabling the enzyme to expand the dUMP pool both during and between successive S phases (McIntosh and Haynes, 1984; McIntosh et al., 1986). Although the gene encoding dCMP deaminase was found in the genome of *Nostoc* sp. '*L. pulmonaria* cyanobiont', it does not carry any genes for dCTP diphosphatase (EC:3.6.12) or deoxycytidine kinase

(EC:2.7.1.14) to produce dCMP. A more thorough bioinformatic search uncovered a protein candidate with low homology to conserved dCTP deaminase domains in the *Nostoc* sp. '*L. pulmonaria*' genome (locus tag NLP\_1863; TIGR02274, E-value 1.97e-03; COG0717, E-value 0.73). Interestingly, no dCTP deaminase gene was found in *Nostoc* sp. 210A.

**Split ribonucleotide reductase enzymes.** Apart from the route involving dCTP deaminase, dUTP can be synthesized directly from uridine diphosphate (UDP) by sequential action of ribonucleoside reductase (RNR; EC: 1.17.4.1) and nucleoside diphosphate kinase (Ndk; EC:2.7.4.6) (Figure S8). RNRs are universally essential, as they provide dNTPs needed for DNA replication and repair (Torrents, 2014). RNRs listed in the minimal bacterial set – NrdE and NrdF – belong to the class Ib aerobic RNRs, comprised of two major ( $\alpha$ ) subunits and two minor ( $\beta$ ) subunits. Genomes of many cyanobacteria encode the B12-dependent, oxygen-indifferent (class II) ribonucleotide reductase (NrdJ) as well as the anaerobic (class III) ribonucleotide reductase (NrdD) together with an activating protein (NrdG). Typically NrdJ is encoded by a single *nrdJ* gene (Torrents, 2014). An exceptional NrdJ has been identified in *Pseudomonas aeruginosa*, and this enzyme differs from all so far known class II RNRs, as it is split and encoded by two adjacent ORFs, namely *nrdJa* and *nrdJb*, separated by 16 bp (Crona et al., 2015). The *Nostoc punctiforme* *nrdJ* gene has also been found to be split, namely by insertion of a 383 bp group I intron (Meng et al., 2007). Bioinformatic analysis of *nrdJ* coding regions in several *Nostoc* and *Anabaena* strains indicates that almost all of them are interrupted by different intervening sequences, with some genes incorrectly annotated as pseudo (Table S11). The majority of the analyzed *nrdJ* genes encode one or two inteins. The *nrdJ* gene in *Anabaena* sp. 90 is interrupted by both an intein sequence and a group II intron (based on the presence of the conserved sequences at the 5' and 3' splice sites ...↓GUGYG...AY↓...) with an encoded reverse transcriptase/maturase (ANA\_C12699–ANA\_C12701). In other strains, including four symbiotic ones, the *nrdJ* gene is interrupted by non-repetitive insertion sequences. For example, the *nrdJ* gene in *Nostoc* sp. '*L. pulmonaria* cyanobiont' was initially annotated as a pseudogene (NLP\_3546) due to interruption by an insertion sequence. The homologous gene in *N. punctiforme* is also annotated as a pseudogene (Npun\_F2495) with a nearly identical (96% identity within aligned regions) intervening sequence. Conservation of both these sequences and their site of insertion (Figures S11 and S12) is suggestive of introns. The absence of the conserved sequences at the putative splice sites, typical of bacterial group II introns (see above), suggests that these introns belong to group I. Moreover, a guanosine nucleotide (so called  $\omega$ G), highly conserved for group I introns (Hausner et al., 2014), is located at the 3' end of all the intron sequences (Figure S11). Splicing of group I introns is processed by two sequential ester-transfer reactions.[3] The exogenous guanosine or guanosine nucleotide (exoG) first docks onto the active G-binding site located in P7, and its 3'-OH is aligned to attack the phosphodiester bond at the 5' splice site located in P1, resulting in a free 3'-OH group at the upstream exon and the exoG being attached to the 5' end of the intron. Then the terminal G (omega G) of the intron swaps the exoG and occupies the G-binding site to organize the second ester-transfer reaction: the 3'-OH group of the upstream exon in P1 is aligned to attack the 3' splice site in P10, leading to the ligation of the adjacent upstream and downstream exons and release of the catalytic intron. Besides genomes of Cyanobacteria, phage genomes are known to contain self-splicing group I introns within genes involved in nucleotide metabolism, particularly RNR genes (Dwivedi et al., 2013). In contrast to introns, inteins are relatively rare in phage RNR genes. The role and origin of intervening sequences in *nrdJ* genes are not clear. The presence of an intron or intein is a rare evolutionary event, particularly in prokaryotes, and is unlikely to be due to chance, especially

when multiple introns and inteins are found within the same gene and at the same sites of insertion (Dwivedi et al., 2013). Strict control of RNR activity is required as dNTP pool imbalances increase mutation rates, replication anomalies, and genome instability (Torrents, 2014). Therefore, intervening sequences may provide a way for effective regulation of RNR expression on both transcriptional (group I and II introns) and/or translational (inteins) levels.

**Carbohydrate catabolism.** The gene encoding 6-phosphofructokinase (*pfkA*), a key enzyme in the glycolytic pathway, was found to be a pseudogene in *Nostoc* sp. N6 (NPM\_0944) suggesting that carbohydrates are catabolized via the oxidative pentose phosphate (OPP) pathway, the primary route of carbon catabolism in cyanobacteria (Pearce and Carr, 1969), or the Entner–Doudoroff (ED) pathway (Chen et al., 2016) rather than the classical Embden–Meyerhof–Parnas pathway for glycolysis. A *pfkA* pseudogene was also found in the metagenome of *P. membranacea* and no *pfkA* was found in the genome of *Nostoc* sp. 232 while *Nostoc* sp. 210A and the cyanobionts of *P. malacea* and *L. pulmonaria* carry intact copies of the *pfkA* gene. It should be noted that the genomes of all symbiotic *Nostoc* strains examined, including that of *N. punctiforme*, encode a phosphoenolpyruvate-protein phosphotransferase (FruB; EC:2.7.1.202), an enzyme that has a scattered distribution in Cyanobacteria and is capable of fructose 6-phosphorylation. The fructose-6-phosphate can enter the pentose phosphate cycle directly through the action of transketolase (Tkt; EC:2.2.1.1) or indirectly via glucose-6-phosphate by the action of phosphoglucose isomerase (Pgi; EC:5.3.1.9), glucose-6-phosphate dehydrogenase (Zwf; EC:1.1.1.49) and 6-phosphogluconate dehydrogenase (Gnd; EC:1.1.1.44). A second phosphorylation step of fructose can be carried out by a 1-phosphofructokinase (FruK; EC:2.7.1.56) yielding  $\beta$ -D-fructose 1,6-bisphosphate, bypassing the PfkA step to enter the glycolytic pathway. However, no *fruK* genes were found in the *Nostoc* genomes. Interestingly, the symbiotic *Nostoc* strains contain a short homolog of 6-gluconophosphate dehydrogenase (Gnd) (295 vs. 476 aa) only sporadically found outside clade II. Similarly, an alternative version of glucose-6-phosphate dehydrogenase (Zwf), is found in many members of the Nostocales.

**Potassium transport.** In many Cyanobacteria genes for the core Trk potassium transport system are organized in a two-gene operon encoding membrane (TrkG/NtpJ) and NAD-binding (TrkA) components, respectively. A gene encoding TrkG was not found in the *L. pulmonaria* cyanobiont (ort237, Supplementary Excel Table 3). Although the same genome lacks an ortholog of TrkA (ort281, Supplementary Excel Table 3), it encodes another TrkA protein (NLP\_5048) albeit with little sequence identity between the two proteins. Typically, Cyanobacteria have several systems for potassium uptake (Hagemann, 2011) and the loss of potassium transporters in the *L. pulmonaria* cyanobiont may have little impact.



## Supplementary Text S3.

### Identification of genes specific to symbiotic *Nostoc* strains

***Hormogonium regulating locus.*** Hormogonia are relatively short motile filaments, lacking heterocysts, formed by cyanobacteria from the orders Nostocales and Stigonematales. Cyanobacteria differentiate into hormogonia when exposed to environmental stress, or when placed in new media or incubated under red light. Hormogonium differentiation has been found to be crucial for the development of plant-cyanobacteria symbioses (Meeks, 1998). A hormogonium-inducing factor (HIF) secreted by plant hosts induces symbiotic cyanobacteria to differentiate hormogonia and they then dedifferentiate back into nitrogen-fixing filaments after about 48 hours. Cells in the process of hormogonium formation undergo cell division without DNA replication or an increase in mass, leading to cell death if division continues without resumption of vegetative metabolism (Herdman and Rippka, 1988). The capacity of *Nostoc* strains to form hormogonia has been found to be necessary, but not singularly sufficient, for symbiotic competence (Enderlin and Meeks, 1983; Johansson and Bergman, 1994).

A mutant of *N. punctiforme* PCC 73102, characterized by increased hormogonium-dependent infection of the hornwort *Anthoceros punctatus* was recovered in transposon mutagenesis experiments (Cohen and Meeks, 1997). The transposon insertion was next to two ORFs, *hrmU* and *hrmA* (Figure 6), which showed markedly decreased expression. *hrmA* encodes a protein with similarity to a nickel-dependent lactate racemase (COG3875) and a protein domain of unknown function DUF2088 (*pfam09861*), whereas *hrmU* encodes a protein with homology to D-mannonate oxidoreductase. Expression of *hrmUA* is induced by an aqueous extract of *A. punctatus* but not by HIF. The aqueous extract appears to contain a hormogonium repressing factor (HRF) because it suppresses HIF-induced hormogonia formation in the wild type but not in the *hrmUA* mutant. Whereas HIF is released into the immediate vicinity, HRF is probably released into the symbiotic cavity, suppressing further hormogonium formation and permitting heterocyst differentiation. The *hrmUA* genes are preceded by 6 ORFs on the 5' side – *hrmE*, *unk1*, *unk2*, *hrmK*, *hrmR*, and *hrmI* (Figure 6). *HrmE* shows similarity to an inositol oxygenase, *HrmK* to gluconate kinases, *HrmR* to the LacI/GalR family of transcriptional repressors, and *HrmI* to a uronate isomerase. The ORFs *unk1* and *unk2* encode proteins of unknown function with Snoal-like (*pfam12680*) and DUF1815 (*pfam08844*) domains, respectively.

The gluconate kinase homolog encoded by *hrmK* is widespread among bacteria and well conserved among Cyanobacteria where it is thought to feed gluconate into the Entner-Doudoroff (ED) pathway (and possibly the oxidative pentose phosphate pathway, OPP) (Chen et al., 2016). When amino acid sequences of gluconate kinases from eight symbiotic *Nostoc* strains were aligned with sequences from non-symbiotic Nostocaceae, several amino acids appeared conserved in the first group but not in the second group and other bacteria. Interestingly, when fitted onto available structural models (Kraft et al., 2002), most of these amino acid replacements appear in the adaptable lid or outer part of the binding pocket for gluconate, e.g. a tyrosine for phenylalanine substitution between strongly conserved histidine and methionine residues. This may change substrate binding and catalytic properties, which should be amenable to biochemical analyses.

The *HrmR* protein is a DNA-binding transcriptional regulator that also binds to sugar ligands and represses transcription of its own gene (*hrmR*) and nearby *hrmE* (Campbell et al., 2003). Galacturonate abolishes binding of *HrmR* to DNA in vitro, suggesting that the in vivo inducer may be a sugar molecule similar to, or containing, galacturonate (Campbell et al., 2003). These observations led to proposal of the following model of HRF-dependent

modulation of HrmR transcriptional regulation (Cohen and Meeks, 1997). HRF enters the *Nostoc* cell and it, or a derivative similar to galacturonate, binds to HrmR, decreasing affinity for the *hrmR* and *hrmE* promoter regions. This derepresses transcription of these genes, leading to inhibition of hormogonia formation (Campbell et al., 2003). The *hrmEKRIUA* genes, as well as the gene encoding a DUF1815 domain, were found in all lichen-associated *Nostoc* strains, as well as *Nostoc* sp. KVJ20 isolated from *Blasia pusilla* (Liaimer et al., 2016) and *Nostoc calcicola* (Zhu et al., 2017), but not in clade I *Nostoc*, implicating this locus in establishment of symbiosis. In the *L. pulmonaria* cyanobiont the *hrmIUA* genes are pseudogenes and therefore are not functional. Moreover the *hrm* cluster is disrupted and found at two separate loci. This suggests that regulation of hormogonium formation is not necessary in the cyanobiont of *L. pulmonaria*, as *Nostoc* is not its primary photobiont and the lichen propagates predominantly clonally (Dal Grande et al., 2012). It should be noted that production of hormogonia by the *L. pulmonaria* cyanobiont was not observed in culture, whereas *Nostoc* strains isolated from *P. membranacea* (N6, 210A, 213 and 232) formed hormogonia and exhibited motility on agar plates.

In *N. punctiforme* PCC 73102 the hormogonium regulating locus is linked to genes involved in sugar transport (Figure 7) (Ekman et al., 2013). The locus contains genes implicated in glucose (*glcP*) and fructose (*frtA1A2BC*) uptake, a carbohydrate-selective porin (*oprB*), and a putative inositol-2-dehydrogenase (*mviM*), probably all transcribed as an operon (Campbell et al., 2003). Interestingly, the *mviM* gene, (pseudogene in *N. punctiforme* PCC 73102 and the *L. pulmonaria* cyanobiont) located between *oprB* and *glcP*, encodes a putative sugar oxidoreductase (COG0673) implying oxidation of an imported sugar (e.g. conversion of fructose to mannitol). The same arrangement of *hrm* genes was found in *Nostoc* sp. 210A and the *P. malacea* cyanobiont while in the genomes of *Nostoc* sp. N6 and sp. 232 the sugar uptake genes, together with *hrmE* and *mviM*, are located in another part of the chromosome than the *hrmKRIUA* genes. GlcP permease in *N. punctiforme* was found to be necessary for establishing the *Nostoc-Anthoceros* symbiosis, where the plant provides the cyanobacterium with sugar, supporting its initial growth (Ekman et al., 2013; Picossi et al., 2013). In contrast, in the bipartite cyanolichens the cyanobacterium is the main provider of fixed carbon to the mycobiont, but the fungal spores are thought to mobilize sugars upon germination and resumption of metabolism (Dijksterhuis et al., 2002). It has been hypothesized that the *hrm* locus is involved in HRF-induced synthesis of a metabolite inhibitor of hormogonium differentiation, rather than a carbon catabolic function (Campbell et al., 2003). This metabolite, probably similar to galacturonate (Campbell et al., 2003), binding to the HrmR protein, may act in a positive feedback loop alleviating repression of the *hrm* locus, leading to increased production of the metabolite and at the same time facilitating increased import of sugars such as glucose, fructose and sucrose. Since PfkA (6-phosphofructokinase) appears to be nonessential in symbiotic *Nostoc*, these sugars must be channeled through the OPP pathway or the ED pathway, both producing NADPH reducing equivalents facilitating biosynthesis and decreasing dependence on the non-oxidative pentose phosphate reactions (Calvin cycle). This catabolic shift may simultaneously induce development from hormogonia to vegetative cells and heterocysts. The shift from vegetative cells to heterocysts is accompanied by an increase of the OPP-specific Gnd and an even greater increase in Zwf (Ow et al., 2008), indicating increased carbon flow via the ED pathway. The *hrm* locus appears to be restricted to the *Nostoc* II clade and its sister clade (Figure 4).

***D-alanine-D-alanine ligase operon.*** D-alanine-D-alanine (D-Ala-D-Ala) ligases belong to the group of ATP-grasp enzymes that possess ATP-dependent carboxylate-amine ligase activ-

ity (Iyer et al., 2009). Canonical D-Ala-D-Ala ligases (DdlA and DdlB) participate in peptidoglycan (murein) biosynthesis and catalyze the formation of the D-Ala dipeptide (Figure S13) (Healy et al., 2000). The *N*-terminal region of the D-Ala-D-Ala ligases (*pfam01820*) is thought to be involved in substrate (D-alanine) binding, while the *C*-terminus (*pfam07478*) is thought to be a catalytic domain. Biosynthesis of peptidoglycan requires crosslinking of peptidyl moieties on adjacent glycan strands. The D-Ala-D-Ala transpeptidase, which catalyzes this crosslinking, is the target of  $\beta$ -lactam antibiotics, e.g. penicillin. Glycopeptide antibiotics, such as vancomycin, in contrast, do not inhibit an enzyme, but bind directly to D-alanine-D-alanine moieties and prevent subsequent crosslinking by the transpeptidase. Resistance of certain bacteria to vancomycin has been traced to altered ligases producing D-alanine-D-lactate (VanA and VanB) and D-alanine-D-serine (VanC) instead of D-Ala-D-Ala (Healy et al., 2000).

We identified 3 different D-Ala-D-Ala ligases in the genomes of lichen-associated *Nostoc* strains. One of the enzymes groups with other DdlA proteins on the phylogenetic tree suggesting its involvement in murein D-Ala dipeptide biosynthesis (Figure S14). This is supported by isolation of UDP-*N*-acetylmuramyl-pentapeptide containing D-Ala-D-Ala from *Anabaena cylindrica* (Kodani et al., 1999) and high sensitivity of *A. variabilis* to vancomycin (Matsushashi et al., 1969).

The other two D-Ala-D-Ala ligases did not have any recognizable *N*-terminal region involved in substrate binding but contain the *C*-terminal domain. One of these enzymes, as deduced by homology analysis and gene neighborhood, is involved in the biosynthesis of a cyanobacterial UV sunscreen, shinorine (Balskus and Walsh, 2010; Gao and Garcia-Pichel, 2011) and ligates serine to the mycosporine-glycine intermediate. The third D-Ala-D-Ala ligase with accompanying enzymes was found only in lichen-associated Nostocs and neither in *N. punctiforme* PCC 73102 nor in free-living strains (Figure S15). Sparse occurrence of homologous proteins in only some genera of Nostocales and Oscillatoriales (Figure S14) suggests its acquisition via horizontal gene transfer. Two lysine modifying enzymes – lysine 2,3-aminomutase (LAM) and lysine methyltransferase (SET) are encoded upstream in the same operon, indicating that lysine may be the substrate for this enzyme. However, as ATP-grasp ligases are involved in a vast range of pathways, it is not clear what molecule lysine is transferred to (Iyer et al., 2009). We suggest that the alternative D-Ala-D-Ala ligase catalyzes transfer of a methylated  $\beta$ -lysine moiety (produced by LAM and SET) onto a yet unknown acceptor substrate. Close proximity of the gene encoding a MATE (NorM) family efflux pump in *Nostoc* sp. N6 and 232 suggests that a synthesized compound may be excreted (Figure S15). Of all  $\beta$ -amino acids,  $\beta$ -lysine seems to be one of the most common in bacteria (Spiteller and von Nussbaum, 2005; von Nussbaum and Spiteller, 2006; Kudo et al., 2014), e.g. as a solubilizing side chain of aminoglycoside antibiotics (streptothricin, albothricin, lysinomycin, myomycin B), or within the periphery of cyclopeptides (capreomycins, tuberactinomycins). Other examples include  $\beta$ -lysine-derived dipeptides, e.g. TAN-1057 A and D, and some other antibiotics, e.g. negamycin, bellenamine, sperabillins A and D. However, the location of the gene encoding a soluble lytic murein transglycosylase (MtlE, COG0741) (Scheurwater et al., 2008) next to the efflux pump gene suggests participation of D-Ala-D-Ala ligase 3 in peptidoglycan biogenesis. Bacterial peptidoglycan biosynthesis begins within the cytoplasm with the synthesis of UDP-MurNAc-L-Ala-D-Glu-X-D-Ala-D-Ala, the so-called Park nucleotide (Figure S13) (Park, 1952). In Gram-negative bacteria, X is usually *meso*-diaminopimelate (*m*-DAP) and in Gram-positive bacteria, X is usually L-lysine (Bugg and Walsh, 1992). The structural appearance of the cyanobacterial cell wall is similar to that of Gram-negative bacteria, but the cyanobacterial peptidoglycan layer is thicker (Golecki, 1988). Furthermore the chemical composition of cyanobacterial peptidoglycan is closer to that of Gram-positive bacteria (Ju-

rgens and Weckesser, 1985). A Park nucleotide containing lysine has been obtained from *A. cylindrica* (Kodani et al., 1999) indicating that Nostocales have a peptidoglycan chemical composition similar to Gram-positive bacteria. This data suggests that D-Ala-D-Ala ligase 3, like the D-Ala-D-Ala ligase 1 (DdIA), may be involved in modification of peptide moieties in peptidoglycans. This gene cluster is characteristic of the lichen associated *Nostoc* strains (Figure 4).

**Phosphonate biosynthetic genes.** Phosphonates are organophosphorus compounds containing direct carbon-phosphorus bonds and represent a structurally diverse class of natural products, including several bioactive phosphonates, as well as those needed for the synthesis of certain phosphonolipids and phosphonoglycans. Virtually all known phosphonates are derived from phosphoenolpyruvate (PEP) by isomerization to phosphonopyruvate in a thermodynamically unfavorable reaction catalyzed by the enzyme PEP mutase (PepM). This reaction is followed by a thermodynamically favorable decarboxylation step catalyzed by phosphonopyruvate decarboxylase (Ppd). A wide range of C–P biomolecules are then created by diverse biosynthetic steps. The genes encoding these downstream enzymes are usually clustered with the *pepM* and *ppd* genes, a feature that has greatly facilitated genetic and biochemical studies of phosphonate biosynthesis and allowed prediction of the types of C–P molecules produced by the metabolic pathways encoded by these linked genes (Yu et al., 2013). A phylogenetic study of *pepM* from many bacterial genomes with surrounding upstream and downstream genes showed scant correlation between the PEP mutase phylogeny and organismal phylogenies (Yu et al., 2013).

In contrast, a strong correlation between PEP mutase phylogeny and the *pepM* gene neighborhood was observed, represented by 12 distinct groups of nearly identical gene neighborhoods. All of the PEP mutase sequences from each group were found to be monophyletic, suggesting that similarity of PEP mutase is a good predictor of the other genes in the phosphonate biosynthetic pathway (Yu et al., 2013). Strongly conserved phosphonate biosynthetic gene clusters occur in all lichen-associated *Nostoc* strains used in this study (Figure 7a). These clusters are not typical for Cyanobacteria with the sole example being a split pathway found in *Chlorogloeopsis fritschii*, suggesting their acquisition through horizontal transfer. Homologous gene clusters found mostly in *Burkholderia* share almost the same set of genes as well as their order (Figure 7a). These clusters were proposed to be involved in biosynthesis of phosphonolipids with 1-hydroxy-2-aminoethylphosphonate (HAEP) as the head group (Figure 7b) (Yu et al., 2013). PepM, Ppd, AEP transaminase and 2OG-Fe(II) oxygenase are responsible for the formation of HAEP. Phosphocholine cytidyltransferase most likely acts as a CDP-diglyceride synthetase catalyzing the synthesis of CDP-diacylglycerol from CTP and phosphatide. CTP:phospho-ethanolamine cytidyltransferase uses phospho-ethanolamine and CTP to form the high-energy donor CMP-phosphonate intermediate with release of pyrophosphate. CDP-alcohol phosphatidyltransferase (CDP-APT; *pfam01066*), an essential enzyme in phospholipid biosynthesis, then catalyzes the formation of phosphonolipid with a HAEP head group using CMP-HAEP and a lipid anchor such as diacylglycerol (DAG) or alkyl-acylglycerol (AAG) (Figure 7b).

The bacterial members of the CDP-APT family are known to have different specificities adding different polar head groups on phospholipids. A phylogenomic survey has shown that the different CDP-APTs group in phylogenetic trees according to their predicted substrates (Daiyasu et al., 2005). In addition, the groups of bacterial sequences were in agreement with the main bacterial taxonomic groups. Interestingly, only *Nostoc* sp. 232 has a common cyanobacterial homolog of CDP-APT, while other lichen associated *Nostoc* strains have only

phosphonate-related CDP-APT. HAEP was found to be a head group of sphingophosphonolipids previously characterized in the predatory bacterium *Bacteriovorax stolpii* (Jayasimhulu et al., 2007; Watanabe et al., 2001). Sphingophosphonolipids were not crucial for the viability and predatory behavior of *B. stolpii*, but cell locomotory behavior was altered and fewer and smaller bdelloplasts (interperiplasmic parasitic stage) were produced (Kaneshiro et al., 2008). It is apparent that although not being vital for cell growth, phosphonolipids as constituents of biomembranes may affect cell wall permeability, cell motility and recognition.

Phosphonolipids are known to resist the action of some phospholipases (Metcalf and van der Donk, 2009). In the lichen symbiosis cyanobionts undergo certain structural changes, including less sheath and thinner cell walls (Bergman and Hällbom, 1982; Tschermak-Woess, 1988; Koriem and Ahmadjian, 1986; Boissière, 1987; Bergman et al., 2007), making them potentially more exposed and susceptible in the intrathalline environment. Therefore, phosphonolipids may have a role in protecting lichen cyanobionts from attack by extracellular phospholipases produced and secreted into the intrathalline space by the mycobiont (Ghannoum, 2000). Various intrathalline lichen-associated bacteria have also been shown to have the capacity to produce phosphatases (Sigurbjörnsdóttir et al., 2015) as well as phospholipases (Gagunashvili, personal observations). RNA-Seq mapping revealed expression of genes encoding phospholipases C and D by the *P. membranacea* mycobiont (Table S12). A chemical analysis would be required to verify the presence of phosphonolipids in lichen cyanobionts. A PCR survey with degenerate PCR primers designed from conserved PepM amino acids motifs can also be done to assess the occurrence and distribution of phosphonate gene clusters in cyanolichens. This cluster is characteristic of the *Nostoc* II clade.

***Chloramphenicol phosphotransferase.*** Chloramphenicol is an antibiotic produced by *Streptomyces venezuelae* ATCC 10712 and several other actinomycetes (Vining and Stuttard, 1995). The bacteriostatic activity of chloramphenicol results from its binding to the 50S subunit of the bacterial ribosome blocking peptidyl transferase (Vining and Westlake, 1984). *S. venezuelae* escapes the toxicity of its own lethal secondary metabolite by expressing a chloramphenicol phosphotransferase (CPT) that phosphorylates the primary (C-3) hydroxyl of chloramphenicol (Figure S16) (Mosher et al., 1995). The 3-*O*-phosphoryl-chloramphenicol product is biologically inactive as an antibiotic. Phosphorylation has been observed as a common way to develop resistance to other antibiotics (Cundliffe, 1992). Genes encoding CPT were found in all the lichen-associated *Nostoc* strains (Figure S17), as well as in *Nostoc* sp. KVJ20 and *Nostoc calcicola*. A BLASTP search of the *Nostoc* CPTs against the GenBank database returned only one homolog from other Cyanobacteria, (*Tolypothrix* sp. PCC 7601) followed by hits to proteins from Firmicutes and Proteobacteria, suggesting that CPT genes have very limited distribution in Cyanobacteria and have been acquired via horizontal gene transfer. It is not clear what drives positive selection of CPT genes in lichen-associated *Nostoc* strains. It is possible that they confer resistance to some chloramphenicol-like metabolites produced by the mycobiont or intrathalline bacteria. Many actinomycete strains, including *Streptomyces* spp., have been isolated from lichens and shown to have a broad spectrum of antimicrobial activity (González et al., 2005; da Silva et al., 2011; Saeng-in et al., 2015). It should be noted that the use of vectors conferring resistance to chloramphenicol, e.g. pRL271, commonly used for genetic manipulation of cyanobacteria (Black et al., 1993), may be problematic with lichen-associated *Nostoc* strains due to their innate resistance to chloramphenicol. Genes encoding CPT were almost exclusively found in the *Nostoc* II clade.



## Supplementary Text S4.

### Secondary metabolites

Cyanobacteria produce a multitude of secondary metabolites, many of them toxic (Dittmann et al., 2015; Pearson et al., 2016). In a recent study, Liaimer et al. (Liaimer et al., 2016) found that *Nostoc* symbionts of the liverwort *Blasia pusilla* more frequently produce nodularin and microcystin type compounds antagonistic to other *Nostoc* strains than free living *Nostoc* from the same locality. Most types of secondary compounds were detected in only 1-4 out of the 20 strains examined. The occurrence of the main secondary metabolite pathways in *Nostoc punctiforme*, the *Nostoc* strains from the *Blasia* habitats (Liaimer et al., 2016) and the lichen-derived strains of this study show little overlap.

One of the secondary compounds detected by Liaimer et al. (Liaimer et al., 2016) is the polyketide synthase plus non-ribosomal peptide synthase (PKS-NRPS) product nosperin (Kampa et al., 2013). We previously suggested that nosperin might have cytotoxic properties analogous to cyanobiont microcystins (Kaasalainen et al., 2009, 2012) which can serve as protective compounds in cyanolichens, e.g. against grazers. Interestingly, *Nostoc* sp. 232 was found to be devoid of *nsp* genes, but it contains a putative microcystin gene cluster not found in the *nsp* containing *Nostoc* sp. N6 strain. Similarly, the single *Blasia*-habitat *Nostoc* strain showing nosperin does not exhibit any of the other metabolites under study (Liaimer et al., 2016).

Remnants of the *nsp* gene cluster were found on the chromosome of the *L. pulmonaria* cyanobiont (Figure S19), where almost the entire cluster has been deleted, probably due to the absence of selective pressure. This indicates that *nsp* genes are not essential for this lichen symbiosis although nosperin may confer advantage under some conditions, e.g. in terrestrial lichens as opposed to epiphytic ones. Its role may be less crucial for clonally propagating lichens or in tripartite lichens, such as *L. pulmonaria*, where the main provider of photosynthate is a green alga but not the cyanobiont. Nevertheless the *nsp* genes have been found in the tripartite terrestrial *Peltigera leucophlebia* (Gagunashvili and Miao, unpublished).

Whole genome sequencing of the nosperin producer *Nostoc* sp. N6 revealed that the *nsp* gene cluster is located on the chromosome. The abundance of insertion sequences surrounding the cluster and the apparent mixed gene origin suggests that it has been acquired as a genomic island through horizontal transfer and undergone several intragenomic recombination events (Kampa et al., 2013).

The genome of *Nostoc* sp. N6 was also found to encode pathways for the biosynthesis of nostopeptolide- (Hoffmann et al., 2003) and banyaside/suomilide-like (Liaimer et al., 2016) compounds as well as nostocyclopeptide (Becker et al., 2004) (Table S13). The nostopeptolide-like cluster seems to be inactive in *Nostoc* sp. N6 due to multiple frameshifts and interruption by ISs, despite being intact in the *P. membranacea* metagenome (GenBank accession GU591312) (Kampa et al., 2013). Nostopeptolide in *Nostoc punctiforme* has been found to be a major hormogonium-repressing factor and therefore considered responsible for cellular differentiation of *Nostoc* (Liaimer et al., 2015). An additional role of nostopeptolide as a chemoattractant of *Nostoc* filaments has also been proposed.

Nostocyclopeptides are cyclic heptapeptides with a unique imino linkage in the macrocyclic ring, isolated from the lichen cyanobiont *Nostoc* sp. ATCC 53789 (Golakoti et al., 2001). The molecular basis for nostocyclopeptide biosynthesis in *Nostoc* sp. ATCC 53789 has been described and involves two NRPS genes (*ncpA* and *ncpB*) as well as genes for biosynthesis of the rare nonproteinogenic amino acid 4-methylproline (4-mPro) (Becker et al., 2004). Two homologous NRPS genes (locus tags NPM\_1843 and NPM\_1844) were found in the genome

of *Nostoc* sp. N6. Although the 4-mPro cassette was absent in the nostocyclopeptide cluster in N6, there is a set of genes for 4-mPro biosynthesis in a nostopeptolide-like gene cluster (locus tags NPM\_0715 and NPM\_0717). Interestingly, the order of adenylation domains in NPM\_1844, confirmed by mate-pair read remapping and reassembly, is different from NcpB of *Nostoc* sp. ATCC 53789 (mPro-Ser-Ile-Phe vs. Ile-Ser-mPro-Phe), representing a natural example of NRPS domain shuffling (Table S14). The function of nostocyclopeptides in *Nostoc* sp. ATCC 53789 is unknown (Becker et al., 2004).

A *Nostoc* sp. strain isolated from the bipartite lichen *Peltigera canina*, belonging to the same group as *P. membranacea*, was shown to produce the chlorine-containing nostoclidides I and II (Figure S20a) (Yang et al., 1993). Nostoclidides exhibited moderate cytotoxicity against the mouse neuroblastoma cell lines Neuro-2a CCL and KB CCL 17 (Yang et al., 1993) and their analogs possess phyto-growth- and photosynthesis-inhibiting properties suggesting the potential use of nostoclidides as herbicides (Barbosa et al., 2006). Since *P. canina* thalli are usually not substantially contaminated with microorganisms, it has been suggested that nostoclidides may be allelopathic agents in the lichen symbiosis. Moreover, a compound with a very similar structure, cyanobacterin, produced by the cyanobacterium *Tolypothrix* sp. PCC 9009 (*Scytonema hofmanni* UTEX 2349) (Mason et al., 1982; Pignatello et al., 1983), was found to inhibit the growth of many cyanobacteria, as well as green algae and angiosperms (Gleason and Baxa, 1986; Gleason and Case, 1986) by specifically disrupting the electron transport chain in photosystem II (Gleason and Paulson, 1984; Gleason, 1990). Nothing is known about the molecular basis of nostoclide and cyanobacterin biosynthesis but they are most likely synthesized via the shikimate pathway (Kacan, 2007). Based on the homology with *Tolypothrix* sp. PCC 9009, we identified putative gene clusters for biosynthesis of nostoclide-like compounds in the genomes of *Nostoc* spp. 210A and 232 (Figure S20b).

## Supplementary Text S5.

### Summary discussion

Draft genome sequences of four more lichen-associated *Nostoc* were included in the analysis to increase the ability to identify possible symbiosis associated genes and gene networks. This set of lichen-associated *Nostoc* genomes was compared to those of symbiotically competent *N. punctiforme* and free-living Nostocs, as well as *Anabaena* strains with complete genomes (Table 1 and Additional file 6). The genome sizes of the symbiotic *Nostoc* strains range from 7.34 Mb to 8.9 Mb and are larger than those of the free-living *Nostoc* and *Anabaena* strains, which range from 5.31 Mb to 7.21 Mb. This size difference may reflect the presence of additional genes necessary for symbiotic competence. The genome of the *L. pulmonaria* cyanobiont exhibits a clear reduction of genome size, also a feature of *Trichormus azollae* ('*Nostoc azollae*' 0708), the cyanobacterial symbiont of the water fern *Azolla filicoides* (Ran et al., 2010). In contrast to *T. azollae*, which is not capable of propagation outside symbiosis (Tang et al., 1990), the cyanobiont of *L. pulmonaria* was able to grow in culture, albeit at a slow rate (this study). Interestingly, *Nostoc* strains isolated from the tripartite lichen *Peltigera aphthosa* also exhibited slow growth in pure culture (Paulsrud et al., 2001). Since slower growth is a common attribute of cyanobionts from tripartite lichens, it is possible this trait confers an advantage for the mycobiont, avoiding overgrowth of cyanobionts since they are "farmed" in cephalodia and their main role is to carry out nitrogen fixation. Nevertheless, it has been shown that the same *Nostoc* strain was present in both bipartite and tripartite lobes of the *P. aphthosa* photosymbiodeme, containing either cyanobacteria or green algae as primary photobionts in different parts of the same thallus (Paulsrud et al., 1998). It is therefore possible that a single *Nostoc* strain forms the physiologically different symbioses that are found in bipartite and tripartite lichens.

Comparative genome analysis of symbiotic and free-living cyanobacteria allowed the identification of several pathways that may contribute to symbiotic competence of *Nostoc* strains. One pathway, encoded by the hormogonium regulating (*hrm*) locus, was previously identified in symbiotically competent *N. punctiforme* and plays a central role in the repression of hormogonia formation. This pathway is similar to pathways of sugar uronate metabolism in heterotrophic non-cyanobacterial prokaryotes (Campbell et al., 2003; Cohen and Meeks, 1997). Although the *hrm* locus has been shown to be important in the *Nostoc*-plant symbiosis, its presence in all of the lichen-associated *Nostoc* strains from this study suggests it is also relevant to establishing *Nostoc*-mycobiont symbioses. Repression of *N. punctiforme* hormogonia is linked to the host release of an unidentified hormogonia-repressing factor and induction of the *hrmA* gene (Meeks, 2003). *hrmA* expression is induced by an aqueous extract of the hornwort *Anthoceros* tissue, leading to the suggestion that a factor in the extract prevents hormogonium formation (Cohen and Meeks, 1997). The flavonoids naringin and, to a lesser degree, neohesperidine and prunine have been found to induce expression of *hrmA* (Cohen and Yamasaki, 2000). *hrmA* expression was also induced by aqueous extracts of *Azolla* spp., and this induction was correlated with the amount of other flavonoids, deoxyanthocyanins (Cohen et al., 2002). In plants, the flavonoid backbone is synthesized by chalcone synthases belonging to type III polyketide synthases (Dao et al., 2011; Seigler, 2012). Chalcone synthase genes have been found in the genomes of ascomycete fungi (Seshime et al., 2005; Hashimoto et al., 2014), including *P. membranacea* and *P. malacea* mycobionts (Gagunashvili, personal observation). Therefore, production of flavonoid compounds with a similar hormogonium repressing activity can be expected in lichen mycobionts.

The *hrm* pathway seems to be inactive in the cyanobiont of *L. pulmonaria* due to pseu-



dogenezation and disruption, and the strain did not show hormogonium production in culture (this study). Therefore, the ability to regulate the formation of hormogonia is likely to be less crucial for *Nostoc* strains from tripartite lichens with cephalodia and/or strains from lichens that reproduce predominantly clonally. It is worth noting that two *Nostoc* isolates from the tripartite *Peltigera apthosa* did not develop hormogonia under any conditions tested (Paulsrud et al., 2001).

Sugars have been suggested to have a role as chemoattractants for cyanobacteria during establishment of the plant symbiosis (Rasmussen et al., 1996; Nilsson et al., 2006; Khamar et al., 2010). It has also been suggested that various sugars, including glucose and fructose, repress the formation of hormogonia after the symbiosis has been established (Khamar et al., 2010). Conservation and colocalization of the *hrm* and sugar uptake genes in the *Nostoc* cyanobionts suggests related roles in signaling and regulatory mechanisms important in establishing and maintaining the lichen symbiosis.

Trehalose is a non-reducing disaccharide composed of two  $\alpha$ -glucose units. It is a carbohydrate storage compound and an important stress protectant involved in metabolic signaling and regulation of carbohydrate metabolism in fungi (Hounsa et al., 1998; Argüelles, 2000; Dijksterhuis et al., 2002; Doehlemann et al., 2006; Svanström and Melin, 2013). Trehalose often accumulates in resting cells of fungi, e.g. ascospores. The first major step of the transition from dormant ascospores to metabolizing, growing fungal cells is the trehalase-catalyzed breakdown of trehalose to glucose monomers. During early germination in the ascomycete *Talaromyces macrosporus*, the intracellular concentration of glucose peaked briefly and a large amount of glucose (10% of the cell weight or more) was released from the cell into the microenvironment (Dijksterhuis et al., 2002). Similar series of processes may be expected for lichen symbionts. Glucose released upon germination of lichen ascospores can serve as both an attractant and a carbon source for *Nostoc* hormogonia, since hormogonia formation is accompanied by a decrease in photosynthetic CO<sub>2</sub> fixation and a shift to heterotrophy. Consistent with this idea, trehalase genes were found in the genomes of *P. membranacea* and *P. malacea* mycobionts (Gagunashvili, personal observation).

Pathways that may be involved in cell wall biogenesis of lichen cyanobionts were also identified. These pathways may lead to cell wall modifications that are better “tailored” to the intrathalline environment, as well as being recognized as compatible by a mycobiont during establishment of symbiosis. Despite being sheltered by a mycobiont, lichen cyanobionts are subjected to extracellular enzymes and metabolites produced by both the mycobiont and intrathalline bacteria. Therefore, an ability to withstand some unfavorable aspects of this cohabitation is expected from lichen-associated *Nostoc* strains. Differences in cell wall composition may explain why *N. punctiforme*, originally isolated from a plant symbiosis, as well as the free-living *Nostoc* sp. PCC 7120, were both unable to enter into symbiosis with the *P. apthosa* mycobiont in thallus incorporation experiments (Paulsrud et al., 2001).

Symbiotically associated *Nostoc* cells show several morphological differences relative to cells in a free-living state (Meeks, 2005). The vegetative cells of symbiotic *Nostoc* spp. are usually larger with a more irregular shape, relatively weak connections between individual cells, and with an aseriate appearance. Moreover, the size difference between vegetative cells and heterocysts is minimal in the symbiotic setting. Physically isolated symbiotic *Nostoc* spp. tend to appear microscopically as unicellular, bicellular or very short filaments. Since the peptidoglycan layer defines the shape of bacterial cells, the peptidoglycan of symbiotic *Nostoc* cells appears to have some structural modifications. Consistent with this idea, we found several genes that are presumably involved in peptidoglycan modification, such as a D-Ala-D-Ala ligase, to be specific for symbiotic *Nostoc* strains.

Lectins produced by mycobionts have long been proposed to be involved in recognition and binding of compatible cyanobacterial and algal partners (Singh and Walia, 2014). Several lectins from a number of both bipartite and tripartite *Peltigera* species have been characterized (Lockhart et al., 1978; Petit, 1982; Petit et al., 1983; Lehr et al., 1995, 2000; Díaz et al., 2009; Feoktistov et al., 2009). These lectins discriminate between preferred and other symbionts. They have been found to bind to the cell wall of lichen-derived, cultured *Nostoc*, as well as to other cultured *Nostoc* strains isolated from different *Peltigera* species, whereas no binding was observed with free-living *Nostoc* cells nor with a *Scytonema* cyanobiont or a green algal phycobiont (Petit, 1982; Petit et al., 1983). These lectins neither bound to the *Nostoc* symbiont of *Anthoceros* nor to a number of free-living cyanobacteria from other genera (Petit, 1982; Petit et al., 1983). Since lectins can be highly specific, it has repeatedly been suggested that they may be key factors in the recognition and selection of compatible symbionts and may induce formation of symbiotic structures by the mycobiont. Selective properties of lectins are associated with reversible binding to carbohydrates exposed on cellular surfaces of photobionts. Some carbohydrate-modifying enzymes in a cyanobiont may therefore be responsible for production of symbiotically specific carbohydrates recognized by a mycobiont. For example, genomes of all symbiotic *Nostoc* strains in this study encode a polysaccharide deacetylase (locus tags NPM\_0822 and NLP\_5237). The family of polysaccharide deacetylases includes NodB, the nodulation protein B from rhizobia, which acts as a chitooligosaccharide deacetylase and is involved in establishing the *Rhizobium*-legume symbiosis (Freiberg et al., 1997).

*pNPM8 Left* 1 AAATTAACAGACGTAAACAGGTTAGATAAGCTTCATGTCTGCAATGAG 47  
*pNPM8 Right* 1 AAATTAACAGACGTAAACAGGTTAGATAAGCTTCATGTCTGCAATGAG 47  
*pNPM10 Left* 1 AAATTAACGGACACACCTG-----TTATATTTGCGTTAAC 35  
*pNPM10 Right* 1 AAATTAACGGACACACCTG-----TTATATTTGCGTTAAC 35  
*pNPM9 Left* 1 AAATTAACGGACACACCTA-----TTATGTCTGCGTTAAC 35  
*pNPM9 Right* 1 AAATTAACGGACACACCTG-----TTATGTCTGCAATTAAC 35

*pNPM8 Left* 48 CTTTTAGATAACAGGTTTATGTATGCGTTAACCAAGTTAATCAGAACC 94  
*pNPM8 Right* 48 CTTTTAGATAACAGGTTTATGTATGCGTTAACCAAGTTAATCAGAACC 94  
*pNPM10 Left* 36 CTGTTAAGCATCTGG-TTATGTCTGCGTTAACTGGTTA----- 72  
*pNPM10 Right* 36 CTGTTAAGCATCTGG-TTATGTCTGCGTTAACTGGTTA----- 72  
*pNPM9 Left* 36 CTGTTAAGCATCTGG-TTATGTCTGCGTTAACTGGTTA----- 72  
*pNPM9 Right* 36 CTGTTAAGCATCTGG-TTATGTCTGCGTTAACTGGTTA----- 72

*pNPM8 Left* 95 TGTTTCATAGCGTATATATCCACAATCATTGTATAATAAGCGTTTCAG 141  
*pNPM8 Right* 95 TGTTTCATAGCGTATATATCCACAATCATTGTATAATAAGCGTTTCAG 141  
*pNPM10 Left* 73 -----GTATCTCTGCGTTAACAAGTTATC----- 96  
*pNPM10 Right* 73 -----GTATCTCTGCGTTAACAAGTTATC----- 96  
*pNPM9 Left* 73 -----GCATCTCTGCGTTAACAAGTTATCATGTTTGCAT-AA 108  
*pNPM9 Right* 73 -----GCATCTCTGCATTAACAAGTTATC---TCTGCATTAA 106

*pNPM8 Left* 142 CTAATGGTTAGATTTGTAGATGAGTTTATAACAGTATATATGCATTA 188  
*pNPM8 Right* 142 CTAATGGTTAGATTTGTAGATGAGTTTATAACAGTATATATGCATTA 188  
*pNPM10 Left* 97 -----GTATCTCTGCGTTAACAAGTTATC-----CCTGCATTA 105  
*pNPM10 Right* 97 -----GTATCTCTGCGTTAACAAGTTATC-----CCTGCATTA 105  
*pNPM9 Left* 109 CGGGTTAACATCTCTGCATAACTGTT-----ATCATGTTTGCA-TA 148  
*pNPM9 Right* 107 CTAGTTAGCATATCTGCATAACTGTT-----ATCATGTTTGCA-TA 146

*pNPM8 Left* 189 TCCTGTTACTACC-TTAGCTAATATGTTATAGATTTA--ATTTTAAA 232  
*pNPM8 Right* 189 TCCTGTTACTACC-TTAGCTAATATGTTATAGATTTA--ATTTTAAA 232  
*pNPM10 Left* 106 ACTGGTTATTGTCGTCATCTAACAGTTTGCCGTCAAAGCATTCTCAA 152  
*pNPM10 Right* 106 ACTGGTTATTGTCGTCATCTAACAGTTTGCCGTCAAAGCATTCTCAA 152  
*pNPM9 Left* 149 ACTGGTTATCATCGTCATCTAACAGTTTGCCGTCAAAGCATTCTCAA 195  
*pNPM9 Right* 147 ACTAGTTAGTATAGTTGCATAACGGGTTATCATGTTTGCA----- 186

*pNPM8 Left* 233 TATTTAACAGGTT--GTAAACATTGGCTGAGAGATTGTAAACA----- 272  
*pNPM8 Right* 233 TATTTAACAGGTT--GTAAACATTGGCTGAGAGATTGTAAACA----- 272  
*pNPM10 Left* 153 ATTTTCCAGGTT-CCCAACCTTTCATAAAATCGTCGTCATC----- 193  
*pNPM10 Right* 153 ATTTTCCAGGTT-CCCAACCTTTCATAAAATCGTCGTCATC----- 193  
*pNPM9 Left* 196 ATTTTCCAGGTTCCCAACCTTTCATAAAATCGTCGTCATC----- 237  
*pNPM9 Right* 187 ----TAACTGGTT-----ATCGTCGTCATCTAACA 212

*pNPM8 Left* 273 -GTTCTATGTAATAACAAGTTATTGATTTTGCCGCGTTCTCGGT--- 315  
*pNPM8 Right* 273 -GTTCTATGTAATAACAAGTTATTGATTTTGCCGCGTTCTCGGT--- 315  
*pNPM10 Left* 194 -TTTTAAGGCGATCGCCG-----TCAAAGCGTTCTCAGACTT 229  
*pNPM10 Right* 194 -TTTTAAGGCGATCGCCG-----TCAAAGCGTTCTCAGACTT 229  
*pNPM9 Left* 238 -TTTAAAGGCGATCGCCGCCAAAGCATCTCAAAGCGTTCTCAA---- 279  
*pNPM9 Right* 213 GTTTGCCAGCGATCGCC-----TCAAAGCGTTCTCAATCTT 249

*pNPM8 Left* 316 -----GTTTTTTGA--CTGGCAACTGTGTTGCCGCGTCTCCACGTC 355  
*pNPM8 Right* 316 -----GTTTTTTGA--CTGGCAACTGTGTTGCCGCGTCTCCACGTC 355  
*pNPM10 Left* 230 TCCCAAGGTTCCCA---TAGTTA-TGCTGTTTTATTTGCTTCTGGCA 272  
*pNPM10 Right* 230 TCCCAAGGTTCCCA---TAGTTA-TGCTGTTTTATTTGCTTCTGGCA 272  
*pNPM9 Left* 280 -----AGTTCCCA-----GGTTA-TGCCTTTTTATTTGCCCTGGCA 316  
*pNPM9 Right* 250 TCC--GTTTTCTTAAAGTTGGTTA-TGCCTTTTTATTTTTCGCTGGCA 293

**Figure S1.** Nucleotide sequence alignment of the ends of the linear replicons from *Nostoc* sp. N6. The alignment was generated using MUSCLE (Edgar, 2004) and visualized in JalView (Waterhouse et al., 2009).

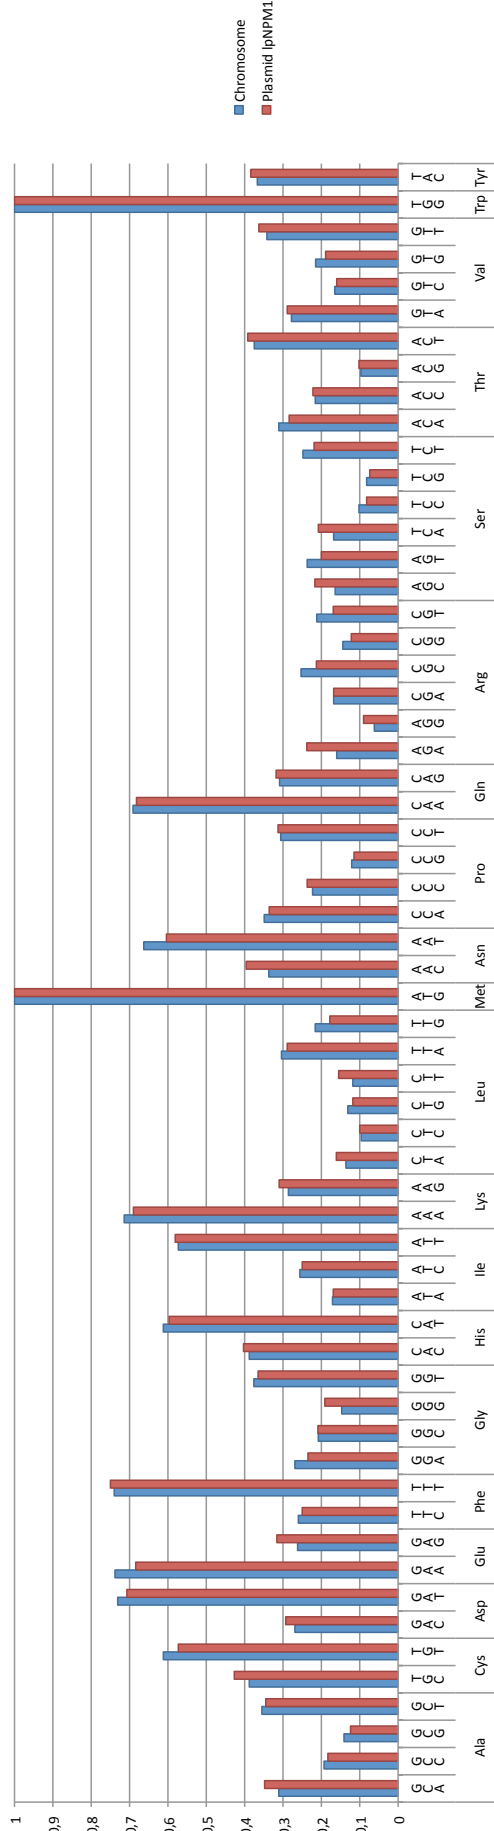

**Figure S2.** Codon usage of genes encoded on the *Nostoc* sp. N6 chromosome and linear replicon pNPM8. The ordinate axis shows the abundance of codon relative to sum of codons for that particular amino acid.

|                                            |                                                                       |  |               |
|--------------------------------------------|-----------------------------------------------------------------------|--|---------------|
|                                            | <i>dnaA</i>                                                           |  | <i>oriC</i> → |
| <i>Nostoc</i> sp. N6                       | AAATCTCACTAGCCGTTCTCAAAAACCATCCTGAAGATGTATTTTCAGTTTCCACAACCTGCCTGCGAT |  |               |
| <i>Nostoc</i> sp. ' <i>L. pulmonaria</i> ' | AAATATGAACAGCCGTTCTCAAAAACCATCCTGAAGATGTCTTTTAAGTTTCCACAACCAGCAGTGCAT |  |               |
|                                            | N L T S R S Q K P S *                                                 |  |               |
|                                            | M                                                                     |  |               |
| <i>Nostoc</i> sp. N6                       | CGCTAGGGTTGACGGCTAAATAATTAGTCGGAAATATTAAGTAACGTCTAAAAATTGATTAATTTAACT |  |               |
| <i>Nostoc</i> sp. ' <i>L. pulmonaria</i> ' | CGTTAGCCTTGACGGCTGAATAATTAGTCAAAAATATTAAGTAACGTATAAAATTTGATTAATCTAACT |  |               |
| <i>Nostoc</i> sp. N6                       | TAAAGTGGGGAAAAAATCTTCCTTTCGTGGATAAATCTGGAAAAAATGATATTTGCTGATAAACT     |  |               |
| <i>Nostoc</i> sp. ' <i>L. pulmonaria</i> ' | TAGATTGTGGAAAAA-TCTAACTTTTGGGGAAAAAATCTCTGAAAAAATGAGATTTGCTGACAAAACT  |  |               |
| <i>Nostoc</i> sp. N6                       | TAATTAAGTATAATTACCTGTGGAAAACTACATAAGTTTTCCACAAGTTTTCCACAAG--GTAAACTT  |  |               |
| <i>Nostoc</i> sp. ' <i>L. pulmonaria</i> ' | TAATTAAGTATAATTACTTGTGGAAAAGTACATAAGTTTTCCACAAGTTTTCCACAAGGTAGTTAACTT |  |               |

**Figure S3.** Origins of replication of the *Nostoc* sp. N6 and *Nostoc* sp. '*Lobaria pulmonaria* cyanobiont' chromosomes. *dnaA* coding regions are highlighted with green, DnaA boxes are highlighted with yellow.

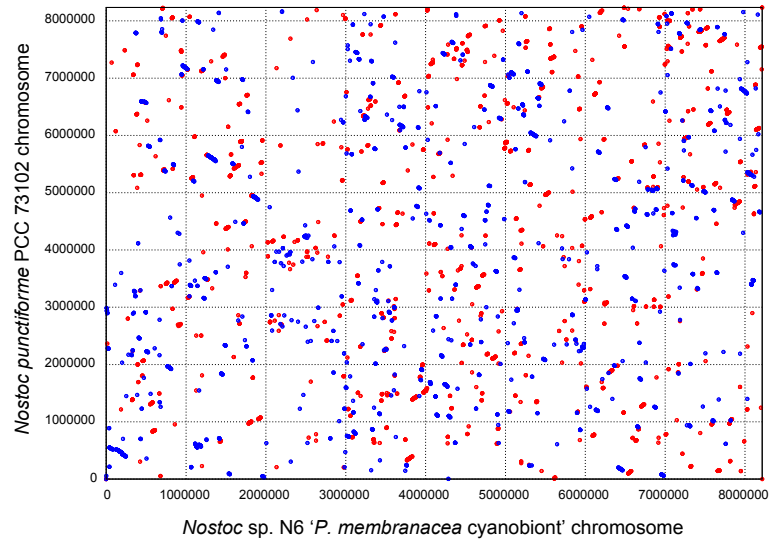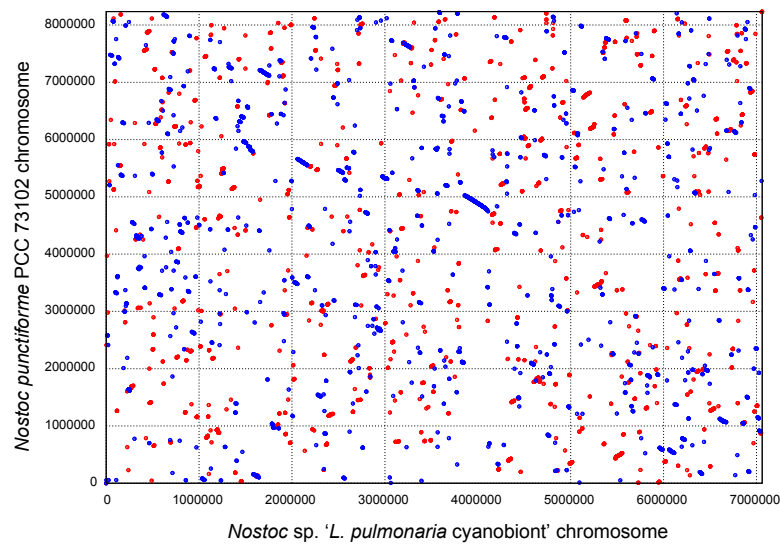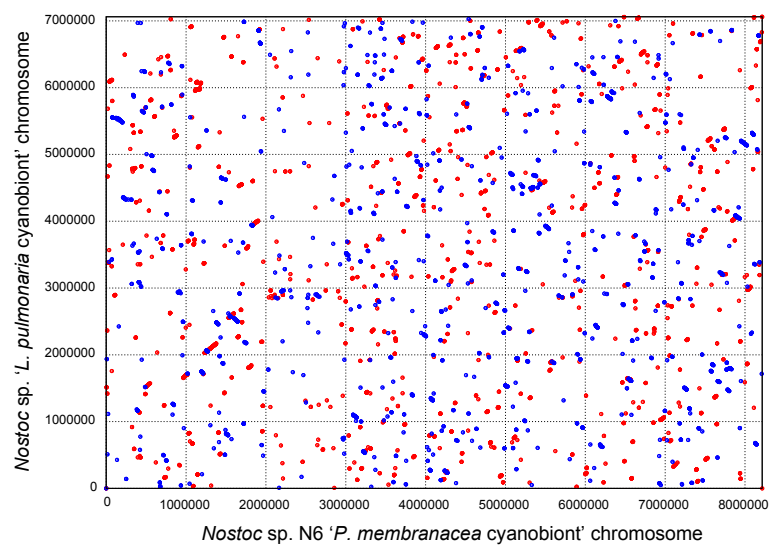

**Figure S4.** Dot plot comparisons of lichen-associated *Nostoc* strains and *N. punctiforme*. Dot plots were generated with PROmer (MUMmer 3.0 package; Kurtz et al., 2004). Only alignments that represent the best homology hit to any particular region on either sequence, i.e. a one-to-one mapping of reference and query subsequences, are displayed. Forward matches are shown in red and reverse matches are shown in blue.

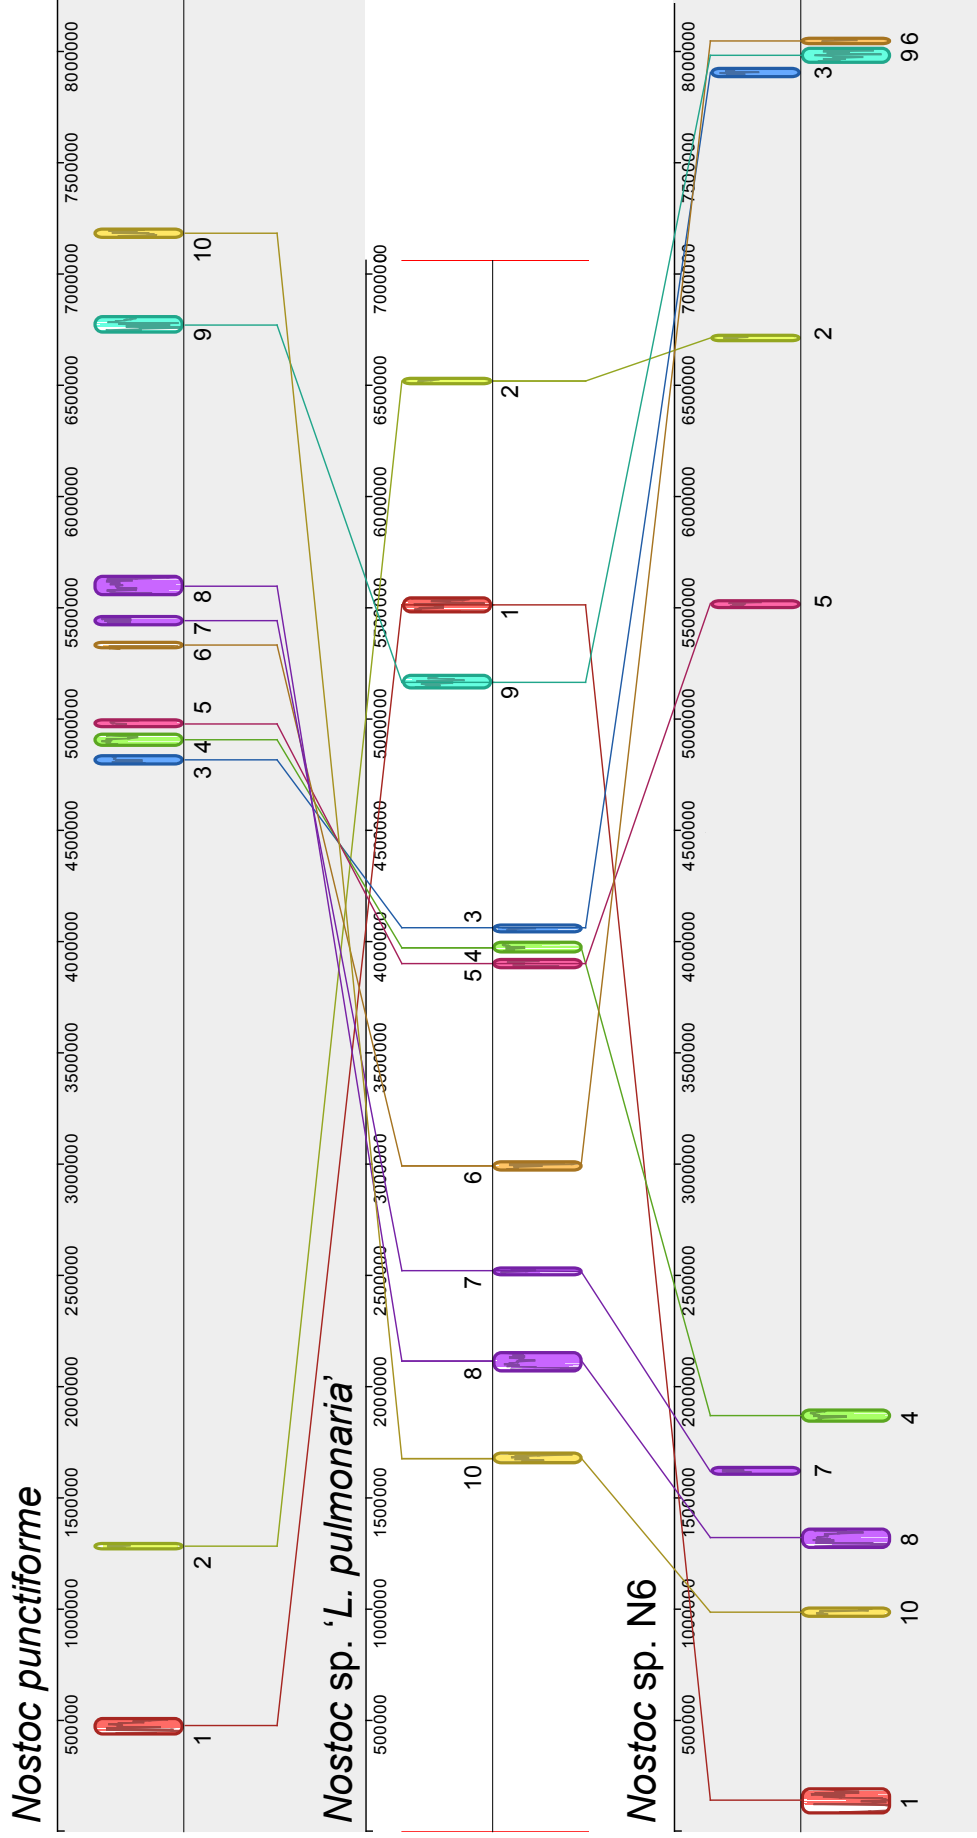

**Figure S5.** Genome sequence alignment of lichen-associated *Nostoc* strains and *N. punctiforme* (as a reference). Alignment was generated using Mauve (Darling et al., 2004). Only 10 most prominent locally collinear blocks (LCBs) are shown. For details on the proteins encoded in the LCBs see Supplementary Excel Table 1.

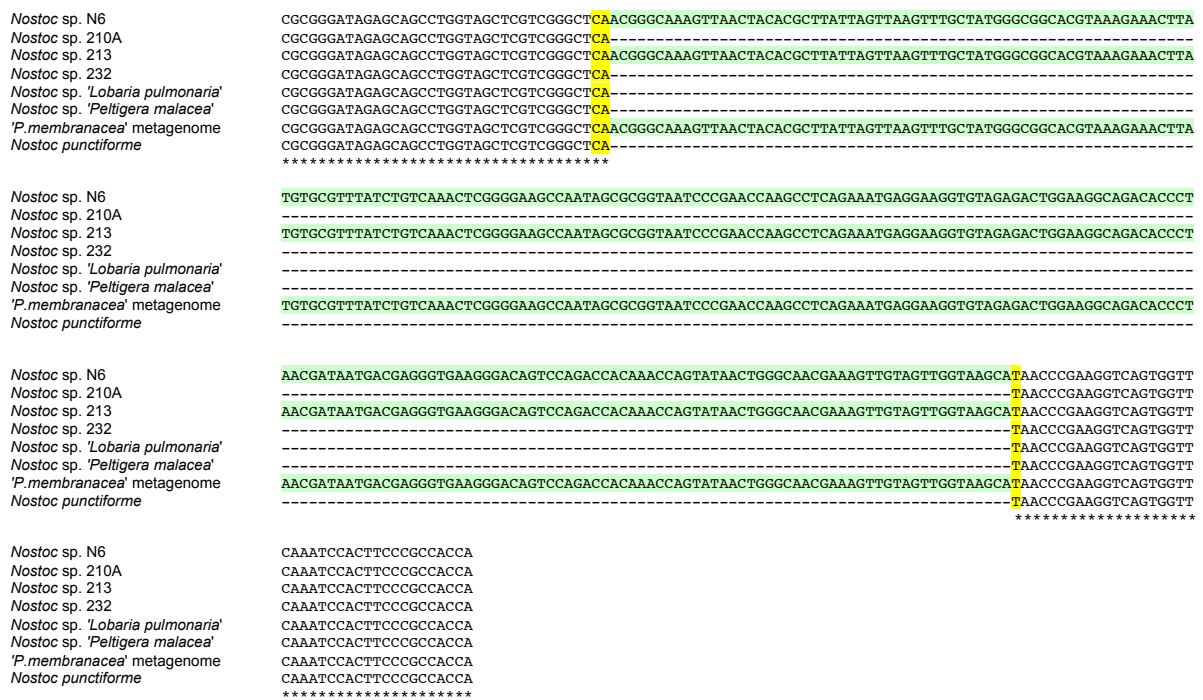

**Figure S6.** Multiple alignment of tRNA<sup>fMet</sup> genes from symbiotic *Nostoc* strains. Group I introns are highlighted with green, anticodons are highlighted with yellow.



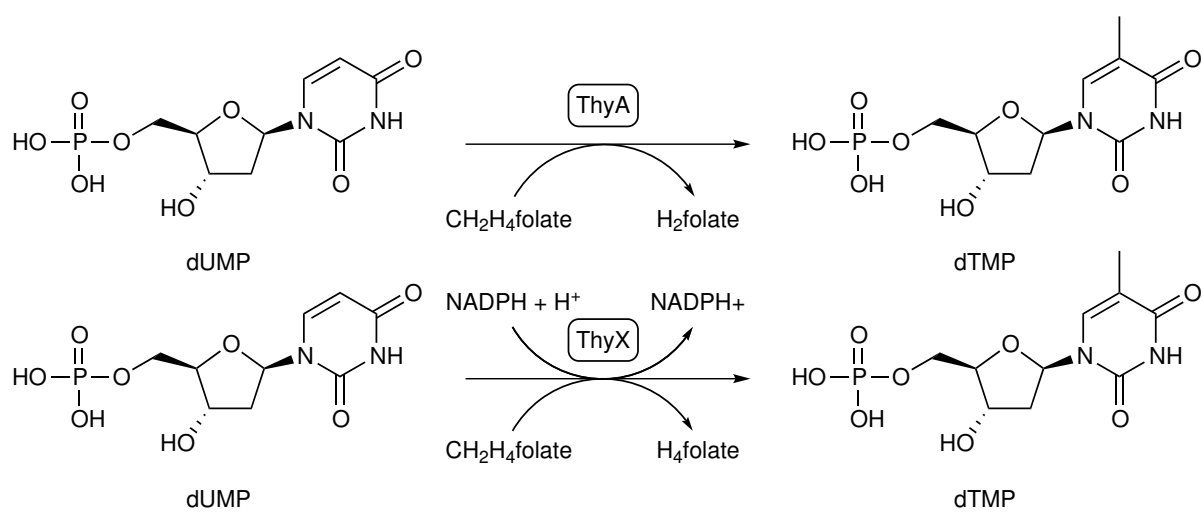

**Figure S7.** Reactions catalyzed by ThyA and ThyX thymidylate synthases. dUMP, deoxyuridine monophosphate; dTMP, thymidine monophosphate;  $\text{CH}_2\text{H}_4\text{folate}$ , 5,10-methylene tetrahydrofolate;  $\text{H}_2\text{folate}$ , dihydrofolate;  $\text{H}_4\text{folate}$ , tetrahydrofolate.

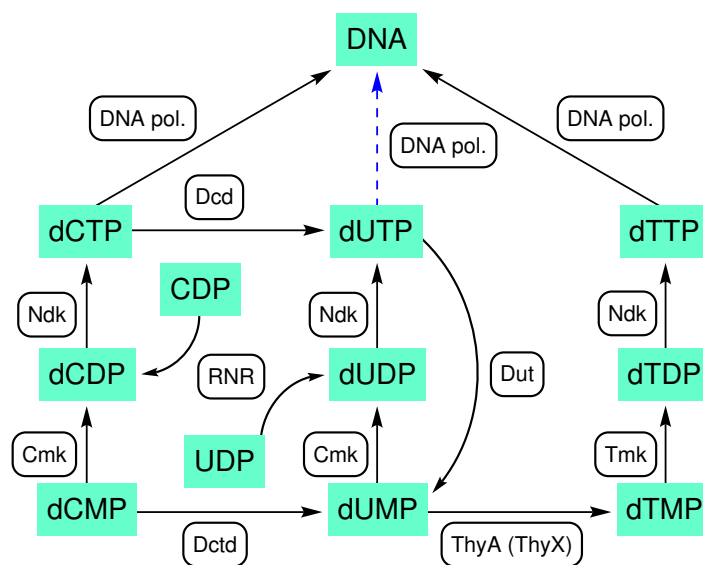

**Figure S8.** Simplified scheme of pyrimidine metabolism (KEGG pathway 00240). DNA pol., DNA polymerase; Dcd, dCTP deaminase; Ndk, nucleoside diphosphate kinase; Cmk, UMP/CMP kinase; Tmk, dTMP kinase; Dctd, dCMP deaminase; Dut, dUTP diphosphatase; ThyA (ThyX), thymidilate synthase; RNR, ribonucleoside-diphosphate reductase.

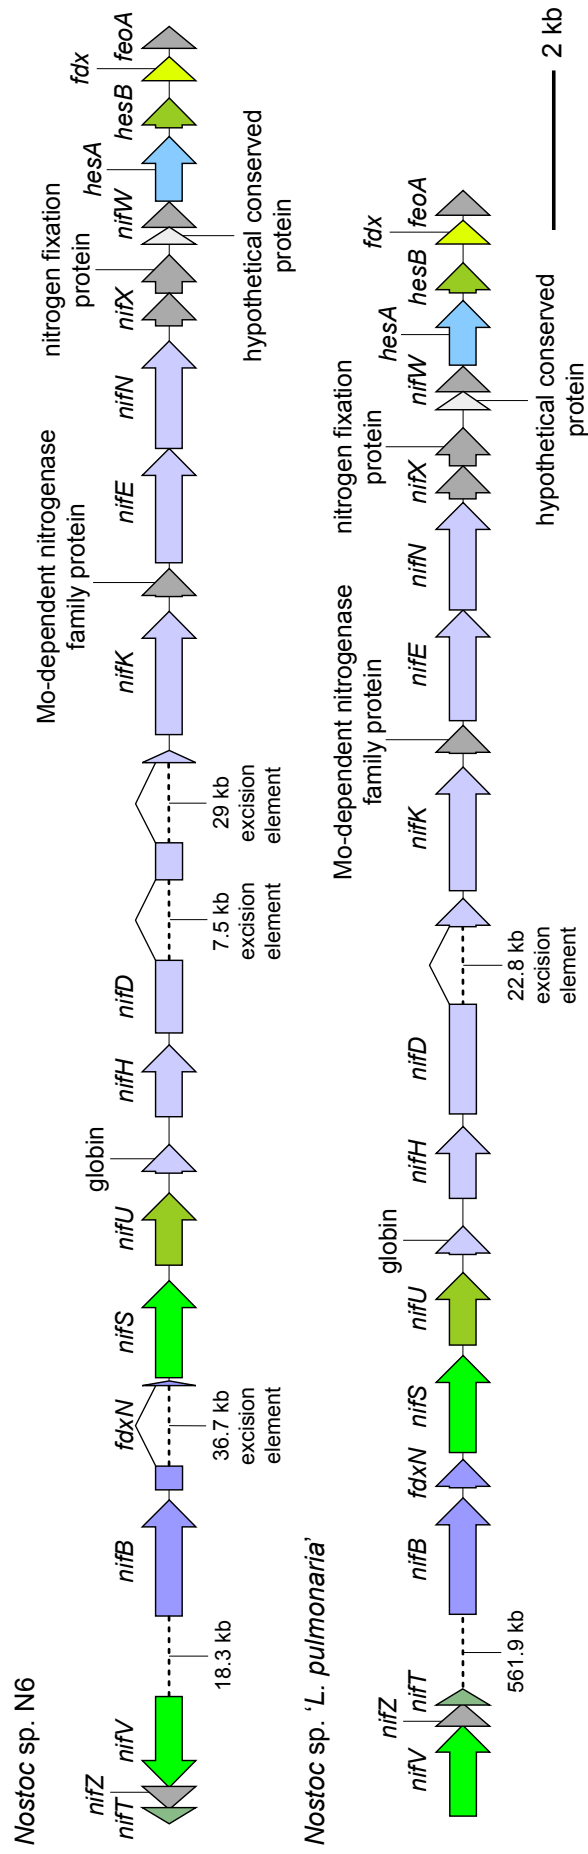

**Figure S9.** Arrangement of *nif* clusters in the *Nostoc* sp. N6 and *Nostoc* sp. 'Lobaria pulmonaria cyanobiont' genomes. Insertion of excision elements in *fdxN* and *nifD* genes are indicated by dashed and connecting lines.

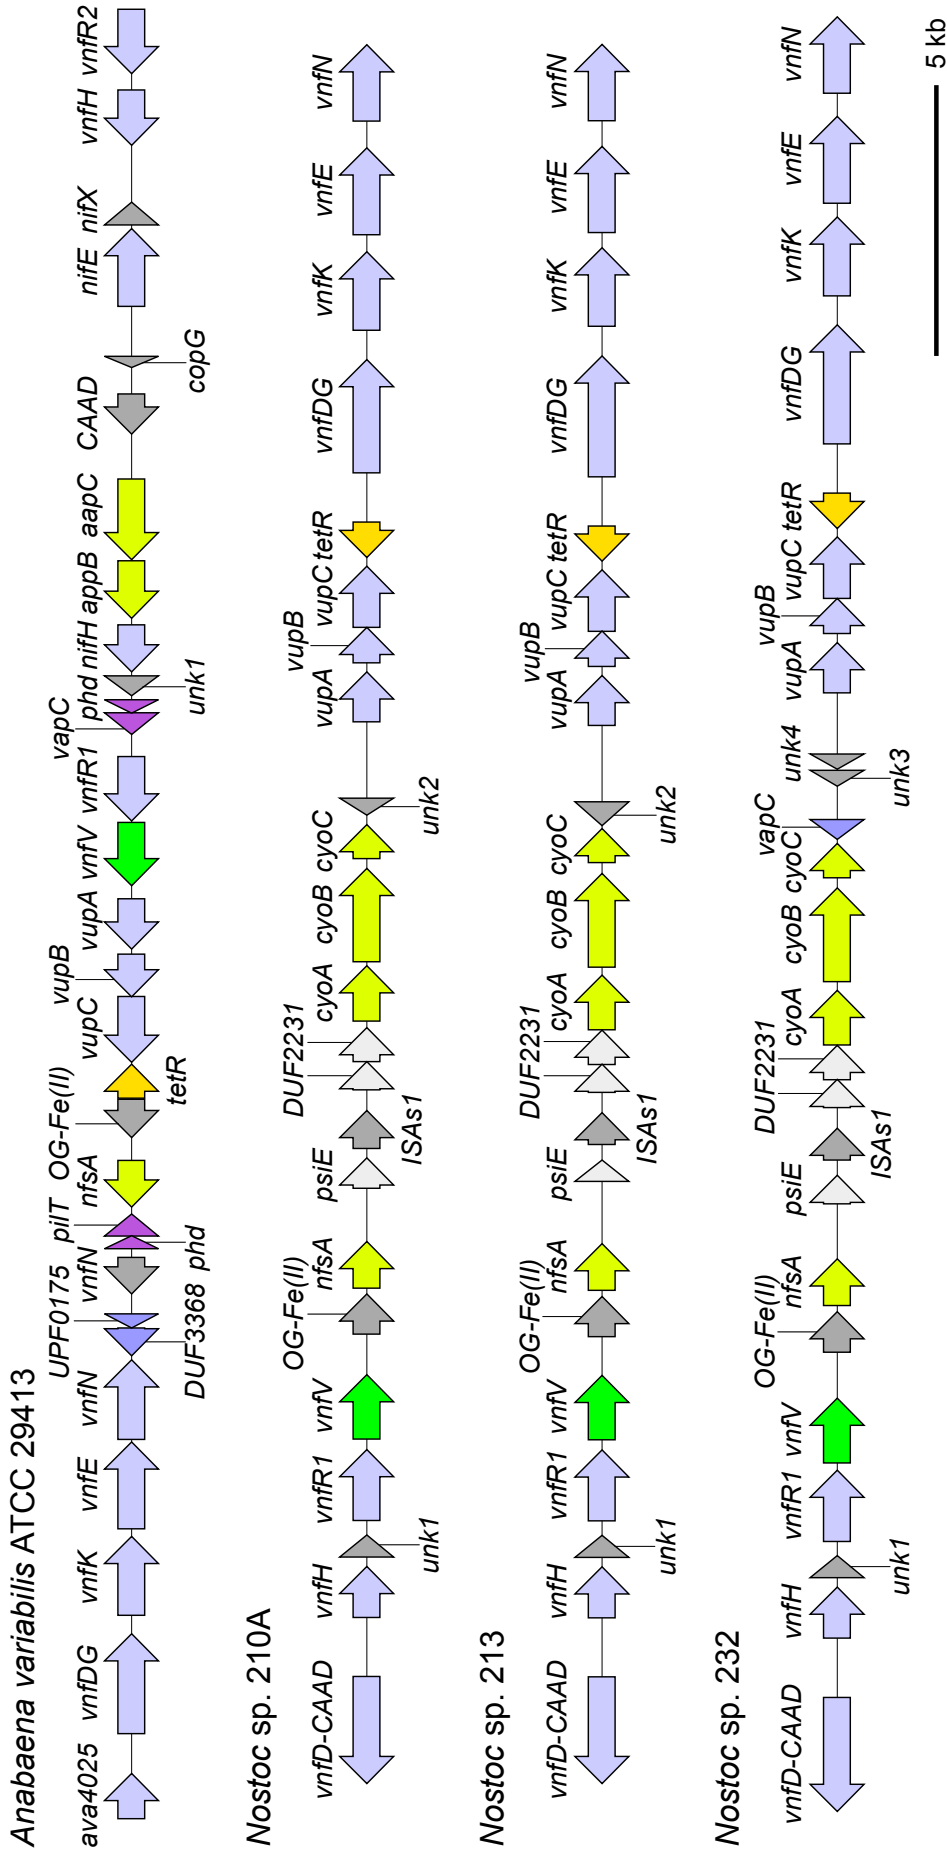

**Figure S10.** Arrangement of *vnf* clusters in *Nostoc* genomes. The *vnf* cluster from *Anabaena variabilis* is shown at the top for comparison. *unk*, conserved hypothetical proteins; UPF, uncharacterized protein family; DUF, domain of unknown function; OG-Fe(II), 2-oxoglutarate non-heme Fe(II) dependent oxidase; CAAD, cyanobacterial aminoacyl-tRNA synthetases appended domain (Ava\_4049); ISAs1, ISAs1 family transposase. Homologous conserved hypothetical proteins are labeled with the same number, e.g. *unk1*.

Nostoc sp. 210A  
 Nostoc sp. 'Lobaria pulmonaria'  
 Nostoc sp. 'Peltigera malacea'  
 Nostoc punctiforme  
 Anabaena sp. 7108  
 Anabaena cylindrica

1 AATTGAT - - - - TTTGCCCTCACGTTAAAAACCTCGCAAAAAACGGGGAAAGCTGAGATGCTAATCCCGTGGTAAATCAAAAGGAATTAATAAGTCTTTGAC 98  
 1 AATTGAT - - - - TTTGCCCTCACGTTAAAAACCTCGCAAAAAACGGGGAAAGCTGAGATGCTAATCCCGTGGTAAATCAAAAGGAATTAATAAGTCTTTGAC 93  
 1 AATTGAT - - - - TTTGCCCTCACGTTAAAAACCTCGCAAAAAACGGGGAAAGCTGAGATGCTAATCCCGTGGTAAATCAAAAGGAATTAATAAGTCTTTGAC 93  
 1 AAGTGAT - - - - TTTGCCCTCACGTTAAAAACCTCGCAAAAAACGGGGAAAGCTGAGATGCTAATCCCGTGGTAAATCAAAAGGAATTAATAAGTCTTTGAC 98  
 1 ACTTTAAATAC TTTGCCCTCACGTTAAAAACCTCGCAAAAAACGGGGAAAGCTGAGATGCTAATCCCGTGGTAAATCAAAAGGAATTAATAAGTCTTTGAC 97  
 1 ATTTAATATAC TTTGCCCTCACGTTAAAAACCTCGCAAAAAACGGGGAAAGCTGAGATGCTAATCCCGTGGTAAATCAAAAGGAATTAATAAGTCTTTGAC 97

Nostoc sp. 210A  
 Nostoc sp. 'Lobaria pulmonaria'  
 Nostoc sp. 'Peltigera malacea'  
 Nostoc punctiforme  
 Anabaena sp. 7108  
 Anabaena cylindrica

94 ACCGTACAGCGTAGAGGTGAAACTAGATTACATTCGGAAATTTGGTGTCTAGAAATAAATCTCTCCAAAGAGTGCAGGGGGCGGATGTGAATAACAACCTTG 190  
 94 ACCGTACAGCGTAGAGGTGAAACTAGATTACATTCGGAAATTTGGTGTCTAGAAATAAATCTCTCCAAAGAGTGCAGGGGGCGGATGTGAATAACAACCTTG 181  
 94 ACCGTACAGCGTAGAGGTGAAACTAGATTACATTCGGAAATTTGGTGTCTAGAAATAAATCTCTCCAAAGAGTGCAGGGGGCGGATGTGAATAACAACCTTG 181  
 94 ACCGTACAGCGTAGAGGTGAAACTAGATTACATTCGGAAATTTGGTGTCTAGAAATAAATCTCTCCAAAGAGTGCAGGGGGCGGATGTGAATAACAACCTTG 190  
 98 ACCGTACAGCGTAGAGGTGAAACTAGATTGCAATGAAATTTGTTCTAGAAATAAALCTCCAAAGAGTGTGGGGTACGTAAT - - - - - 182  
 98 ACCGTACAGCGTAGAGGTGAAACTAGATTGCAATGAAATTTGTTCTAGAAATAAALCTCCAAAGAGTGTGGGGTACGTAAT - - - - - 156

Nostoc sp. 210A  
 Nostoc sp. 'Lobaria pulmonaria'  
 Nostoc sp. 'Peltigera malacea'  
 Nostoc punctiforme  
 Anabaena sp. 7108  
 Anabaena cylindrica

191 TGTTGAGC - - - - - GGAGCCCGAAAAACACTTTTAT 217  
 182 - - - - - AAACACTTTTAT 193  
 182 - - - - - AAACACTTTTAT 193  
 191 TGTTGAGCGGCTTCCCTGAGCGTAGCCGTAAAGCCGTGCGGCATAGCTACGCTTAGGGCCGACGCCTCTCGTAGAGAGGGAGCCCGAAACACTTTTAT 287  
 183 - - - - - TCTCTAT 189

Nostoc sp. 210A  
 Nostoc sp. 'Lobaria pulmonaria'  
 Nostoc sp. 'Peltigera malacea'  
 Nostoc punctiforme  
 Anabaena sp. 7108  
 Anabaena cylindrica

218 TATTTGAGTCAATCTGCAAAATGTACGGGGAGCTACTGCAATAATCAAGCAGTAGAACTAGGGATAAAAAGCCCTTAGGGTAACAAA - TCTG 312  
 194 CATTTGAGTCAATCTGCAAAATGTACGGGGAGCTACTGCAATAATCAAGCAGTAGAACTAGGGATAAAAAGCCCTTAGGGTAACAAA - TCTG 288  
 194 TATTTGAGTCAATCTGCAAAATGTACGGGGAGCTACTGCAATAATCAAGCAGTAGAACTAGGGATAAAAAGCCCTTAGGGTAACAAA - TCTG 288  
 288 TATCTGAGTCAATCTGCAAAAGGTACGGGGAGCTACTGCAATAATCAAGCAGTAGAACTAGGGATAAAAAGCCCTTAGGGTAACAAA - TCTG 383  
 190 CATTTACAGTACTGTTACGTTACAAAAGGTACGGGGAGCTACTGCAATAATCAAGCCTGTAGAACTAGGGATAAAAAGCCCTTAGGGTAACAAA - ACTG 284  
 157 - - - - - CTTACAGGAACTGTAGAAAATGTACTCCGAGGTAAGTGTGAATAA - GAAACACTAGAACTAGAGGATAAAGGCCITTAGGGTAACAAA - ACTG 247

**Figure S11.** Multiple nucleotide sequence alignment of introns intervening the ribonucleoside-diphosphate reductase *nrkJ* genes in selected *Nostoc* and *Anabaena* strains. The alignment was generated using MUSCLE (Edgar, 2004) and visualized in JalView (Waterhouse et al., 2009).

**Nostoc sp. N6** M V R E L E K R Q S A K F P I T A P A A N P V F F R Y S R R T K A G L R E T V D E V C D R T L L G L V E L G K L T Q E E A A T I D K M O R N L K A M P S G R W L W V G G T D M I T K P K N F S G A Y 100  
**Nostoc sp. 210A** M V Q M L E R T R O S A R F P T A P A A N P V F F R Y S R R T K A G L R E T V D E V C D R T L L G L V E L G K L T Q E E A A T I D K M O R N L K A M P S G R W L W V G G T D M I T K P K N F S G A Y 100  
**Nostoc sp. 232** M V R E L E K R Q S A K F P T A P A A N P V F F R Y S R R T K A G L R E T V D E V C D R T L L G L V E L G K L T Q E E A A T I D K M O R N L K A M P S G R W L W V G G T D M I T K P K N F S G A Y 100  
**Nostoc sp. 'Lobaria pulmonaria'** M L O N L E R T R O S A R F P T A P A A N P V F F R Y S R R T K A G L R E T V D E V C D R T L L G L V E L G K L T Q E E A A T I D K M O R N L K A M P S G R W L W V G G T D M I T K P K N F S G A Y 100  
**Nostoc sp. 'Pellicera malacea'** M V O N L E R T R O S A R F P T A P A A N P V F F R Y S R R T K A G L R E T V D E V C D R T L L G L V E L G K L T Q E E A A T I D K M O R N L K A M P S G R W L W V G G T D M I T K P K N F S G A Y 100  
**Nostoc punctiforme** M V R E L E K R Q S A K F P T A P A A N P V F F R Y S R R T K A G L R E T V D E V C D R T L L G L V E L G K L T Q E E A A T I D K M O R N L K A M P S G R W L W V G G T D M I T K P K N F S G A Y 100  
**Nostoc sp. PCC 7107** M V R E L E K R Q S A K F P T A P A A N P V F F R Y S R R T K A G L R E T V D E V C D R T L L G L V E L G K L T Q E E A A T I D K M O R N L K A M P S G R W L W V G G T D M I T K P K N F S G A Y 100  
**Nostoc sp. PCC 7120** M V R E L E R K R G V K F P T A P A A N P V F F R Y S R R T K A G L R E T V D E V C D R T L L G L V E L G K L T Q E E A A T I D K M O R N L K A M P S G R W L W V G G T D M I T K P K N F S G A Y 100  
**Nostoc sp. PCC 7120** M V R E L E K R Q S A R F P T A P A A N P V F F R Y S R R T K A G L R E T V D E V C D R T L L G L V E L G K L T Q E E A A T I D K M O R N L K A M P S G R W L W V G G T D M I T K P K N F S G A Y 100  
**Nostoc sp. PCC 7524** M V R E L E R K Q S A R F P T A P A A N P V F F R Y S R R T K A G L R E T V D E V C D R T L L G L V E L G K L T Q E E A A T I D K M O R N L K A M P S G R W L W V G G T D M I T K P K N F S G A Y 100  
**Anabaena variabilis** M V R E L E R K Q S A R F P T A P A A N P V F F R Y S R R T K A G L R E T V D E V C D R T L L G L V E L G K L T Q E E A A T I D K M O R N L K A M P S G R W L W V G G T D M I T K P K N F S G A Y 100  
**Anabaena sp. PCC 7108** M V R E L E R Q S A K F P T A P A A N P V F F R Y S R R T K A G L R E T V D E V C D R T L L G L V E L G K L T Q E E A A T I D K M O R N L K A M P S G R W L W V G G T D M I T K P K N F S G A Y 100  
**Anabaena sp. 90** M L Q E L D S L F D D V G I R Q R G A F P T A P A A N P V F F R Y S R R T K A G L R E T V D E V C D R T L L G L V E L G K L T Q E E A A T I D K M O R N M K S L P S G R W M V G G T D M L K P K N F S G A Y 109  
**Anabaena cylindrica** M V Q E L E R K Q S A F P T A P A A N P V F F R Y S R R T K A G L R E T V D E V C D R T L L G L V E L G K L T Q E E A A T I D K M O R N M K S L P S G R W M V G G T D M L K P K N F S G A Y 100  
**Trichormus azollae** M V Q E L E R K Q S A F P T A P A A N P V F F R Y S R R T K A G L R E T V D E V C D R T L L G L V E L G K L T Q E E A A T I D K M O R N M K S L P S G R W M V G G T D M L K P K N F S G A Y 100  
  
**Nostoc sp. N6** N C T S T N L E D W S A F G L M M D L A M M G C G T G A V L E P Q F I N Q I P P I R N Q N I T V K S E I G S T P Q O R R E Y T Q I H I E G N V T H V G D S R E G W E S Y Q I L E L S T D I Q F S A E V K V L V 209  
**Nostoc sp. 210A** N C T S T N L E D W S A F G L M M D L A M M G C G T G A V L E P Q F I N Q I P P I R N Q N I T V K S E I G S T P Q O R R E Y T Q I H I E G N V T H V G D S R E G W E S Y Q I L E L S T D I Q F S A E V K V L V 209  
**Nostoc sp. 232** N C T S T N L E D W S A F G L M M D L A M M G C G T G A V L E P Q F I N Q I P P I R N Q N I T V K S E I G S T P Q O R R E Y T Q I H I E G N V T H V G D S R E G W E S Y Q I L E L S T D I Q F S A E V K V L V 209  
**Nostoc sp. 'Lobaria pulmonaria'** N C T S T N L E D W S A F G L M M D L A M M G C G T G A V L E P Q F I N Q I P P I R N Q N I T V K S E I G S T P Q O R R E Y T Q I H I E G N V T H V G D S R E G W E S Y Q I L E L S T D I Q F S A E V K V L V 209  
**Nostoc sp. 'Pellicera malacea'** N C T S T N L E D W S A F G L M M D L A M M G C G T G A V L E P Q F I N Q I P P I R N Q N I T V K S E I G S T P Q O R R E Y T Q I H I E G N V T H V G D S R E G W E S Y Q I L E L S T D I Q F S A E V K V L V 209  
**Nostoc punctiforme** N C T S T N L E D W S A F G L M M D L A M M G C G T G A V L E P Q F I N Q I P P I R N Q N I T V K S E I G S T P Q O R R E Y T Q I H I E G N V T H V G D S R E G W E S Y Q I L E L S T D I Q F S A E V K V L V 209  
**Nostoc sp. PCC 7107** N C T S T N L D W K A F G L M M N L A M M G C G T G A V I E P Y I N Q I P P I R N R H V T V O G E I G S T P K H L R E Y T Q H I E G N S A T Y V G D S R E G W E S Y Q I L E L S T D I Q F S A E V K V L V 209  
**Nostoc sp. PCC 7120** N C T S T N L D W K A F G L M M N L A M M G C G T G A V I E P Y I N Q I P P I R N R H V T V O G E I G S T P K H L R E Y T Q H I E G N S A T Y V G D S R E G W E S Y Q I L E L S T D I Q F S A E V K V L V 209  
**Nostoc sp. PCC 7524** N C T S T N L D W K A F G L M M N L A M M G C G T G A V I E P Y I N Q I P P I R N R H V T V O G E I G S T P K H L R E Y T Q H I E G N S A T Y V G D S R E G W E S Y Q I L E L S T D I Q F S A E V K V L V 209  
**Anabaena variabilis** N C T S T N L D W S A F G L M M D L A M M G C G T G A I I E P Y I N Q I P P I R N L H V T T R G E I G S T P Q O R R E Y T Q I H I E G N V T H V G D S R E G W E S Y Q I L E L S T D I Q F S A E V K V L V 209  
**Anabaena sp. PCC 7108** N C T S T N L D W S A F G L M M D L A M M G C G T G A I I E P Y I N Q I P P I R N L H V T T R G E I G S T P Q O R R E Y T Q I H I E G N V T H V G D S R E G W E S Y Q I L E L S T D I Q F S A E V K V L V 209  
**Anabaena sp. 90** N C T S T N L D W S A F G L M M D L A M M G C G T G A I I E P O Y I N Q I P P I R N L N I T I G E I G S T P K Q R R E Y T Q H I E G N A T H V G D S R E G W K S Y Q I L E L S T D I Q F S A E V K V L V 218  
**Anabaena cylindrica** N C T S T N L D W S A F G L M M D L A M M G C G T G A I I E P O Y I N Q I P P I R N L N I T I G E I G S T P K Q R R E Y T Q H I E G N A T H V G D S R E G W K S Y Q I L E L S T D I Q F S A E V K V L V 209  
**Trichormus azollae** N C T S T N L D W S A F G L M M D L A M M G C G T G A I I E P O Y I K K L P I R N R N I T V K S E I G S T P K Q R R E Y T Q H I E G N A T H V G D S R E G W E S Y Q I L E L S D I Q F S A E V K V L V 209  
  
**Nostoc sp. N6** D I S D V R K A G E T I N G F G G V A N P V K L P G L Y R C A S L N I A R G Q I N S V E C C L L I D Q A A V T I V A G N I R R S A G M Q F I A D D Q G A T A K N D L W O O Q E S G N V R I D P E R I A L R M A N 318  
**Nostoc sp. 210A** D I S D V R K A G E T I N G F G G V A N P V K L P G L Y R C A S L N I T V G Q I N S V E C C L L I D Q A A V T I V A G N I R R S A G M Q S E S S L F A D A K N D L W O O Q E S G N V R I D P E R I A L R M A N 318  
**Nostoc sp. 232** D I S D V R K A G E T I N G F G G V A N P V K L P G L Y R C A S L N I A R G Q I N S V E C C L L I D Q A A V T I V A G N I R R S A G M Q S E S S L F A D A K N D L W O O Q E S G N V R I D P E R I A L R M A N 318  
**Nostoc sp. 'Lobaria pulmonaria'** D I S D V R K S E T I N G F G G V A N P V K L P G L Y R C A S L N I A V G R Q I N S V E C C L L I D Q A A V T I V A G N I R R S A G M Q S G S V D S L F A D A K N D L W O O Q E N G N V R I D P E R I A L R M A N 318  
**Nostoc sp. 'Pellicera malacea'** D I S D V R K A G E T I N G F G G V A N P V K L P G L Y R C A S L N I T V G R Q I N S V E C C L L I D Q A A V T I V A G N I R R S A G M Q S G S E S L F A D A K N D L W O O Q E N G N V R I D P E R I A L R M A N 318  
**Nostoc punctiforme** D I S D V R K A G E T I N G F G G V A N P V K L P G L Y R C A S L N I A V G R Q I N S V E C C L L I D Q A A V T I V A G N I R R S A G M Q F I A D D E Q A T A K N D L W O O Q E N G N V R I D P E R I A L R M A N 318  
**Nostoc sp. PCC 7107** D I S D V R Q A G E T I N G F G G V A N P V K L P G L Y R C A S L N I A L G H I K N S V E C C L L I D E A A V T I V A G N I R R S A G M Q F I A D D E L G A T A K N D L W O O Q E N G N V R I D P E R I A L R M A N 318  
**Nostoc sp. PCC 7120** D I S D V R Q A G E T I N G F G G V A N P V K L P G L Y R C A S L N I A L G H I K N S V E C C L L I D E A A V T I V A G N I R R S A G M Q F I S D D Q L G A A K N D L W O O Q E N G N V R I D P E R I A L R M A N 318  
**Nostoc sp. PCC 7524** D I S D V R Q S E T I K G F G G V A N P V K L P G L Y R C A S L N I A L G H I R N S V E C C L L I D E A A V T I V A G N I R R S A G M Q F I S D D E Q A T A K N D L W O O Q E N G N V R I D P E R I A L R M A N 318  
**Anabaena variabilis** D I S D V R Q S E T I K G F G G V A N P V K L P G L Y R C A S L N I A L G H I R N S V E C C L L I D E A A V T I V A G N I R R S A G M Q F I S D D Q L G A T A K N D L W O O Q E N G N V R I D P E R I A L R M A N 318  
**Anabaena sp. PCC 7108** D I S D V R Q S E T I K G F G G M A N P V K L P G L Y R C A S L N I A I G H Q I N S V E C C L L I D E A A V T I V A G N I R R S A G M Q F S E D E Q A T A K N D L W O O Q A E G N V R I D P E R I A L R M A N 318  
**Anabaena sp. 90** D I S D V R Q S E T I K G F G G M A N P V K L P G L Y R C A S L N I A I G H Q I N S V E C C L L I D E A A V T I V A G N I R R S A G M Q F S E D E Q A T A K N D L W O O Q A E G N V R I D P E R I A L R M A N 327  
**Anabaena cylindrica** D I S D V R Q S E T I K G F G G M A N P V K L P G L Y R C A S L N I A L G H Q I N S V E C C L L I D E A A V T I V A G N I R R S A G M Q F S E D E Q A T A K N D L W O O Q A E G N V R I D P E R I A L R M A N 318  
**Trichormus azollae** D I S D V R Q S E T I K G F G G M A N P V K L P G L Y R C A S L N I A L G H Q I N S V E C C L L I D E A A V T I V A G N I R R S A G M Q F S E D E Q A T A K N D L W O O Q A E G N V R I D P E R I A L R M A N 318  
  
**Nostoc sp. N6** H T R V F H R K P T L E E C L N A V R K Q Y S S E G A I O W A G E A V A R A N D L L P I Q A L K V E F I Q A Y E G G T A K E M L K E R H S N L D A N E L E H R L O R Y A L N P C G G E I I A N F H C N L S E V H L N Q I 427  
**Nostoc sp. 210A** H T R V F H R K P T L E E C L N A V R K Q Y S S E G A I O W A G E A V A R A N D L L P I Q A L K V E F I Q A Y E G G T A K E M L K E E R Y S N L D A N E L E H R L O R Y A L N P C G G E I I G N F H C N L S E V H L N Q I 427  
**Nostoc sp. 232** H T R V F H R K P T L E E C L N A V R K Q Y S S E G A I O W A G E A V A R A N D L L P I Q A L K V E F I Q A Y E G G T A K E M L K E R S N L D A N E L E H R L O R Y A L N P C G G E I I A N F H C N L S E V H L N Q I 427  
**Nostoc sp. 'Lobaria pulmonaria'** H T R V F H R K P T L E E C I G A V R K Q Y S S E G A I O W A G E A V A R A N D L L P I Q A L K V F I Q A Y E G G T A K E M L K E R Y P N L D A N E L E H R L A R Y G L N P C G G E I I S N F H C N L S E V H L N Q I 427  
**Nostoc sp. 'Pellicera malacea'** H T R V F H R K P T L E E C I G A V R K Q Y S S E G A I O W A G E A V A R A N D L L P I Q A L K V F I Q A Y E G G T A K E M L K E E R Y N L D A N E L E H R L A R Y G L N P C G G E I I S N F H C N L S E V H L N Q I 427  
**Nostoc punctiforme** H T R V F H R K P T L E E C L N A V R K Q Y S S E G A I O W A G E A V A R A N D L L P I Q A L K V F I Q A Y E G G T A K E M L E E R Y S N L D A N E L E H R L A R Y G L N P C G G E I I S N F H C N L S E V H L N Q I 427  
**Nostoc sp. PCC 7107** H T R V F H R K P T L E E S I E A V R K Q Y S S E G A I O W A G E A V A R A N D L L P I Q A L K V D F I K Y D G I S K D M L Q O R Y P E I A K E I L K H R A R Y A N P C G G E I I S N F H C N L S E I H N Q I 427  
**Nostoc sp. PCC 7120** H T R V F H R K P T L E E S I E A V R K Q Y S S E G A I O W A G E A V A R A N D L L P I Q A L K V E F I K A Y E G G T A K M L K R H P F I D A K E L E H R L A R F G L N P C G G E I I S D F H C N L S E I H N Q I 427  
**Nostoc sp. PCC 7524** H T R V F H R K P T L E E C T N A V R K Q Y S S E G A I O W A G E A V A R A N D L L P I Q A L K V E F I K A Y E G G T A K M L K R H P F I D A K E L E H R L A R F G L N P C G G E I I S D F H C N L S E I H N Q I 427  
**Anabaena variabilis** H T R V F H R K P T L E E C V D A V R K Q Y S S E G A I O W A G E A V A R A N D L L P I Q A L K V E F I K A Y E G G T A K M L K E Y H P F I D E K E L E H R L A R Y G L N P C G G E I I S N F H C N L S E I H L N Q I 427  
**Anabaena sp. PCC 7108** H T R V F H R K P T L E E S I A V R K Q Y S S E G A I O W A G E A V A R A N D L L P I E L K H D F I Q A Y E G G V E Q M I K E Y H P K I D A D E L E H R I G R Y G L N P C G G E I I A D F H C N L S E V H L N Q I 427  
**Anabaena sp. 90** H S R V F H R K P T L E E S I A V R K Q Y S S E G A I O W A G E A V A R A N D L L N I P E L K H F I Q A Y E G G V E Q M I Q E R H P I D S Q E L E H R I G R Y G L N P C G G E I I V G N F H C N L S E V H L N Q I 436  
**Anabaena cylindrica** H T R V F H R K P T L E E S I A V R K Q Y S S E G A I O W A G E A V A R A N D L L N I P E L K H D F I Q A Y E G G V E Q M I Q E R H P I D I A Q E L E H R I G R Y G L N P C G G E I I A D F H C N L S E V H L N Q I 427  
**Trichormus azollae** H T R V F H R K P T L E E S I G A V R K Q Y S S E G A I O W A G E A V A R A N D L L N I P E L T E T F I Q A Y E G G A Q Q D M I K E Y P E I P D E L E H R I G R Y G L N P C G G E I I S N F H C N L S E V H L N Q I 427

**Figure S12.** Multiple protein sequence alignment of NrdJ ribonucleoside-diphosphate reductases from selected *Nostoc* and *Anabaena* strains with *in silico* excised intervening sequences. Conserved sites of insertions are marked with red (introns), yellow (group I introns) and green (group II intron). The alignment was generated using ClustalOmega (Stievers et al., 2011) and visualized in JalView (Waterhouse et al., 2009).



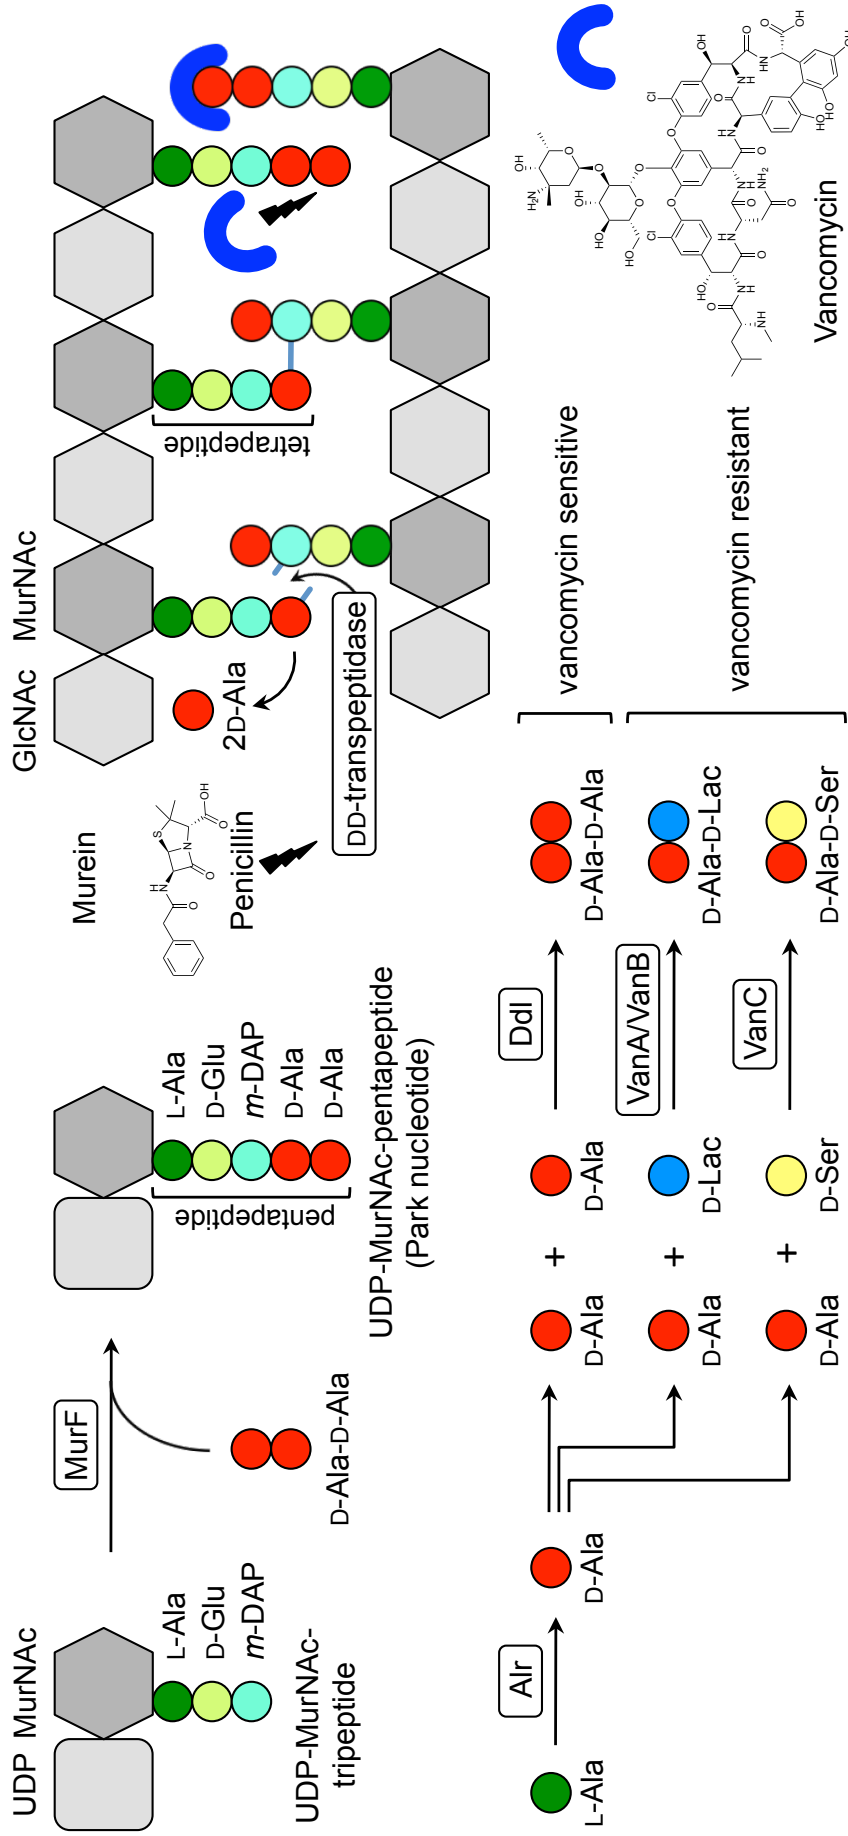

**Figure S13.** Simplified scheme of murein (DAP-type) biosynthesis. UDP, undecaprenyl moiety; MurNAC, *N*-acetylmuramoyl moiety; GlcNAc, *N*-acetylglucosamine moiety; *m*-DAP, *meso*-diaminopimelic acid. Key enzymes are shown boxed. MurF, UDP-*N*-acetylmuramoyl-L-tripeptide-D-alanyl-D-alanine ligase; DD-transpeptidase, D-Ala-D-Ala transpeptidase; Alr, alanine racemase; Ddl, D-alanine-D-alanine ligase; VanA/VanB, D-alanine-D-lactate ligase; VanC, D-alanine-D-serine ligase.



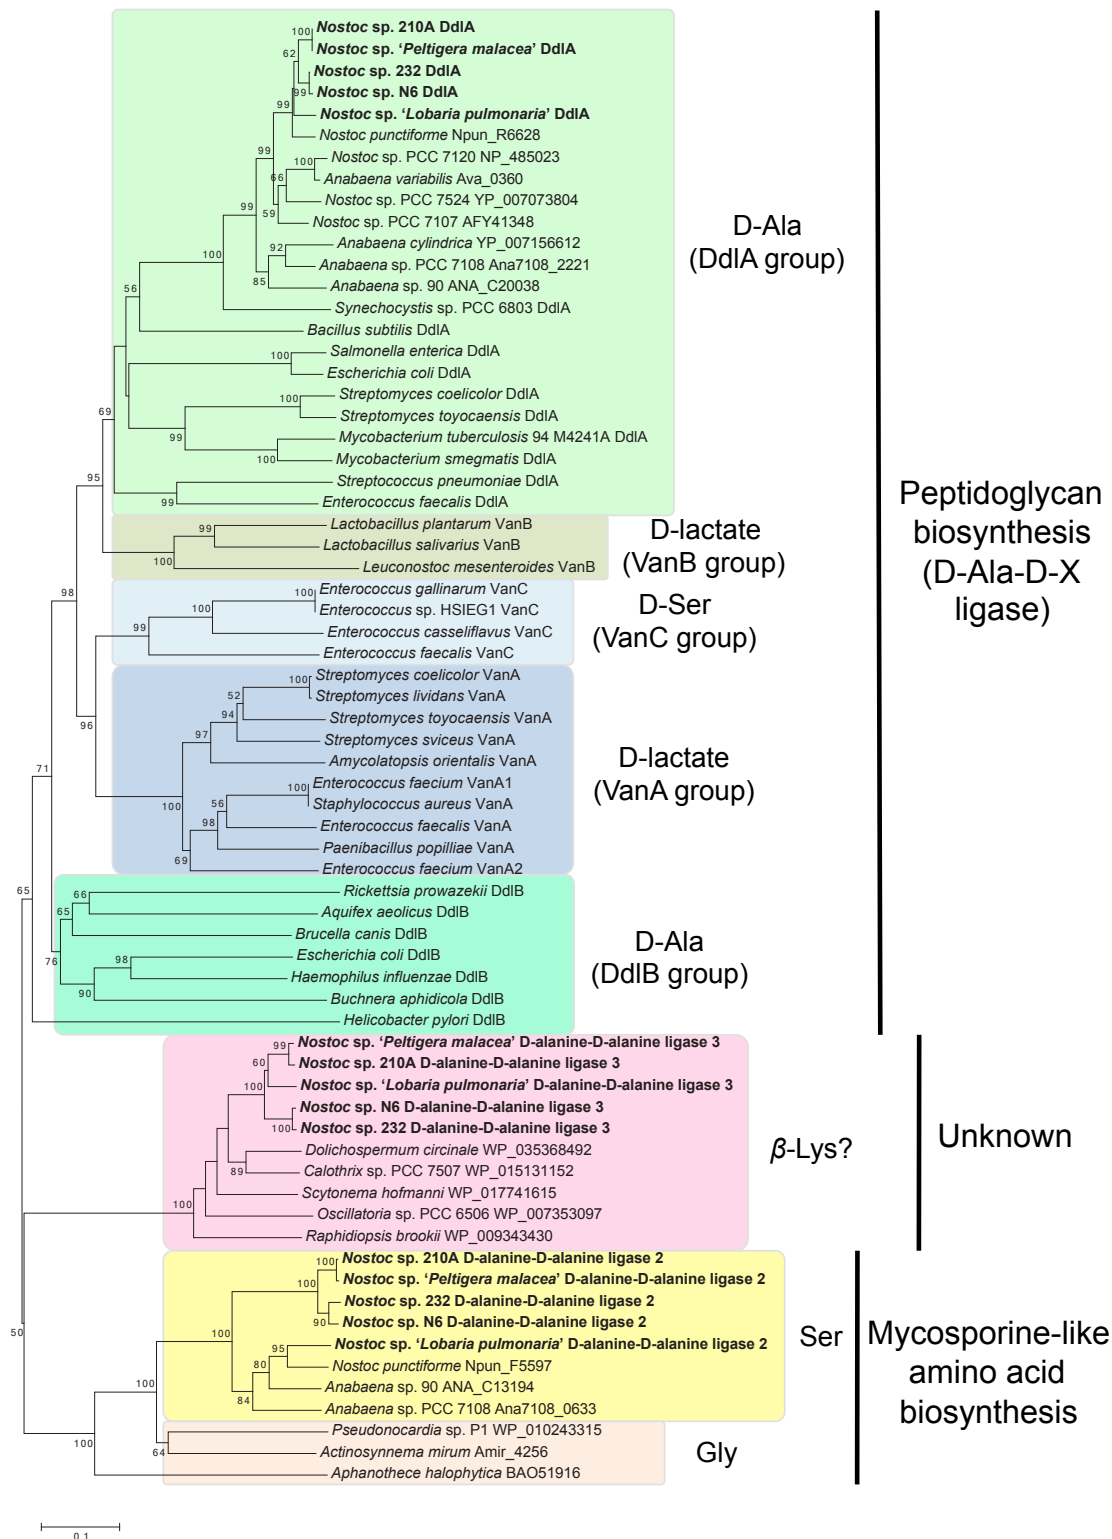

**Figure S14.** Neighbor-joining phylogenetic tree based on the protein sequences of selected D-Ala-D-Ala ATP grasp ligases. The enzymes found in lichen-associated *Nostoc* strains are shown in bold). Numbers at branch nodes are bootstrap percentages (based on 1000 resamplings). Substrates and proposed functions are shown on the right. Bar, 10% sequence divergence.

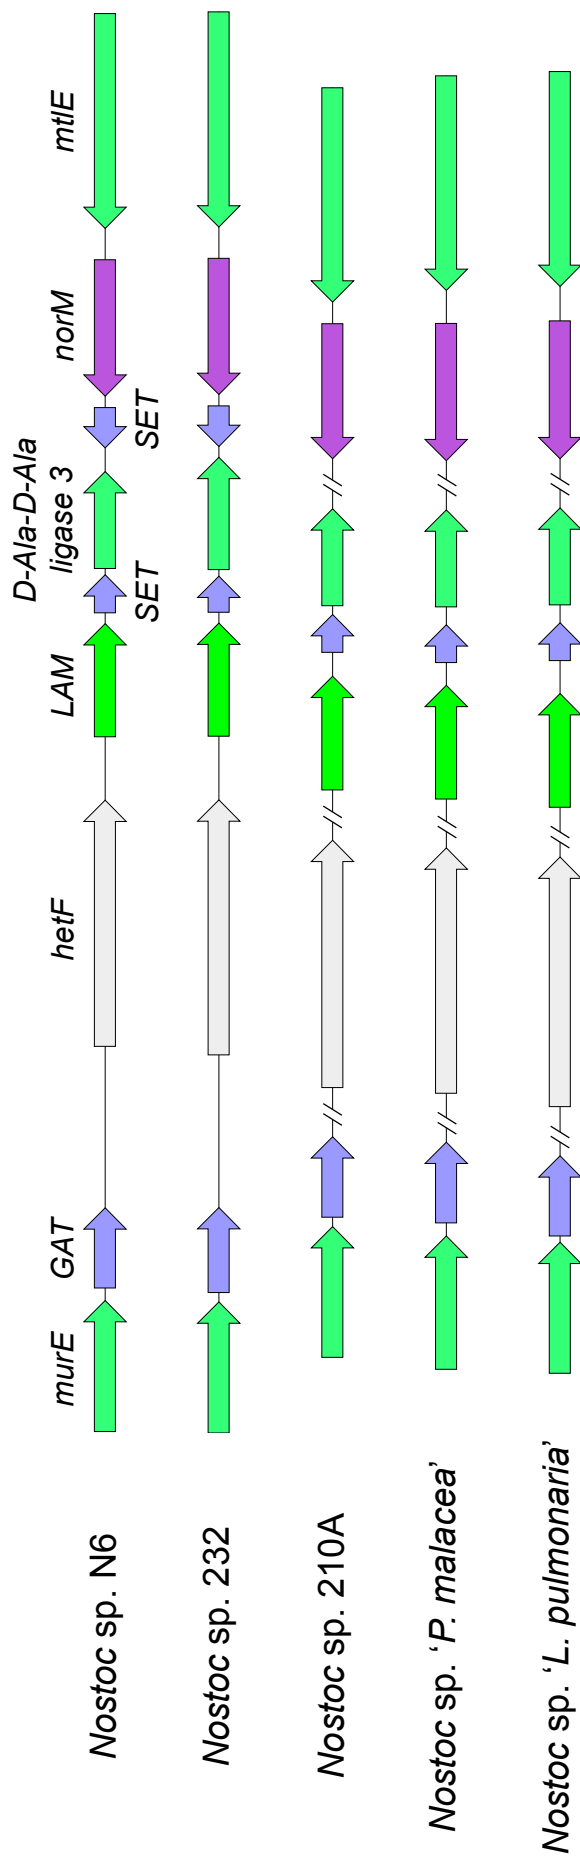

**Figure S15.** *D-Ala-D-Ala ligase 3* gene clusters of lichen-associated *Nostoc* strains. Gene abbreviations: *murf*, UDP-*N*-acetylmuramoylalanyl-D-glutamate-2,6-diaminopimelate ligase; *GAT*, CobQ-like glutamine amidotransferase; *hetF*, heterocyst differentiation protein; *LAM*, lysine 2,3-aminomutase; *SET*, lysine methyltransferase; *norM*, MATE family efflux pump; *mtIE*, soluble lytic murein transglycosylase. A broken genome line indicates separate loci.

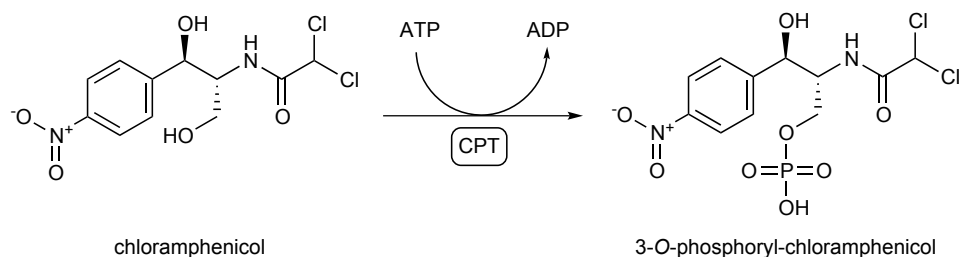

**Figure S16.** Phosphorylation of chloramphenicol by chloramphenicol phosphotransferase (CPT).

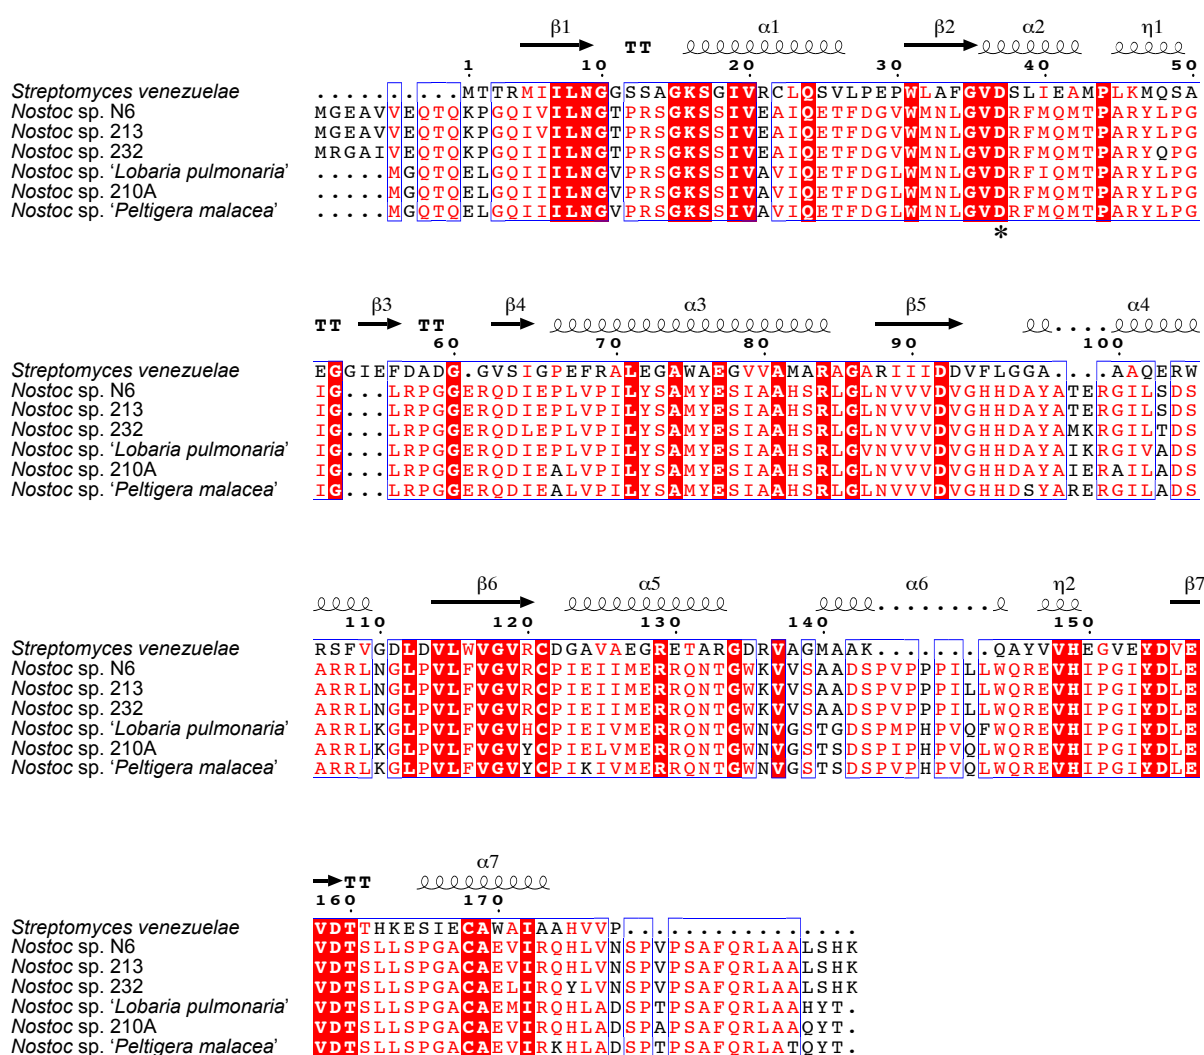

**Figure S17.** Protein sequence alignment of chloramphenicol phosphotransferases (CPTs) from the chloramphenicol producer *Streptomyces venezuelae* and lichen-associated *Nostoc* strains. The secondary structure information and numbering are displayed for the *S. venezuelae* CPT (PDB accession 1QHY; Izard and Ellis, 2000). The conserved catalytic aspartic acid residue (Asp37) is indicated with an asterisk. The alignment was generated with ESPrnt 3 (Robert and Gouet, 2014).

## *Nostoc* sp. N6 nos

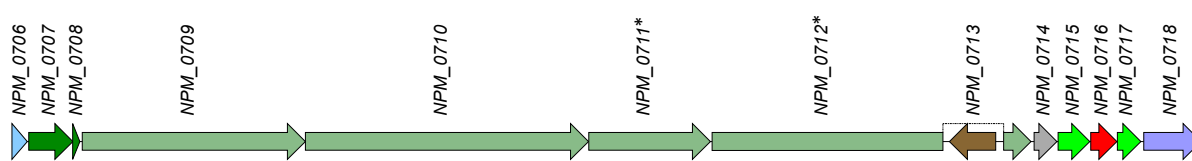

| ORF       | Protein size, aa  | Proposed function                 | Closest homolog (origin)                                     | % identity | GenBank accession number |
|-----------|-------------------|-----------------------------------|--------------------------------------------------------------|------------|--------------------------|
| NPM_0706  | 179               | 4-hydroxybenzoate synthetase      | <i>Nostoc</i> sp. NIES-3756                                  | 85         | BAT53516                 |
| NPM_0707  | 513               | AMP-dependent synthetase/ligase   | <i>Nostoc</i> sp. NIES-3756                                  | 84         | BAT53517                 |
| NPM_0708  | 83                | acyl carrier protein              | <i>Nostoc</i> sp. NIES-3756                                  | 78         | BAT53518                 |
| NPM_0709  | 2603              | NRPS <sup>a</sup>                 | <i>Nostoc</i> sp. ' <i>Peltigera membranacea</i> cyanobiont' | 99         | ADL59761                 |
| NPM_0710  | 3302              | NRPS <sup>b</sup>                 | <i>Nostoc</i> sp. ' <i>P. membranacea</i> cyanobiont'        | 99         | ADL59762                 |
| NPM_0711* | 1418 <sup>c</sup> | PKS <sup>d</sup>                  | <i>Nostoc</i> sp. ' <i>P. membranacea</i> cyanobiont'        | 99         | ADL59763                 |
| NPM_0712* | 3474 <sup>e</sup> | NRPS <sup>f</sup>                 | <i>Nostoc</i> sp. ' <i>P. membranacea</i> cyanobiont'        | 99         | ADL59764                 |
| NPM_0713  | 541               | <i>IS1634</i> transposase         | <i>Calothrix</i> sp. PCC 6303                                | 78         | AFZ00424                 |
| NPM_0714  | 265               | hypothetical protein              | <i>Nostoc</i> sp. ' <i>P. membranacea</i> cyanobiont'        | 99         | ADL59765                 |
| NPM_0715  | 367               | alcohol dehydrogenase             | <i>Nostoc</i> sp. ' <i>P. membranacea</i> cyanobiont'        | 100        | ADL59766                 |
| NPM_0716  | 303               | JmjC domain protein               | <i>Nostoc</i> sp. ' <i>P. membranacea</i> cyanobiont'        | 99         | ADL59767                 |
| NPM_0717  | 273               | pyrroline-5-carboxylate reductase | <i>Nostoc</i> sp. ' <i>P. membranacea</i> cyanobiont'        | 99         | ADL59768                 |
| NPM_0718  | 669               | ABC transporter                   | <i>Nostoc</i> sp. ' <i>P. membranacea</i> cyanobiont'        | 99         | ADL59769                 |

<sup>a</sup> Deduced architecture of the encoded NRPS protein is C–A–PCP–C–A–MeT–PCP.

<sup>b</sup> Deduced architecture of the encoded NRPS protein is C–A–PCP–C–A–PCP–C–A–PCP.

<sup>c</sup> The size of the closest homolog (ADL59763).

<sup>d</sup> Deduced architecture of the encoded PKS protein is KS–AT–MeT–ACP.

<sup>e</sup> The size of the closest homolog (ADL59764).

<sup>f</sup> Deduced architecture of the encoded NRPS protein is C–A–PCP–C–A–PCP–E–C–PCP–TE.

**Figure S18.** Gene clusters encoding glycolipid synthases (Hgl), polyketide synthases (PKSs) and non-ribosomal peptide synthases (NRPSs) in the *Nostoc* sp. N6 and *Nostoc* sp. '*Lobaria pulmonaria* cyanobiont' genomes. KS,  $\beta$ -ketoacyl synthase; KS<sup>0</sup>, nonelongating KS; AT, acyltransferase; DH, dehydratase; ER, enoyl reductase; KR, ketoreductase; ACP, acyl carrier protein; TE, thioesterase; MeT, methyltransferase; CR, crotonase (enoyl-CoA hydratase); C, condensation domain; A, adenylation domain; PCP, peptidyl carrier protein; AS, acyl-CoA synthetase (fatty acyl-AMP ligase); E, epimerization domain; GA, glyceric acid transferase; S, sulfotransferase; GNAT, GCN5-related *N*-acetyltransferase family; R, C-terminal reductase; ?, unknown. Pseudogenes are denoted with an asterisk (\*).

## Nostoc sp. N6 ncp

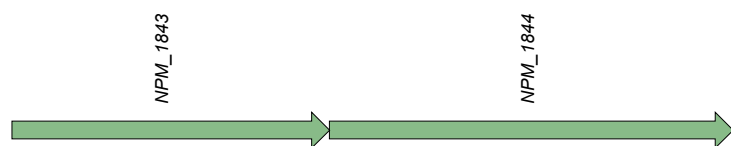

| ORF      | Protein size, aa | Proposed function | Closest homolog (origin)     | % identity | GenBank accession number |
|----------|------------------|-------------------|------------------------------|------------|--------------------------|
| NPM_1843 | 3705             | NRPS <sup>a</sup> | <i>Nostoc</i> sp. ATCC 53789 | 94         | AAO23333                 |
| NPM_1844 | 4710             | NRPS <sup>b</sup> | <i>Nostoc</i> sp. ATCC 53789 | 81         | AAO23334                 |

<sup>a</sup> Deduced architecture of the encoded NRPS protein is C-A-PCP-C-A-PCP-C-A-PCP-E.

<sup>b</sup> Deduced architecture of the encoded NRPS protein is C-A-PCP-C-A-PCP-C-A-PCP-C-A-PCP-R.

## Nostoc sp. N6 nsp

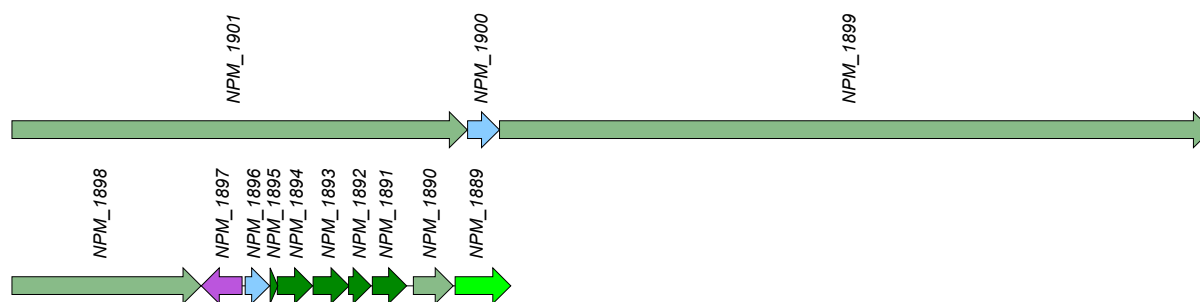

| ORF                      | Protein size, aa | Proposed function                       | Closest homolog (origin)                                     | % identity | GenBank accession number |
|--------------------------|------------------|-----------------------------------------|--------------------------------------------------------------|------------|--------------------------|
| NPM_1889 ( <i>nspM</i> ) | 647              | asparagine synthase                     | <i>Nostoc</i> sp. ' <i>Peltigera membranacea</i> cyanobiont' | 99         | ADA69249                 |
| NPM_1890 ( <i>nspL</i> ) | 464              | cytochrome P450                         | <i>Nostoc</i> sp. ' <i>P. membranacea</i> cyanobiont'        | 100        | ADA69248                 |
| NPM_1891 ( <i>nspK</i> ) | 400              | acyltransferase                         | <i>Nostoc</i> sp. ' <i>P. membranacea</i> cyanobiont'        | 99         | ADA69247                 |
| NPM_1892 ( <i>nspJ</i> ) | 262              | enoyl-CoA hydratase                     | <i>Nostoc</i> sp. ' <i>P. membranacea</i> cyanobiont'        | 100        | ADA69246                 |
| NPM_1893 ( <i>nspI</i> ) | 420              | 3-hydroxy-3-methylglutaryl-ACP synthase | <i>Nostoc</i> sp. ' <i>P. membranacea</i> cyanobiont'        | 100        | ADA69245                 |
| NPM_1894 ( <i>nspH</i> ) | 411              | $\beta$ -ketoacyl synthase              | <i>Nostoc</i> sp. ' <i>P. membranacea</i> cyanobiont'        | 100        | ADA69244                 |
| NPM_1895 ( <i>nspG</i> ) | 90               | acyl carrier protein                    | <i>Nostoc</i> sp. ' <i>P. membranacea</i> cyanobiont'        | 100        | ADA71314                 |
| NPM_1896 ( <i>nspF</i> ) | 285              | O-methyltransferase                     | <i>Nostoc</i> sp. ' <i>P. membranacea</i> cyanobiont'        | 99         | ADA69243                 |
| NPM_1897 ( <i>nspE</i> ) | 474              | MATE family efflux transporter          | <i>Nostoc</i> sp. ' <i>P. membranacea</i> cyanobiont'        | 99         | ADA69242                 |
| NPM_1898 ( <i>nspD</i> ) | 2206             | PKS <sup>a</sup>                        | <i>Nostoc</i> sp. ' <i>P. membranacea</i> cyanobiont'        | 98         | ADA69241                 |
| NPM_1899 ( <i>nspC</i> ) | 8304             | trans-AT PKS-NRPS <sup>b</sup>          | <i>Nostoc</i> sp. ' <i>P. membranacea</i> cyanobiont'        | 97         | ADA69239                 |
| NPM_1900 ( <i>nspB</i> ) | 371              | luciferase-like monooxygenase           | <i>Nostoc</i> sp. ' <i>P. membranacea</i> cyanobiont'        | 99         | ADA69238                 |
| NPM_1901 ( <i>nspA</i> ) | 5320             | trans-AT PKS <sup>c</sup>               | <i>Nostoc</i> sp. ' <i>P. membranacea</i> cyanobiont'        | 98         | ADA69237                 |

<sup>a</sup> Deduced architecture of the encoded PKS protein is KS-AT-KR-ER-ACP-TE.

<sup>b</sup> Deduced architecture of the encoded PKS-NRPS protein is KS<sup>0</sup>-ACP-C-A-PCP-KS-DH-KR-MeT-ACP-KS<sup>0</sup>-DH-ACP-KS-KR-MeT-ACP-KS<sup>0</sup>-ACP-C-A-PCP.

<sup>c</sup> Deduced architecture of the encoded PKS protein is GNAT-ACP-KS-KR-MeT-ACP-KS-CR-CR-ACP-ACP-KS-?-KR-ACP-ACP.

Figure S18. Continued.

### *Nostoc* sp. N6 *nrps1*

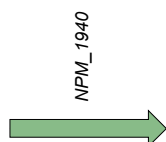

| ORF      | Protein size, aa | Proposed function | Closest homolog (origin)     | % identity | GenBank accession number |
|----------|------------------|-------------------|------------------------------|------------|--------------------------|
| NPM_1940 | 1826             | NRPS <sup>a</sup> | <i>Nostoc</i> sp. ATCC 53789 | 82         | AAO23333                 |

<sup>a</sup> Deduced architecture of the encoded NRPS protein is C–A–PCP–C–A (partial).

### *Nostoc* sp. N6 *nrps2*

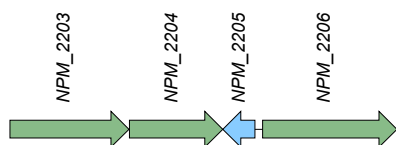

| ORF      | Protein size, aa | Proposed function        | Closest homolog (origin)            | % identity | GenBank accession number |
|----------|------------------|--------------------------|-------------------------------------|------------|--------------------------|
| NPM_2203 | 1390             | NRPS <sup>a</sup>        | <i>Scytonema hofmanni</i> UTEX 2349 | 88         | WP_029631596             |
| NPM_2204 | 1090             | NRPS <sup>b</sup>        | <i>S. hofmanni</i> UTEX 2349        | 91         | WP_029631594             |
| NPM_2205 | 375              | $\alpha/\beta$ hydrolase | <i>S. hofmanni</i> UTEX 2349        | 94         | WP_029631593             |
| NPM_2206 | 1568             | NRPS <sup>c</sup>        | <i>S. hofmanni</i> PCC 7110         | 88         | WP_051077115             |

<sup>a</sup> Deduced architecture of the encoded NRPS protein is C–A–PCP–TE.

<sup>b</sup> Deduced architecture of the encoded NRPS protein is C–A–PCP.

<sup>c</sup> Deduced architecture of the encoded NRPS protein is C–A–MeT–PCP.

**Figure S18.** *Continued.*

## Nostoc sp. N6 nrps3

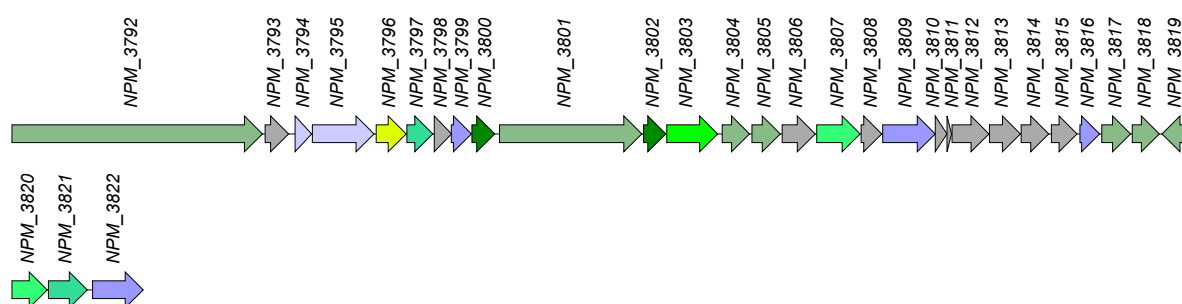

| ORF      | Protein size, aa | Proposed function                                 | Closest homolog (origin)                 | % identity | GenBank accession number |
|----------|------------------|---------------------------------------------------|------------------------------------------|------------|--------------------------|
| NPM_3792 | 2922             | NRPS <sup>a</sup>                                 | <i>Planktothrix agardhii</i> NIES-205    | 67         | ABW84363                 |
| NPM_3793 | 274              | hypothetical protein                              | <i>P. agardhii</i> NIVA-CYA 126          | 67         | CAM59602                 |
| NPM_3794 | 192              | adenyl-sulfate kinase                             | <i>Nostoc punctiforme</i> PCC 73102      | 77         | ACC83034                 |
| NPM_3795 | 720              | (2Fe-2S) ferredoxin                               | <i>P. prolifica</i> NIVA-CYA 98          | 57         | CAQ48268                 |
| NPM_3796 | 351              | isopentenyl pyrophosphate isomerase               | <i>Nodularia spumigena</i> CCY9414       | 86         | EAW46435                 |
| NPM_3797 | 301              | permease                                          | <i>Mastigocladus laminosus</i> UU774     | 52         | KIY09608                 |
| NPM_3798 | 202              | bacilysin biosynthesis protein BacA               | <i>P. agardhii</i> NIVA-CYA 126          | 61         | CAM59603                 |
| NPM_3799 | 235              | cupin                                             | <i>P. rubescens</i> NIVA-CYA 407         | 53         | WP_026785726             |
| NPM_3800 | 264              | short-chain dehydrogenase/reductase               | <i>P. agardhii</i> NIVA-CYA 126          | 73         | CAM59605                 |
| NPM_3801 | 1658             | NRPS <sup>b</sup>                                 | <i>Moorea producens</i> JHB              | 63         | AKV71859                 |
| NPM_3802 | 258              | short-chain dehydrogenase/reductase               | <i>M. producens</i> JHB                  | 83         | AKV71860                 |
| NPM_3803 | 595              | peptide ABC transporter substrate-binding protein | <i>Criminalium epipsammum</i> PCC 9333   | 57         | AFZ13263                 |
| NPM_3804 | 320              | 2OG-Fe(II) oxygenase                              | <i>P. prolifica</i> NIVA-CYA 98          | 40         | CAQ48273                 |
| NPM_3805 | 329              | 2OG-Fe(II) oxygenase                              | <i>Myxosarcina</i> sp. GI1               | 39         | WP_052055871             |
| NPM_3806 | 385              | hypothetical protein                              | <i>Dolichospermum circinale</i> AWQC310F | 59         | WP_035371543             |
| NPM_3807 | 506              | D-alanyl-lipoteichoic acid acyltransferase DltB   | <i>M. producens</i> 3L                   | 67         | EGJ31355                 |
| NPM_3808 | 240              | hypothetical protein                              | <i>Bacillus methanolicus</i> MGA3        | 50         | EIJ77741                 |
| NPM_3809 | 612              | carbamoyltransferase                              | <i>Aphanizomenon flos-aquae</i> NH-5     | 84         | ACG63816                 |
| NPM_3810 | 135              | hypothetical protein                              | <i>A. flos-aquae</i> NH-5                | 60         | ACG63817                 |
| NPM_3811 | 54               | hypothetical protein                              | <i>Arthrospira maxima</i> CS-328         | 69         | EDZ96930                 |
| NPM_3812 | 430              | GDSL-like lipase                                  | <i>A. flos-aquae</i> NH-5                | 52         | ACG63819                 |
| NPM_3813 | 362              | GDSL-like lipase                                  | candidate division TA06 bacterium DG_24  | 24         | KPJ53805                 |
| NPM_3814 | 321              | hypothetical protein                              | Oscillatoriales cyanobacterium MTP1      | 56         | WP_058881380             |
| NPM_3815 | 299              | hypothetical protein                              | Oscillatoriales cyanobacterium MTP1      | 60         | WP_058881380             |
| NPM_3816 | 227              | radical SAM protein                               | <i>Beggiatoa</i> sp. PS                  | 50         | EDN71334                 |
| NPM_3817 | 335              | 2OG-Fe(II) oxygenase                              | <i>Gloeocapsa</i> sp. PCC 7428           | 43         | AFZ31754                 |
| NPM_3818 | 317              | 2OG-Fe(II) oxygenase                              | <i>Fischerella</i> sp. PCC 9605          | 41         | WP_026731186             |
| NPM_3819 | 277              | aldo/keto reductase                               | <i>Leptolyngbya</i> sp. JSC-1            | 68         | WP_036005646             |
| NPM_3820 | 413              | glycosyltransferase                               | <i>P. agardhii</i> NIVA-CYA 126          | 55         | CAM59608                 |
| NPM_3821 | 454              | MFS transporter                                   | <i>D. circinale</i> AWQC310F             | 57         | WP_051289538             |
| NPM_3822 | 590              | ABC transporter                                   | <i>Nostoc punctiforme</i> PCC 73102      | 78         | ACC81026                 |

<sup>a</sup> Deduced architecture of the encoded NRPS protein is GA-ACP-S-C-A-PCP-E.

<sup>b</sup> Deduced architecture of the encoded NRPS protein is C-A-PCP-C-PCP.

Figure S18. Continued.

## *Nostoc* sp. N6 *nrps4*

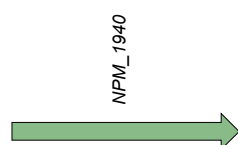

| ORF      | Protein size, aa | Proposed function | Closest homolog (origin)         | % identity | GenBank accession number |
|----------|------------------|-------------------|----------------------------------|------------|--------------------------|
| NPM_4088 | 2652             | NRPS <sup>a</sup> | <i>Geitlerinema</i> sp. PCC 7105 | 54         | WP_017663026             |

<sup>a</sup> Deduced architecture of the encoded NRPS protein is C–A–PCP–C–A–PCP–R.

## *Nostoc* sp. N6 *pk1*

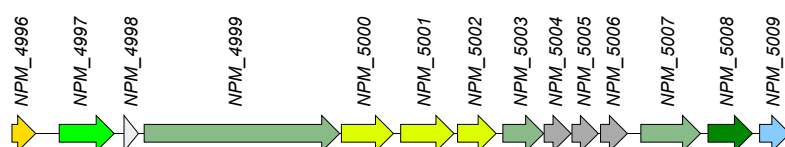

| ORF      | Protein size, aa | Proposed function                          | Closest homolog (origin)                                     | % identity | GenBank accession number |
|----------|------------------|--------------------------------------------|--------------------------------------------------------------|------------|--------------------------|
| NPM_4996 | 278              | DNA-binding response regulator             | <i>Tolypothrix campylonemoides</i> VB511288                  | 69         | KIJ79159                 |
| NPM_4997 | 641              | asparagine synthetase B                    | <i>Microcoleus</i> sp. PCC 7113                              | 67         | AFZ22237                 |
| NPM_4998 | 166              | protein of unknown function (DUF302)       | <i>Fischerella muscicola</i> PCC 7414                        | 60         | WP_016860191             |
| NPM_4999 | 2281             | PKS <sup>a</sup>                           | <i>Nostoc</i> sp. ' <i>Peltigera membranacea</i> cyanobiont' | 99         | AGK38335                 |
| NPM_5000 | 606              | geranylgeranyl reductase family protein    | <i>Nostoc</i> sp. ' <i>P. membranacea</i> cyanobiont'        | 99         | AGK38334                 |
| NPM_5001 | 623              | geranylgeranyl reductase family protein    | <i>Nostoc</i> sp. ' <i>P. membranacea</i> cyanobiont'        | 99         | AGK38336                 |
| NPM_5002 | 451              | aldehyde dehydrogenase                     | <i>Nostoc</i> sp. ' <i>P. membranacea</i> cyanobiont'        | 97         | AGK38337                 |
| NPM_5003 | 475              | 9- <i>cis</i> -epoxycarotenoid dioxygenase | <i>Nostoc</i> sp. ' <i>P. membranacea</i> cyanobiont'        | 99         | AGK38338                 |
| NPM_5004 | 313              | protein of unknown function (DUF1702)      | <i>Nostoc</i> sp. ' <i>P. membranacea</i> cyanobiont'        | 99         | AGK38339                 |
| NPM_5005 | 307              | protein of unknown function (DUF1702)      | <i>Nostoc</i> sp. ' <i>P. membranacea</i> cyanobiont'        | 97         | AGK38340                 |
| NPM_5006 | 311              | protein of unknown function (DUF1702)      | <i>Nostoc</i> sp. ' <i>P. membranacea</i> cyanobiont'        | 99         | AGK38341                 |
| NPM_5007 | 695              | hemolysin-type calcium-binding protein     | <i>Nostoc</i> sp. ' <i>P. membranacea</i> cyanobiont'        | 99         | AGK38342                 |
| NPM_5008 | 517              | cholesterol oxidase                        | <i>Nostoc</i> sp. ' <i>P. membranacea</i> cyanobiont'        | 96         | AGK38343                 |
| NPM_5009 | 352              | prenyltransferase UbiA                     | <i>Nostoc</i> sp. ' <i>P. membranacea</i> cyanobiont'        | 99         | AGK38344                 |

<sup>a</sup> Deduced architecture of the encoded PKS protein is KS–AT–ACP–ACP–KR–DH.

Figure S18. Continued.



## Nostoc sp. N6 nrps5

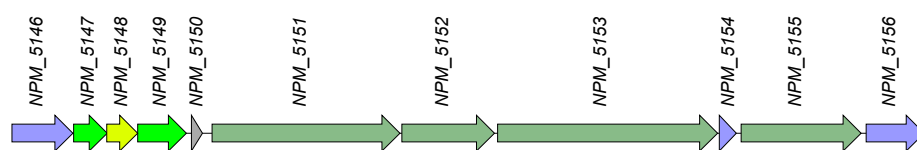

| ORF      | Protein size, aa | Proposed function                           | Closest homolog (origin)                                     | % identity | GenBank accession number |
|----------|------------------|---------------------------------------------|--------------------------------------------------------------|------------|--------------------------|
| NPM_5146 | 711              | patatin                                     | <i>Mastigocladus laminosus</i> UU774                         | 68         | KIY11706                 |
| NPM_5147 | 392              | 2-isopropylmalate synthase                  | <i>Nostoc punctiforme</i> PCC 73102                          | 80         | ACC81025                 |
| NPM_5148 | 360              | 3-isopropylmalate dehydrogenase             | <i>N. punctiforme</i> PCC 73102                              | 89         | ACC81018                 |
| NPM_5149 | 569              | 3-isopropylmalate dehydratase large subunit | <i>N. punctiforme</i> PCC 73102                              | 88         | ACC81019                 |
| NPM_5150 | 130              | hypothetical protein                        | <i>Nostoc</i> sp. ' <i>Peltigera membranacea</i> cyanobiont' | 74         | AGH69799                 |
| NPM_5151 | 2191             | NRPS <sup>a</sup>                           | <i>Scytonema hofmanni</i> PCC 7110                           | 78         | WP_017742642             |
| NPM_5152 | 1079             | NRPS <sup>b</sup>                           | <i>N. punctiforme</i> PCC 73102                              | 81         | ACC81022                 |
| NPM_5153 | 2566             | NRPS <sup>c</sup>                           | <i>N. punctiforme</i> PCC 73102                              | 79         | ACC81023                 |
| NPM_5154 | 198              | protein of unknown function (DUF820)        | <i>Microcystis aeruginosa</i> PCC 9806                       | 76         | CCI16695                 |
| NPM_5155 | 1401             | NRPS <sup>d</sup>                           | <i>N. punctiforme</i> PCC 73102                              | 81         | ACC81024                 |
| NPM_5156 | 677              | ABC transporter                             | <i>N. punctiforme</i> PCC 73102                              | 80         | ACC81026                 |

<sup>a</sup> Deduced architecture of the encoded NRPS protein is A-PCP-C-A-PCP-E.

<sup>b</sup> Deduced architecture of the encoded NRPS protein is C-A-PCP.

<sup>c</sup> Deduced architecture of the encoded NRPS protein is C-A-PCP-C-A-MeT-PCP.

<sup>d</sup> Deduced architecture of the encoded NRPS protein is C-A-PCP-TE.

## Nostoc sp. N6 hgl

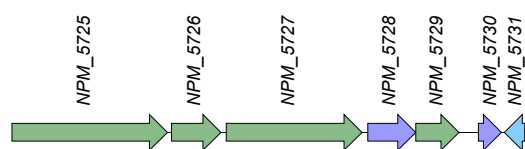

| ORF      | Protein size, aa | Proposed function                                                       | Closest homolog (origin)                                     | % identity | GenBank accession number |
|----------|------------------|-------------------------------------------------------------------------|--------------------------------------------------------------|------------|--------------------------|
| NPM_5725 | 1814             | heterocyst glycolipid synthase HglE <sup>a</sup>                        | <i>Nostoc</i> sp. ' <i>Peltigera membranacea</i> cyanobiont' | 99         | AGJ76601                 |
| NPM_5726 | 575              | heterocyst glycolipid ketoreductase HglG                                | <i>Nostoc</i> sp. ' <i>P. membranacea</i> cyanobiont'        | 99         | AGJ76602                 |
| NPM_5727 | 1582             | heterocyst glycolipid synthase HglC <sup>b</sup>                        | <i>Nostoc</i> sp. ' <i>P. membranacea</i> cyanobiont'        | 98         | AGJ76603                 |
| NPM_5728 | 558              | heterocyst glycolipid enoyl reductase PfaD (2-nitropropane dioxygenase) | <i>Nostoc</i> sp. ' <i>P. membranacea</i> cyanobiont'        | 99         | AGJ76604                 |
| NPM_5729 | 504              | heterocyst glycolipid synthase HglB <sup>c</sup>                        | <i>Nostoc</i> sp. ' <i>P. membranacea</i> cyanobiont'        | 100        | AGJ76605                 |
| NPM_5730 | 267              | short-chain dehydrogenase/reductase                                     | <i>Nostoc</i> sp. ' <i>P. membranacea</i> cyanobiont'        | 100        | AGJ76606                 |
| NPM_5731 | 236              | 4'-phosphopantetheinyl transferase                                      | <i>Nostoc</i> sp. ' <i>P. membranacea</i> cyanobiont'        | 99         | AGJ76607                 |

<sup>a</sup> Deduced architecture of the encoded protein is KS-MAT-ACP-ACP-KR.

<sup>b</sup> Deduced architecture of the encoded protein is KS-CLF-AT.

<sup>c</sup> Deduced architecture of the encoded protein is ACP-TE.

Figure S18. Continued.

## Nostoc sp. N6 pks2

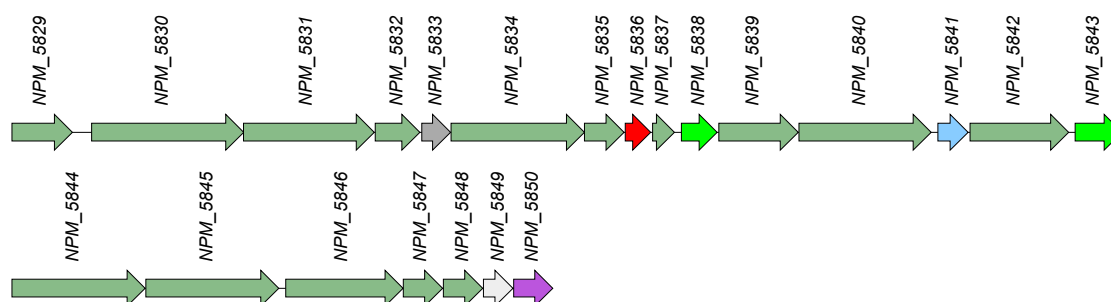

| ORF      | Protein size, aa | Proposed function                                         | Closest homolog (origin)                                     | % identity | GenBank accession number |
|----------|------------------|-----------------------------------------------------------|--------------------------------------------------------------|------------|--------------------------|
| NPM_5829 | 705              | 7-beta-(4-carboxybutanamido) cephalosporanic acid acylase | <i>Fischerella muscicola</i> PCC 7414                        | 86         | WP_026086800             |
| NPM_5830 | 1775             | NRPS <sup>a</sup>                                         | <i>Fischerella</i> sp. PCC 9339                              | 72         | WP_017307786             |
| NPM_5831 | 1525             | PKS <sup>b</sup>                                          | <i>Nostoc</i> sp. ' <i>Peltigera membranacea</i> cyanobiont' | 92         | AGH69811                 |
| NPM_5832 | 522              | condensation domain protein                               | <i>Nostoc</i> sp. ' <i>P. membranacea</i> cyanobiont'        | 99         | AGH69812                 |
| NPM_5833 | 336              | taurine catabolism dioxygenase TauD/TfdA                  | <i>Nostoc</i> sp. ' <i>P. membranacea</i> cyanobiont'        | 99         | AGH69813                 |
| NPM_5834 | 1557             | NRPS <sup>c</sup>                                         | <i>Nostoc</i> sp. ' <i>P. membranacea</i> cyanobiont'        | 99         | AGH69814                 |
| NPM_5835 | 462              | condensation domain protein                               | <i>Nostoc</i> sp. ' <i>P. membranacea</i> cyanobiont'        | 100        | AGH69815                 |
| NPM_5836 | 294              | JmjC domain protein                                       | <i>Nostoc</i> sp. ' <i>P. membranacea</i> cyanobiont'        | 100        | AGH69816                 |
| NPM_5837 | 254              | methyltransferase                                         | <i>Nostoc</i> sp. ' <i>P. membranacea</i> cyanobiont'        | 100        | AGH69817                 |
| NPM_5838 | 418              | diaminobutyrate-2-oxoglutarate transaminase               | <i>Nostoc</i> sp. ' <i>P. membranacea</i> cyanobiont'        | 99         | AGH69818                 |
| NPM_5839 | 926              | NRPS <sup>d</sup>                                         | <i>Nostoc</i> sp. ' <i>P. membranacea</i> cyanobiont'        | 98         | AGH69819                 |
| NPM_5840 | 1542             | PKS <sup>b</sup>                                          | <i>Nostoc</i> sp. ' <i>P. membranacea</i> cyanobiont'        | 99         | AGH69820                 |
| NPM_5841 | 354              | luciferase-like monooxygenase                             | <i>Nostoc</i> sp. ' <i>P. membranacea</i> cyanobiont'        | 100        | AGH69821                 |
| NPM_5842 | 1150             | NRPS <sup>e</sup>                                         | <i>Nostoc</i> sp. ' <i>P. membranacea</i> cyanobiont'        | 99         | AGH69822                 |
| NPM_5843 | 547              | pyridoxal-dependent decarboxylase                         | <i>Nostoc</i> sp. ' <i>P. membranacea</i> cyanobiont'        | 99         | AGH69823                 |
| NPM_5844 | 1553             | PKS <sup>b</sup>                                          | <i>Scytonema hofmanni</i> UTEX 2349                          | 74         | WP_038296496             |
| NPM_5845 | 1549             | PKS <sup>b</sup>                                          | <i>Nostoc</i> sp. ' <i>P. membranacea</i> cyanobiont'        | 87         | AGH69824                 |
| NPM_5846 | 1368             | NRPS <sup>f</sup>                                         | <i>Nostoc</i> sp. ' <i>P. membranacea</i> cyanobiont'        | 99         | AGH69825                 |
| NPM_5847 | 459              | cytochrome P450                                           | <i>Nostoc</i> sp. ' <i>P. membranacea</i> cyanobiont'        | 100        | AGH69826                 |
| NPM_5848 | 460              | cytochrome P450                                           | <i>Nostoc</i> sp. ' <i>P. membranacea</i> cyanobiont'        | 99         | AGH69827                 |
| NPM_5849 | 343              | sucrase ferredoxin                                        | <i>Nostoc</i> sp. ' <i>P. membranacea</i> cyanobiont'        | 99         | AGH69828                 |
| NPM_5850 | 457              | MATE family efflux transporter                            | <i>Nostoc</i> sp. ' <i>P. membranacea</i> cyanobiont'        | 99         | AGH69829                 |

<sup>a</sup> Deduced architecture of the encoded NRPS protein is AS-ACP-C-A-PCP.

<sup>b</sup> Deduced architecture of the encoded PKS protein is KS-AT-KR-ACP.

<sup>c</sup> Deduced architecture of the encoded NRPS protein is C-A-PCP-E.

<sup>d</sup> Deduced architecture of the encoded NRPS protein is C (partial)-A-PCP.

<sup>e</sup> Deduced architecture of the encoded NRPS protein is C-A-PCP.

<sup>f</sup> Deduced architecture of the encoded NRPS protein is C-A-PCP-TE.

Figure S18. Continued.

### *Nostoc* sp. N6 *nrps6*

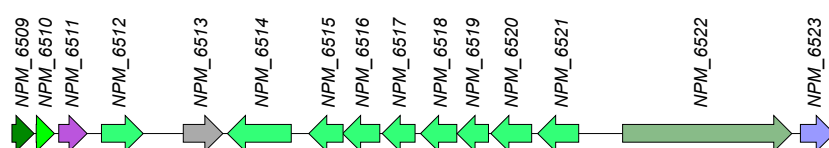

| ORF      | Protein size, aa | Proposed function                                                    | Closest homolog (origin)            | % identity | GenBank accession number |
|----------|------------------|----------------------------------------------------------------------|-------------------------------------|------------|--------------------------|
| NPM_6509 | 258              | enoyl-ACP reductase                                                  | <i>Nostoc punctiforme</i> PCC 73102 | 99         | ACC83816                 |
| NPM_6510 | 213              | imidazoleglycerol-phosphate dehydratase                              | <i>N. punctiforme</i> PCC 73102     | 97         | ACC83815                 |
| NPM_6511 | 329              | multidrug ABC transporter ATP-binding protein                        | <i>N. punctiforme</i> PCC 73102     | 96         | ACC83814                 |
| NPM_6512 | 487              | polysaccharide export protein                                        | <i>N. punctiforme</i> PCC 73102     | 93         | ACC83813                 |
| NPM_6513 | 462              | parallel beta-helix repeat-containing protein                        | <i>N. punctiforme</i> PCC 73102     | 65         | ACC83812                 |
| NPM_6514 | 743              | capsular exopolysaccharide biosynthesis protein                      | <i>N. punctiforme</i> PCC 73102     | 85         | ACC83811                 |
| NPM_6515 | 399              | glycosyltransferase WbuB                                             | <i>N. punctiforme</i> PCC 73102     | 91         | ACC83810                 |
| NPM_6516 | 433              | GDP-mannose dehydrogenase                                            | <i>N. punctiforme</i> PCC 73102     | 91         | ACC83809                 |
| NPM_6517 | 384              | glycosyltransferase                                                  | <i>N. punctiforme</i> PCC 73102     | 80         | ACC83808                 |
| NPM_6518 | 421              | O-antigen ligase                                                     | <i>Chlorogloeopsis</i> sp. PCC 7702 | 65         | WP_017320729             |
| NPM_6519 | 367              | glycosyltransferase                                                  | <i>N. punctiforme</i> PCC 73102     | 83         | ACC83806                 |
| NPM_6520 | 477              | polysaccharide biosynthesis protein                                  | <i>N. punctiforme</i> PCC 73102     | 85         | ACC83805                 |
| NPM_6521 | 480              | exopolysaccharide biosynthesis polyprenyl glycosylphosphotransferase | <i>N. punctiforme</i> PCC 73102     | 93         | ACC83804                 |
| NPM_6522 | 1972             | NRPS <sup>a</sup>                                                    | <i>Scytonema hofmanni</i> PCC 7110  | 65         | WP_017748312             |
| NPM_6523 | 393              | aldo/keto reductase                                                  | <i>Nostoc punctiforme</i> PCC 73102 | 95         | ACC83802                 |

<sup>a</sup> Deduced architecture of the encoded NRPS protein is A-PCP-C-A-PCP-TE.

**Figure S18.** *Continued.*

*Nostoc* sp. '*Lobaria pulmonaria*' *nrps1*

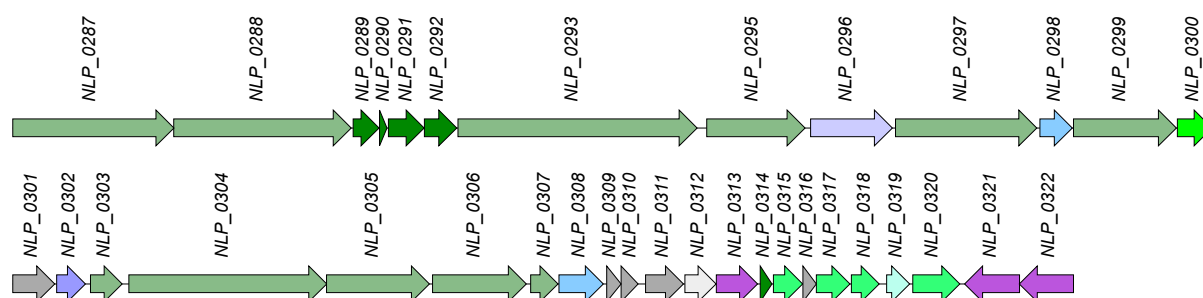

| ORF      | Protein size, aa | Proposed function                        | Closest homolog (origin)                        | % identity | GenBank accession number |
|----------|------------------|------------------------------------------|-------------------------------------------------|------------|--------------------------|
| NLP_0287 | 1776             | NRPS <sup>a</sup>                        | <i>Calothrix</i> sp. PCC 7103                   | 77         | WP_019490343             |
| NLP_0288 | 1953             | PKS <sup>b</sup>                         | <i>Scytonema hofmanni</i> PCC 7110              | 62         | WP_017744625             |
| NLP_0289 | 284              | 3-hydroxyacyl-CoA dehydrogenase          | <i>Nostoc</i> sp. PCC 7107                      | 87         | AFY44047                 |
| NLP_0290 | 82               | D-alanyl carrier protein                 | <i>Fischerella muscicola</i> PCC 7414           | 88         | WP_016862270             |
| NLP_0291 | 394              | acyl-CoA dehydrogenase                   | <i>S. hofmanni</i> UTEX 2349                    | 94         | WP_029634525             |
| NLP_0292 | 356              | FkbH-like protein                        | <i>Fischerella</i> sp. PCC 9605                 | 88         | WP_026736225             |
| NLP_0293 | 2632             | NRPS <sup>c</sup>                        | <i>Tolypothrix campylonemoides</i> VB511288     | 73         | KIJ75066                 |
| NLP_0295 | 1082             | NRPS <sup>d</sup>                        | <i>Mastigocladus laminosus</i> UU774            | 71         | WP_044449763             |
| NLP_0296 | 899              | TonB-dependent receptor                  | <i>Gloeocapsa</i> sp. PCC 7428                  | 74         | AFZ30913                 |
| NLP_0297 | 1556             | PKS <sup>e</sup>                         | <i>S. hofmanni</i> PCC 7110                     | 71         | WP_017744617             |
| NLP_0298 | 356              | luciferase-like monooxygenase            | <i>S. hofmanni</i> PCC 7110                     | 84         | WP_017744616             |
| NLP_0299 | 1134             | NRPS <sup>d</sup>                        | <i>Fischerella</i> sp. PCC 9339                 | 60         | WP_017308724             |
| NLP_0300 | 380              | capreomycin synthase                     | <i>Actinomadura oligospora</i> ATCC 43269       | 50         | WP_034482709             |
| NLP_0301 | 463              | hypothetical protein                     | <i>Serratia marcescens</i> FG194                | 26         | AGB80661                 |
| NLP_0302 | 315              | methyltransferase                        | <i>Calothrix</i> sp. PCC 7103                   | 63         | WP_019490341             |
| NLP_0303 | 347              | L-arginine $\beta$ -hydroxylase          | <i>Actinoalloteichus cyanogriseus</i> DSM 43889 | 46         | WP_035276211             |
| NLP_0304 | 2179             | NRPS <sup>f</sup>                        | <i>Fischerella</i> sp. PCC 9339                 | 66         | WP_017307804             |
| NLP_0305 | 1131             | NRPS <sup>d</sup>                        | <i>Anabaena cylindrica</i> PCC 7122             | 71         | AFZ60772                 |
| NLP_0306 | 1031             | thioester reductase                      | <i>Limnoraphis robusta</i> CS-951               | 64         | KKD39743                 |
| NLP_0307 | 301              | methyltransferase                        | <i>A. cylindrica</i> PCC 7122                   | 63         | AFZ60771                 |
| NLP_0308 | 489              | acetyl ornithine aminotransferase        | <i>Acaryochloris marina</i> MBIC11017           | 68         | ABW31361                 |
| NLP_0309 | 156              | hypothetical protein                     | <i>A. cylindrica</i> PCC 7122                   | 46         | AFZ60769                 |
| NLP_0310 | 187              | hypothetical protein                     | <i>A. cylindrica</i> PCC 7122                   | 62         | AFZ60768                 |
| NLP_0311 | 418              | tyrosinase                               | <i>Gloeocapsa</i> sp. PCC 73106                 | 63         | ELR97043                 |
| NLP_0312 | 343              | sucrase ferredoxin                       | <i>Mastigocoleus testarum</i> BC008             | 80         | KST66001                 |
| NLP_0313 | 454              | MATE family efflux transporter           | <i>S. hofmanni</i> UTEX 2349                    | 73         | WP_029634515             |
| NLP_0314 | 128              | polysaccharide biosynthesis protein GtrA | <i>Microcystis panniformis</i> FACHB-1757       | 53         | AKV67515                 |
| NLP_0315 | 323              | glycosyltransferase                      | <i>Sulfuricella denitrificans</i> skB26         | 71         | BAN36688                 |
| NLP_0316 | 147              | WxcM-like protein                        | <i>Thioploca ingrca</i>                         | 68         | BAP57500                 |
| NLP_0317 | 369              | AHBA synthase                            | <i>T. campylonemoides</i> VB511288              | 75         | KIJ74864                 |
| NLP_0318 | 306              | glucose-1-phosphate thymidyltransferase  | <i>Fischerella</i> sp. JSC-11                   | 82         | EHC10631                 |
| NLP_0319 | 253              | methyltransferase                        | <i>Sulfurimonas gotlandica</i> GD1              | 42         | EDZ62258                 |
| NLP_0320 | 517              | glycosyltransferase                      | <i>Leptolyngbya</i> sp. NIES-2104               | 52         | GAP94265                 |
| NLP_0321 | 604              | ABC transporter                          | <i>Paenibacillus</i> sp. FJAT-27812             | 48         | WP_053372800             |
| NLP_0322 | 597              | ABC transporter                          | <i>Nostoc</i> sp. PCC 7120                      | 50         | BAB74322                 |

<sup>a</sup> Deduced architecture of the encoded NRPS protein is AS-ACP-C-A-PCP.

<sup>b</sup> Deduced architecture of the encoded PKS protein is KS-AT-MeT-KR-ACP.

<sup>c</sup> Deduced architecture of the encoded NRPS protein is C-A-PCP-C-A-PCP-C-E.

<sup>d</sup> Deduced architecture of the encoded NRPS protein is C-A-PCP.

<sup>e</sup> Deduced architecture of the encoded PKS protein is KS-AT-KR-ACP.

<sup>f</sup> Deduced architecture of the encoded NRPS protein is C-A-PCP-C-A-PCP.

Figure S18. Continued.

### *Nostoc* sp. '*Lobaria pulmonaria*' *nrps2*

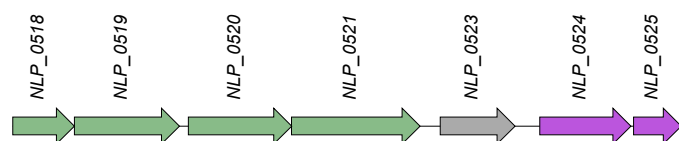

| ORF      | Protein size, aa | Proposed function             | Closest homolog (origin)                | % identity | GenBank accession number |
|----------|------------------|-------------------------------|-----------------------------------------|------------|--------------------------|
| NLP_0518 | 679              | NRPS <sup>a</sup>             | <i>Nostoc punctiforme</i> PCC 73102     | 65         | ACC81528                 |
| NLP_0519 | 1156             | PKS <sup>b</sup>              | <i>N. punctiforme</i> PCC 73102         | 90         | ACC84848                 |
| NLP_0520 | 1136             | NRPS <sup>c</sup>             | <i>N. punctiforme</i> PCC 73102         | 65         | ACC84846                 |
| NLP_0521 | 1414             | NRPS <sup>d</sup>             | <i>Microcoleus vaginatus</i> FGP-2      | 60         | EGK86184                 |
| NLP_0523 | 824              | Ig family protein             | <i>Aphanizomenon flos-aquae</i> NIES-81 | 58         | WP_035081231             |
| NLP_0524 | 1003             | peptidase C39                 | <i>N. punctiforme</i> PCC 73102         | 95         | ACC84843                 |
| NLP_0525 | 527              | HlyD family secretion protein | <i>N. punctiforme</i> PCC 73102         | 88         | ACC84842                 |

<sup>a</sup> Deduced architecture of the encoded NRPS protein is A-PCP.

<sup>b</sup> Deduced architecture of the encoded PKS protein is KS-AT-ACP.

<sup>c</sup> Deduced architecture of the encoded NRPS protein is C-A-PCP.

<sup>d</sup> Deduced architecture of the encoded NRPS protein is C-A-PCP-TE.

### *Nostoc* sp. '*Lobaria pulmonaria*' *hgl*

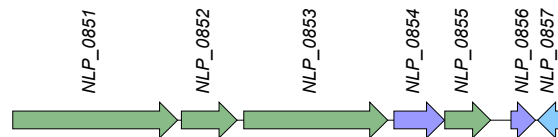

| ORF      | Protein size, aa | Proposed function                                                       | Closest homolog (origin)                                     | % identity | GenBank accession number |
|----------|------------------|-------------------------------------------------------------------------|--------------------------------------------------------------|------------|--------------------------|
| NLP_0851 | 1816             | heterocyst glycolipid synthase HgIE <sup>a</sup>                        | <i>Nostoc punctiforme</i> PCC 73102                          | 94         | ACC78845                 |
| NLP_0852 | 572              | heterocyst glycolipid ketoreductase HgIG                                | <i>Nostoc</i> sp. ' <i>Peltigera membranacea</i> cyanobiont' | 96         | AGJ76602                 |
| NLP_0853 | 1582             | heterocyst glycolipid synthase HgIC <sup>b</sup>                        | <i>Nostoc</i> sp. ' <i>P. membranacea</i> cyanobiont'        | 94         | AGJ76603                 |
| NLP_0854 | 558              | heterocyst glycolipid enoyl reductase PfaD (2-nitropropane dioxygenase) | <i>Nostoc</i> sp. ' <i>P. membranacea</i> cyanobiont'        | 98         | AGJ76604                 |
| NLP_0855 | 504              | heterocyst glycolipid synthase HgIB <sup>c</sup>                        | <i>Nostoc</i> sp. ' <i>P. membranacea</i> cyanobiont'        | 97         | AGJ76605                 |
| NLP_0856 | 267              | short-chain dehydrogenase/reductase                                     | <i>Nostoc</i> sp. ' <i>P. membranacea</i> cyanobiont'        | 95         | AGJ76606                 |
| NLP_0857 | 239              | 4'-phosphopantetheinyl transferase HetI                                 | <i>N. punctiforme</i> PCC 73102                              | 87         | ACC78839                 |

<sup>a</sup> Deduced architecture of the encoded protein is KS-MAT-ACP-ACP-KR.

<sup>b</sup> Deduced architecture of the encoded protein is KS-CLF-AT.

<sup>c</sup> Deduced architecture of the encoded protein is ACP-TE.

Figure S18. Continued.

### *Nostoc* sp. '*Lobaria pulmonaria*' nrps3

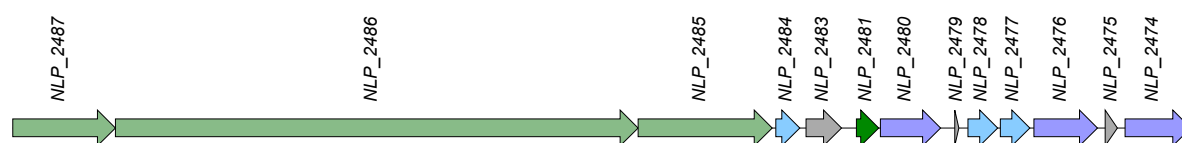

| ORF      | Protein size, aa | Proposed function                                | Closest homolog (origin)              | % identity | GenBank accession number |
|----------|------------------|--------------------------------------------------|---------------------------------------|------------|--------------------------|
| NLP_2474 | 724              | ABC transporter                                  | <i>Nostoc punctiforme</i> PCC 73102   | 88         | ACC80794                 |
| NLP_2475 | 134              | hypothetical protein                             | <i>N. punctiforme</i> PCC 73102       | 96         | ACC80793                 |
| NLP_2476 | 698              | patatin                                          | <i>N. punctiforme</i> PCC 73102       | 93         | ACC80792                 |
| NLP_2477 | 325              | MvdD family ATP-grasp ribosomal peptide maturase | <i>N. punctiforme</i> PCC 73102       | 95         | ACC80791                 |
| NLP_2478 | 329              | MvdD family ATP-grasp ribosomal peptide maturase | <i>N. punctiforme</i> PCC 73102       | 92         | ACC80790                 |
| NLP_2479 | 44               | microviridin precursor                           | <i>N. piscinale</i> CENA21            | 60         | ALF56610                 |
| NLP_2480 | 663              | ABC transporter                                  | <i>N. punctiforme</i> PCC 73102       | 82         | ACC80789                 |
| NLP_2481 | 245              | short-chain dehydrogenase/reductase              | <i>Scytonema hofmanni</i> PCC 7110    |            | WP_017742660             |
| NLP_2483 | 389              | McnG protein                                     | <i>S. hofmanni</i> PCC 7110           | 81         | WP_017742645             |
| NLP_2484 | 264              | methyltransferase                                | <i>S. hofmanni</i> PCC 7110           | 75         | WP_017742659             |
| NLP_2485 | 1477             | NRPS <sup>a</sup>                                | <i>S. hofmanni</i> PCC 7110           | 77         | WP_017742649             |
| NLP_2486 | 5755             | NRPS <sup>b</sup>                                | <i>S. hofmanni</i> PCC 7110           | 74         | WP_017742656             |
| NLP_2487 | 1132             | NRPS <sup>c</sup>                                | <i>Microcystis</i> sp. NIVA-CYA 172/5 | 69         | AAZ03550                 |

<sup>a</sup> Deduced architecture of the encoded NRPS protein is C–A–PCP–TE.

<sup>b</sup> Deduced architecture of the encoded NRPS protein is C–A–PCP–C–A–PCP–C–A–PCP–C–A–PCP–C–A–MeT–PCP.

<sup>c</sup> Deduced architecture of the encoded NRPS protein is C–A–PCP.

### *Nostoc* sp. '*Lobaria pulmonaria*' nrps4

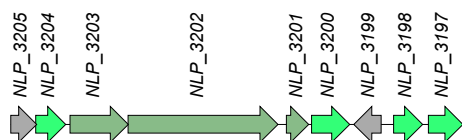

| ORF      | Protein size, aa | Proposed function                   | Closest homolog (origin)                         | % identity | GenBank accession number |
|----------|------------------|-------------------------------------|--------------------------------------------------|------------|--------------------------|
| NLP_3197 | 380              | ADP-heptose:LPS heptosyltransferase | <i>Nostoc</i> sp. PCC 7107                       | 68         | AFY42227                 |
| NLP_3198 | 320              | ADP-heptose:LPS heptosyltransferase | <i>Sulfurospirillum arsenophilum</i> NBRC 109478 | 50         | WP_041959142             |
| NLP_3199 | 302              | hypothetical protein                | <i>Pedobacter</i> sp. Leaf216                    | 38         | KQM63951                 |
| NLP_3200 | 418              | glycosyltransferase                 | <i>Mastigocladopsis repens</i> PCC 10914         | 61         | WP_017314697             |
| NLP_3201 | 245              | methyltransferase                   | <i>Synechocystis</i> sp. PCC 7509                | 53         | WP_009632864             |
| NLP_3202 | 1649             | NRPS <sup>a</sup>                   | <i>Scytonema tolypothrichoides</i> VB-61278      | 45         | WP_052486119             |
| NLP_3203 | 642              | NRPS <sup>b</sup>                   | <i>S. tolypothrichoides</i> VB-61278             | 69         | WP_052486118             |
| NLP_3204 | 328              | aspartate racemase                  | <i>Sc. hofmanni</i> PCC 7110                     | 58         | WP_017748823             |
| NLP_3205 | 286              | hypothetical protein                | <i>Tolypothrix bouteillei</i> VB521301           | 84         | KIE11607                 |

<sup>a</sup> Deduced architecture of the encoded NRPS protein is C–A–PCP–C.

<sup>b</sup> Deduced architecture of the encoded NRPS protein is A–PCP.

Figure S18. Continued.

### *Nostoc* sp. '*Lobaria pulmonaria*' nrps5

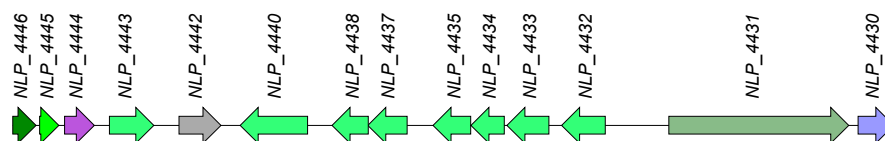

| ORF      | Protein size, aa | Proposed function                                                    | Closest homolog (origin)            | % identity | GenBank accession number |
|----------|------------------|----------------------------------------------------------------------|-------------------------------------|------------|--------------------------|
| NLP_4430 | 393              | aldo/keto reductase                                                  | <i>Nostoc punctiforme</i> PCC 73102 | 91         | ACC83802                 |
| NLP_4431 | 1983             | NRPS <sup>a</sup>                                                    | <i>Scytonema hofmanni</i> PCC 7110  | 59         | WP_017748312             |
| NLP_4432 | 480              | exopolysaccharide biosynthesis polyprenyl glycosylphosphotransferase | <i>N. punctiforme</i> PCC 73102     | 90         | ACC83804                 |
| NLP_4433 | 462              | polysaccharide biosynthesis protein                                  | <i>N. punctiforme</i> PCC 73102     | 83         | ACC83805                 |
| NLP_4434 | 367              | glycosyltransferase                                                  | <i>N. punctiforme</i> PCC 73102     | 86         | ACC83806                 |
| NLP_4435 | 414              | O-antigen ligase                                                     | <i>Chlorogloeopsis</i> sp. PCC 7702 | 62         | WP_017320729             |
| NLP_4437 | 433              | GDP-mannose dehydrogenase                                            | <i>N. punctiforme</i> PCC 73102     | 90         | ACC83809                 |
| NLP_4438 | 398              | glycosyltransferase WbuB                                             | <i>N. punctiforme</i> PCC 73102     | 93         | ACC83810                 |
| NLP_4440 | 742              | capsular exopolysaccharide biosynthesis protein                      | <i>N. punctiforme</i> PCC 73102     | 84         | ACC83811                 |
| NLP_4442 | 462              | parallel beta-helix repeat-containing protein                        | <i>N. punctiforme</i> PCC 73102     | 62         | ACC83812                 |
| NLP_4443 | 489              | polysaccharide export protein                                        | <i>N. punctiforme</i> PCC 73102     | 92         | ACC83813                 |
| NLP_4444 | 327              | multidrug ABC transporter                                            | <i>N. punctiforme</i> PCC 73102     | 94         | ACC83814                 |
| NLP_4445 | 211              | ATP-binding protein                                                  | <i>N. punctiforme</i> PCC 73102     | 96         | ACC83815                 |
| NLP_4446 | 258              | imidazoleglycerol-phosphate dehydratase                              | <i>N. punctiforme</i> PCC 73102     | 96         | ACC83816                 |
|          |                  | enoyl-ACP reductase                                                  | <i>N. punctiforme</i> PCC 73102     | 96         | ACC83816                 |

<sup>a</sup> Deduced architecture of the encoded NRPS protein is A-PCP-C-A-PCP-TE.

### *Nostoc* sp. '*Lobaria pulmonaria*' nrps6

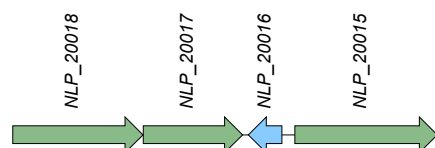

| ORF       | Protein size, aa | Proposed function        | Closest homolog (origin)           | % identity | GenBank accession number |
|-----------|------------------|--------------------------|------------------------------------|------------|--------------------------|
| NLP_20015 | 1569             | NRPS <sup>a</sup>        | <i>Scytonema hofmanni</i> PCC 7110 | 90         | WP_051077115             |
| NLP_20016 | 369              | $\alpha/\beta$ hydrolase | <i>S. hofmanni</i> UTEX 2349       | 93         | WP_029631593             |
| NLP_20017 | 1091             | NRPS <sup>b</sup>        | <i>S. hofmanni</i> PCC 7110        | 91         | WP_017747558             |
| NLP_20018 | 1436             | NRPS <sup>c</sup>        | <i>S. hofmanni</i> PCC 7110        | 86         | WP_017747559             |

<sup>a</sup> Deduced architecture of the encoded NRPS protein is C-A-MeT-PCP.

<sup>b</sup> Deduced architecture of the encoded NRPS protein is C-A-PCP.

<sup>c</sup> Deduced architecture of the encoded NRPS protein is C-A-PCP-TE.

**Figure S18.** *Continued.*

*Nostoc* sp. 'Lobaria pulmonaria' nrps7

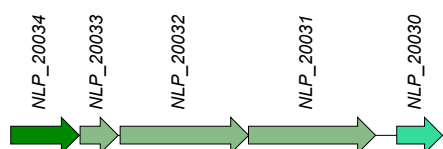

| ORF       | Protein size, aa | Proposed function                            | Closest homolog (origin)                 | % identity | GenBank accession number |
|-----------|------------------|----------------------------------------------|------------------------------------------|------------|--------------------------|
| NLP_20030 | 503              | EmrB/QacA family drug resistance transporter | <i>Mastigocladopsis repens</i> PCC 10914 | 64         | WP_017317776             |
| NLP_20031 | 1399             | NRPS <sup>a</sup>                            | <i>Scytonema hofmanni</i> PCC 7110       | 67         | WP_017745372             |
| NLP_20032 | 1414             | PKS <sup>b</sup>                             | <i>Fischerella</i> sp. PCC 9339          | 48         | WP_017308083             |
| NLP_20033 | 418              | cytochrome P450                              | <i>Scytonema hofmanni</i> PCC 7110       | 58         | WP_017745373             |
| NLP_20034 | 756              | AMP-dependent synthetase/ligase              | <i>Scytonema hofmanni</i> PCC 7110       | 60         | WP_017745374             |

<sup>a</sup> Deduced architecture of the encoded NRPS protein is C–A–PCP–TE.

<sup>b</sup> Deduced architecture of the encoded PKS protein is KS–AT–MeT–ACP.

**Figure S18.** *Continued.*



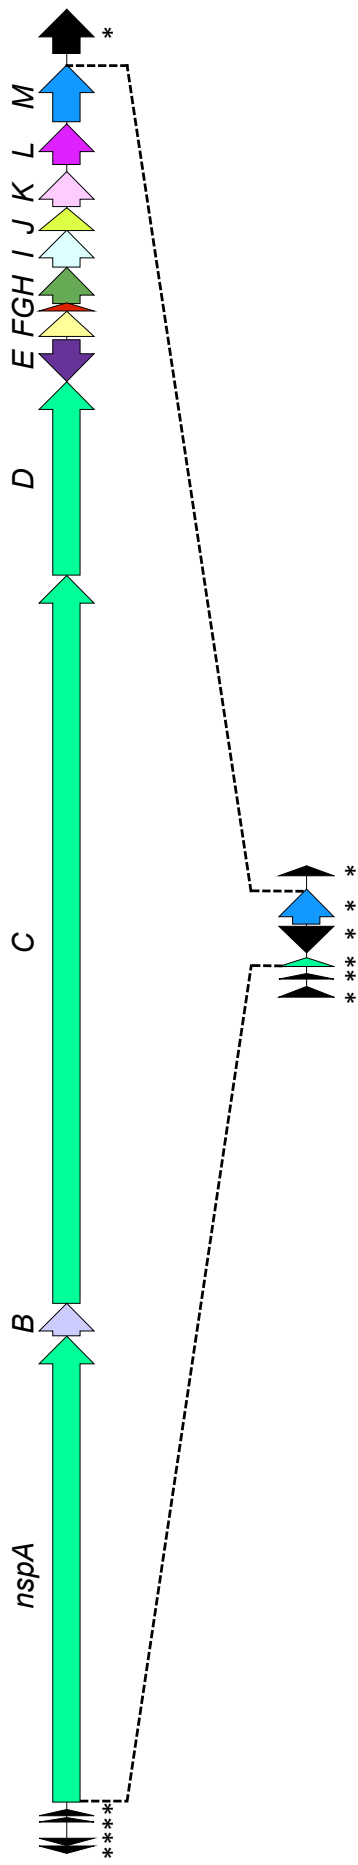

**Figure S19.** Nosperin gene cluster (*nsp*) in *Nostoc* sp. N6 (top) and its remnants in the *L. pulmonaria* cyanobiont (bottom). The genes are color coded as in (Kampa et al., 2013). Pseudogenes are denoted with an asterisk (\*), black arrows represent transposase genes.

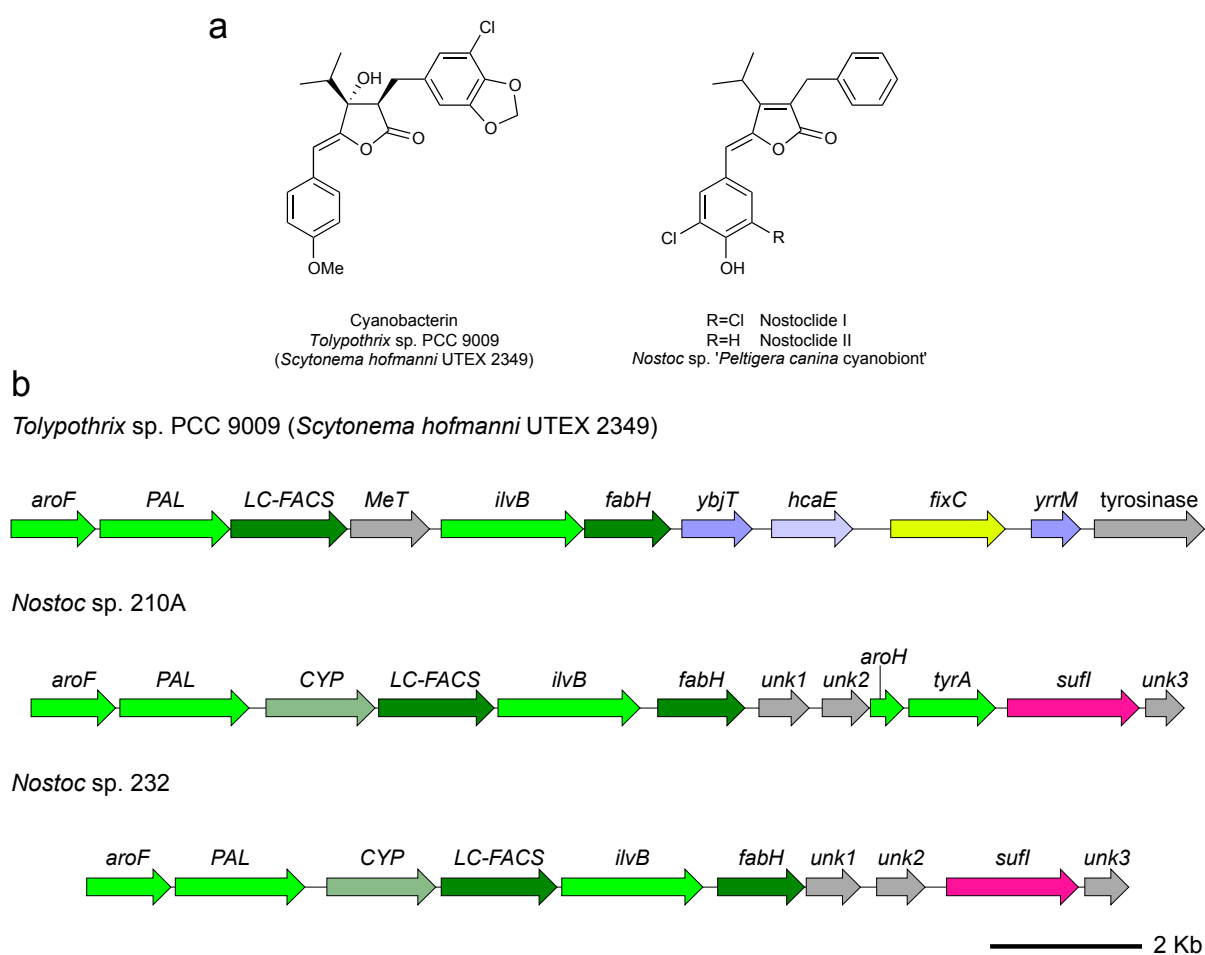

**Figure S20.** Structures (a) and putative biosynthetic gene clusters of cyanobacterin and nostoclides (b). *aroF*, 3-deoxy-7-phosphoheptulonate synthase; *PAL*, aromatic amino acid lyase; *CYP*, cytochrome P450; *LC-FACS*, long-chain-fatty-acid-CoA ligase; *MeT*, putative *O*-methyltransferase; *ilvB*, acetolactate synthase; *fabH*, 3-oxoacyl-ACP synthase; *ybjT*, NAD(P)-dependent oxidoreductase; *hcaE*, phenylpropionate dioxygenase or related ring-hydroxylating dioxygenase; *fixC*, putative halogenase; *yrrM*, predicted *O*-methyltransferase; *aroH*, chorismate mutase; *tyrA*, bifunctional chorismate mutase/prephenate dehydrogenase; *sufl*, multicopper oxidase; *unk*, unknown.

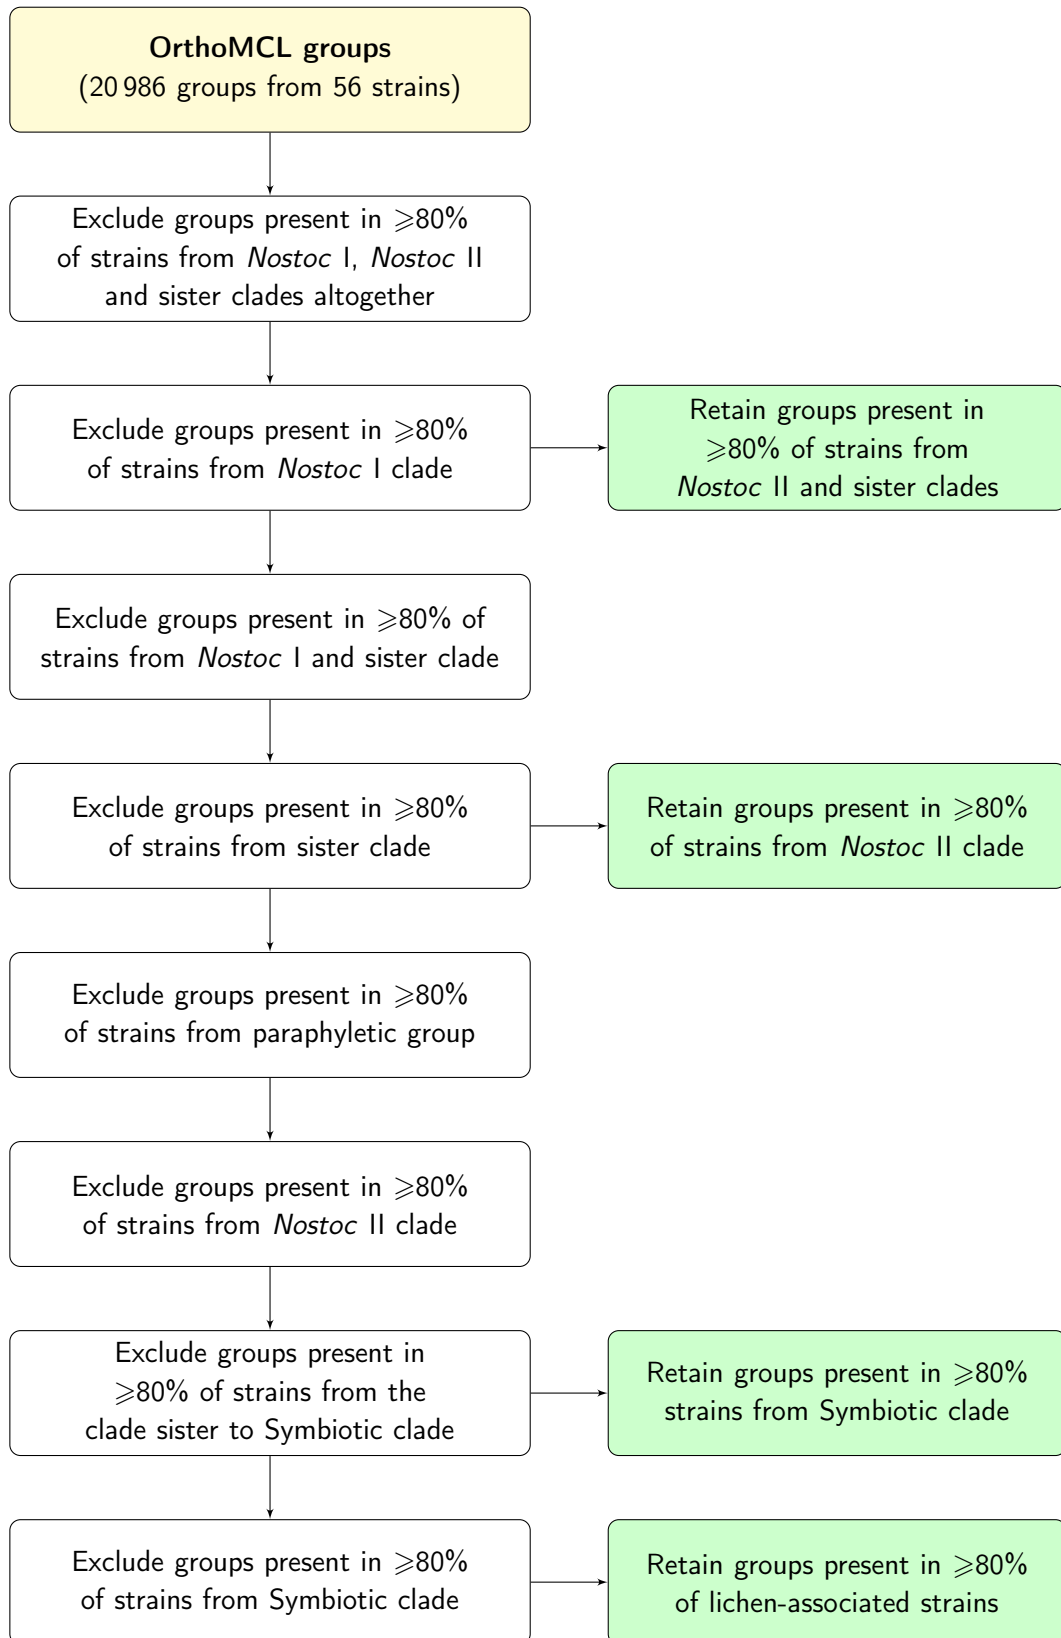

**Figure S21.** Workflow for extracting orthologous groups specific to different clades. The clades and groups are shown in Figure 4 where “paraphyletic group” corresponds to strains highlighted with blue, “symbiotic” – to strains highlighted with green and lichen-associated strains are shown in bold.

**Table S1.** Assemblies of *Nostoc* genomes

| Strain                                  | BioProject  | BioSample    | Accession     | Sequencing library                                | Number of scaffolds | Assembly size | Mean coverage |
|-----------------------------------------|-------------|--------------|---------------|---------------------------------------------------|---------------------|---------------|---------------|
| <i>Nostoc</i> sp. N6                    | PRJNA279350 | SAMN03445855 | –             | Illumina NexteraXT and Illumina Nextera Mate pair | –                   | 8.9 Mb        | 413×          |
| <i>Nostoc</i> sp. N6                    | PRJNA275880 | SAMN03354403 | –             | Illumina NexteraXT and Illumina Nextera Mate pair | –                   | 7.34 Mb       | 37×           |
| <i>Nostoc</i> sp. 210A                  | PRJNA389199 | SAMN07191894 | NOLJ000000000 | Illumina NexteraXT and Illumina Nextera Mate pair | 30                  | 8.33 Mb       | 90×           |
| <i>Nostoc</i> sp. 213                   | PRJNA389200 | SAMN07191895 | NOLI000000000 | Illumina NexteraXT                                | 378                 | 8.33 Mb       | 25×           |
| <i>Nostoc</i> sp. 232                   | PRJNA389202 | SAMN07191897 | NOLK000000000 | Illumina NexteraXT                                | 397                 | 9.16 Mb       | 35×           |
| <i>Nostoc</i> sp. ' <i>P. malacea</i> ' | PRJNA389205 | SAMN07192327 | NSHF000000000 | Roche 454 and Illumina Mate pair v2               | 985                 | 8.52 Mb       | 13×           |

**Table S2.** Completeness and contamination of *Nostoc* genome assemblies assessed with CheckM (Parks et al., 2015)

| Strain                                     | Marker lineage <sup>a</sup> | Number of genomes <sup>b</sup> | Number of markers <sup>c</sup> | Number of marker sets <sup>d</sup> | Completeness | Contamination | Strain heterogeneity |
|--------------------------------------------|-----------------------------|--------------------------------|--------------------------------|------------------------------------|--------------|---------------|----------------------|
| <i>Nostoc</i> sp. N6                       | Cyanobacteria               | 82                             | 579                            | 450                                | 99.44        | 1.19          | 0.00                 |
| <i>Nostoc</i> sp. ' <i>L. pulmonaria</i> ' | Cyanobacteria               | 82                             | 579                            | 450                                | 99.55        | 0.44          | 0.00                 |
| <i>Nostoc</i> sp. 210A                     | Cyanobacteria               | 82                             | 579                            | 450                                | 99.22        | 1.33          | 0.00                 |
| <i>Nostoc</i> sp. 213                      | Cyanobacteria               | 82                             | 579                            | 450                                | 99.00        | 0.74          | 0.00                 |
| <i>Nostoc</i> sp. 232                      | Cyanobacteria               | 82                             | 579                            | 450                                | 98.78        | 1.37          | 11.11                |
| <i>Nostoc</i> sp. ' <i>P. malacea</i> '    | Cyanobacteria               | 82                             | 579                            | 450                                | 94.54        | 4.60          | 44.44                |

<sup>a</sup> Lineage used for inferring marker set

<sup>b</sup> Number of reference genomes used to infer marker set

<sup>c</sup> Number of inferred marker genes

<sup>d</sup> Number of inferred co-located marker sets

**Table S3.** COG category assignment of the proteins encoded in the genome of *Mostoc* sp. N6.

| COG functional category                                         | chr  | pNPM1 | pNPM2 | pNPM3 | pNPM4 | pNPM5 | pNPM6 | pNPM7 | pNPM8 | pNPM9 | pNPM10 | Total |
|-----------------------------------------------------------------|------|-------|-------|-------|-------|-------|-------|-------|-------|-------|--------|-------|
| J Translation, ribosomal structure and biogenesis               | 246  | 1     | 2     | 0     | 2     | 0     | 0     | 0     | 0     | 0     | 0      | 251   |
| A RNA processing and modification                               | 1    | 0     | 0     | 0     | 0     | 0     | 0     | 0     | 0     | 0     | 0      | 1     |
| K Transcription                                                 | 154  | 8     | 3     | 0     | 0     | 0     | 1     | 0     | 2     | 0     | 0      | 168   |
| L Replication, recombination and repair                         | 174  | 7     | 11    | 4     | 2     | 1     | 3     | 2     | 5     | 1     | 1      | 211   |
| B Chromatin structure and dynamics                              | 2    | 0     | 0     | 0     | 0     | 0     | 0     | 0     | 0     | 0     | 0      | 2     |
| D Cell cycle control, cell division, chromosome partitioning    | 57   | 2     | 1     | 2     | 1     | 1     | 0     | 2     | 2     | 2     | 0      | 70    |
| Y Nuclear structure                                             | 0    | 0     | 0     | 0     | 0     | 0     | 0     | 0     | 0     | 0     | 0      | 0     |
| V Defense mechanisms                                            | 166  | 8     | 1     | 0     | 2     | 0     | 0     | 0     | 2     | 0     | 0      | 179   |
| T Signal transduction mechanisms                                | 336  | 6     | 3     | 2     | 2     | 2     | 2     | 0     | 0     | 0     | 0      | 353   |
| M Cell wall/membrane/envelope biogenesis                        | 306  | 3     | 2     | 0     | 0     | 2     | 0     | 0     | 0     | 0     | 0      | 313   |
| N Cell motility                                                 | 53   | 0     | 0     | 0     | 0     | 0     | 0     | 0     | 0     | 0     | 0      | 53    |
| Z Cytoskeleton                                                  | 0    | 0     | 0     | 0     | 0     | 0     | 0     | 0     | 0     | 0     | 0      | 0     |
| W Extracellular structures                                      | 0    | 0     | 0     | 0     | 0     | 0     | 0     | 0     | 0     | 0     | 0      | 0     |
| U Intracellular trafficking, secretion, and vesicular transport | 51   | 3     | 1     | 0     | 0     | 0     | 0     | 0     | 0     | 0     | 0      | 55    |
| O Posttranslational modification, protein turnover, chaperones  | 212  | 2     | 1     | 0     | 0     | 0     | 0     | 0     | 1     | 0     | 0      | 216   |
| C Energy production and conversion                              | 208  | 0     | 1     | 0     | 0     | 0     | 0     | 0     | 0     | 0     | 0      | 209   |
| G Carbohydrate transport and metabolism                         | 192  | 0     | 0     | 0     | 0     | 0     | 0     | 0     | 2     | 0     | 0      | 194   |
| E Amino acid transport and metabolism                           | 240  | 1     | 0     | 0     | 0     | 0     | 0     | 0     | 0     | 0     | 1      | 242   |
| F Nucleotide transport and metabolism                           | 72   | 0     | 1     | 0     | 0     | 0     | 0     | 0     | 1     | 0     | 0      | 74    |
| H Coenzyme transport and metabolism                             | 257  | 2     | 2     | 0     | 0     | 0     | 0     | 0     | 0     | 0     | 0      | 261   |
| I Lipid transport and metabolism                                | 127  | 1     | 2     | 0     | 0     | 0     | 0     | 0     | 0     | 0     | 0      | 130   |
| P Inorganic ion transport and metabolism                        | 233  | 4     | 1     | 0     | 0     | 0     | 0     | 0     | 0     | 0     | 0      | 238   |
| Q Secondary metabolites biosynthesis, transport and catabolism  | 132  | 1     | 0     | 0     | 0     | 0     | 0     | 0     | 1     | 0     | 0      | 134   |
| X Mobilome: prophages, transposons                              | 84   | 7     | 1     | 0     | 0     | 0     | 1     | 0     | 2     | 2     | 0      | 97    |
| R General function prediction only                              | 517  | 9     | 6     | 0     | 1     | 2     | 0     | 3     | 3     | 0     | 0      | 541   |
| S Function unknown                                              | 294  | 5     | 1     | 2     | 2     | 2     | 1     | 3     | 1     | 0     | 2      | 313   |
| Assigned to COGs                                                | 4115 | 70    | 40    | 10    | 12    | 10    | 8     | 10    | 22    | 5     | 4      | 4306  |
| Not assigned to COGs                                            | 2090 | 110   | 82    | 20    | 26    | 22    | 19    | 20    | 47    | 9     | 16     | 2461  |

**Table S4.** COG category assignment of the proteins encoded in the genome of *Nostoc* sp. 'Lobaria pulmonaria cyanobiont'.

| COG functional category                                         | chr  | pNLP1 | pNLP2 | pNLP3 | pNLP4 | Total |
|-----------------------------------------------------------------|------|-------|-------|-------|-------|-------|
| J Translation, ribosomal structure and biogenesis               | 234  | 1     | 0     | 1     | 0     | 235   |
| A RNA processing and modification                               | 1    | 0     | 0     | 0     | 0     | 1     |
| K Transcription                                                 | 118  | 3     | 2     | 1     | 1     | 126   |
| L Replication, recombination and repair                         | 127  | 4     | 2     | 4     | 2     | 139   |
| B Chromatin structure and dynamics                              | 2    | 0     | 0     | 0     | 0     | 2     |
| D Cell cycle control, cell division, chromosome partitioning    | 52   | 2     | 1     | 1     | 1     | 57    |
| Y Nuclear structure                                             | 0    | 0     | 0     | 0     | 0     | 0     |
| V Defense mechanisms                                            | 134  | 0     | 0     | 3     | 3     | 140   |
| T Signal transduction mechanisms                                | 314  | 3     | 0     | 0     | 0     | 317   |
| M Cell wall/membrane/envelope biogenesis                        | 275  | 1     | 0     | 0     | 0     | 276   |
| N Cell motility                                                 | 45   | 0     | 0     | 0     | 0     | 45    |
| Z Cytoskeleton                                                  | 0    | 0     | 0     | 0     | 0     | 0     |
| W Extracellular structures                                      | 0    | 0     | 0     | 0     | 0     | 0     |
| U Intracellular trafficking, secretion, and vesicular transport | 40   | 3     | 0     | 1     | 0     | 44    |
| O Posttranslational modification, protein turnover, chaperones  | 188  | 0     | 0     | 1     | 0     | 189   |
| C Energy production and conversion                              | 208  | 0     | 0     | 0     | 0     | 208   |
| G Carbohydrate transport and metabolism                         | 189  | 0     | 1     | 0     | 0     | 190   |
| E Amino acid transport and metabolism                           | 231  | 1     | 0     | 1     | 1     | 234   |
| F Nucleotide transport and metabolism                           | 69   | 0     | 0     | 1     | 0     | 70    |
| H Coenzyme transport and metabolism                             | 245  | 2     | 1     | 0     | 0     | 248   |
| I Lipid transport and metabolism                                | 114  | 0     | 1     | 0     | 0     | 115   |
| P Inorganic ion transport and metabolism                        | 206  | 0     | 0     | 0     | 1     | 207   |
| Q Secondary metabolites biosynthesis, transport and catabolism  | 103  | 1     | 6     | 0     | 0     | 110   |
| X Mobilome: prophages, transposons                              | 33   | 3     | 2     | 0     | 0     | 38    |
| R General function prediction only                              | 464  | 1     | 1     | 4     | 1     | 471   |
| S Function unknown                                              | 288  | 2     | 0     | 1     | 0     | 291   |
| Assigned to COGs                                                | 3681 | 27    | 16    | 19    | 10    | 3753  |
| Not assigned to COGs                                            | 1630 | 55    | 20    | 41    | 23    | 1769  |

**Table S5.** COG category assignment of the proteins encoded in the genomes of *Nostoc* and *Anabaena* strains

| COG functional category                                         | <i>Nostoc</i> sp. N6 | <i>Nostoc</i> sp. 'L-pulmonaria' | <i>Nostoc punctiforme</i> | <i>Nostoc</i> sp. PCC 7107 | <i>Nostoc</i> sp. PCC 7120 | <i>Nostoc</i> sp. PCC 7524 | <i>Anabaena variabilis</i> | <i>Anabaena</i> sp. PCC 7108 | <i>Anabaena</i> sp. 90 | <i>Anabaena cylindrica</i> |
|-----------------------------------------------------------------|----------------------|----------------------------------|---------------------------|----------------------------|----------------------------|----------------------------|----------------------------|------------------------------|------------------------|----------------------------|
| J Translation, ribosomal structure and biogenesis               | 251                  | 235                              | 235                       | 221                        | 235                        | 224                        | 228                        | 210                          | 208                    | 228                        |
| A RNA processing and modification                               | 1                    | 1                                | 1                         | 0                          | 1                          | 1                          | 1                          | 0                            | 0                      | 0                          |
| K Transcription                                                 | 168                  | 126                              | 150                       | 114                        | 154                        | 132                        | 135                        | 120                          | 77                     | 135                        |
| L Replication, recombination and repair                         | 211                  | 139                              | 163                       | 125                        | 153                        | 138                        | 152                        | 158                          | 140                    | 180                        |
| B Chromatin structure and dynamics                              | 2                    | 2                                | 2                         | 2                          | 2                          | 2                          | 2                          | 2                            | 1                      | 3                          |
| D Cell cycle control, cell division, chromosome partitioning    | 70                   | 57                               | 75                        | 56                         | 64                         | 53                         | 59                         | 60                           | 45                     | 62                         |
| Y Nuclear structure                                             | 0                    | 0                                | 0                         | 0                          | 0                          | 0                          | 0                          | 0                            | 0                      | 0                          |
| V Defense mechanisms                                            | 179                  | 140                              | 170                       | 140                        | 187                        | 157                        | 135                        | 152                          | 151                    | 201                        |
| T Signal transduction mechanisms                                | 353                  | 317                              | 415                       | 325                        | 362                        | 301                        | 342                        | 258                          | 164                    | 320                        |
| M Cell wall/membrane/envelope biogenesis                        | 313                  | 276                              | 325                       | 276                        | 312                        | 273                        | 292                        | 263                          | 236                    | 262                        |
| N Cell motility                                                 | 53                   | 45                               | 52                        | 48                         | 35                         | 45                         | 37                         | 43                           | 33                     | 35                         |
| Z Cytoskeleton                                                  | 0                    | 0                                | 0                         | 0                          | 0                          | 0                          | 0                          | 0                            | 0                      | 0                          |
| W Extracellular structures                                      | 0                    | 0                                | 0                         | 1                          | 1                          | 1                          | 1                          | 0                            | 0                      | 0                          |
| U Intracellular trafficking, secretion, and vesicular transport | 55                   | 44                               | 48                        | 52                         | 64                         | 38                         | 50                         | 32                           | 28                     | 66                         |
| O Posttranslational modification, protein turnover, chaperones  | 216                  | 189                              | 228                       | 190                        | 206                        | 200                        | 216                        | 181                          | 175                    | 196                        |
| C Energy production and conversion                              | 209                  | 208                              | 218                       | 181                        | 184                        | 195                        | 209                        | 182                          | 144                    | 176                        |
| G Carbohydrate transport and metabolism                         | 194                  | 190                              | 208                       | 151                        | 168                        | 152                        | 165                        | 144                          | 111                    | 160                        |
| E Amino acid transport and metabolism                           | 242                  | 234                              | 249                       | 201                        | 224                        | 206                        | 238                        | 187                          | 180                    | 190                        |
| F Nucleotide transport and metabolism                           | 74                   | 70                               | 76                        | 73                         | 73                         | 76                         | 77                         | 67                           | 67                     | 71                         |
| H Coenzyme transport and metabolism                             | 261                  | 248                              | 256                       | 208                        | 233                        | 230                        | 239                        | 206                          | 190                    | 224                        |
| I Lipid transport and metabolism                                | 130                  | 115                              | 150                       | 81                         | 93                         | 83                         | 105                        | 91                           | 68                     | 83                         |
| P Inorganic ion transport and metabolism                        | 238                  | 207                              | 239                       | 220                        | 283                        | 256                        | 278                        | 179                          | 141                    | 209                        |
| Q Secondary metabolites biosynthesis, transport and catabolism  | 134                  | 110                              | 170                       | 77                         | 98                         | 85                         | 110                        | 74                           | 72                     | 92                         |
| X Mobilome: prophages, transposons                              | 97                   | 38                               | 71                        | 57                         | 140                        | 85                         | 99                         | 74                           | 70                     | 82                         |
| R General function prediction only                              | 541                  | 471                              | 546                       | 455                        | 457                        | 457                        | 444                        | 438                          | 405                    | 485                        |
| S Function unknown                                              | 313                  | 291                              | 335                       | 272                        | 305                        | 255                        | 280                        | 226                          | 194                    | 300                        |
| Assigned to COGs                                                | 4306                 | 3753                             | 4382                      | 3526                       | 4034                       | 3645                       | 3894                       | 3347                         | 2900                   | 3760                       |
| Not assigned to COGs                                            | 2461                 | 1769                             | 2307                      | 1711                       | 2095                       | 1804                       | 1816                       | 1822                         | 1611                   | 2078                       |
| Total                                                           | 6767                 | 5522                             | 6689                      | 5237                       | 6129                       | 5449                       | 5710                       | 5169                         | 4511                   | 5838                       |



**Table S6.** Scytonemin biosynthesis genes of *Nostoc punctiforme* and their presence in lichen-associated *Nostoc* strains. Pseudogenes are denoted with an asterisk (\*).

| Locus tag  | Gene symbol | Encoded protein                                         | <i>Nostoc</i> sp. N6 | <i>Nostoc</i> sp. ' <i>L. pulmonaria</i> ' | <i>Nostoc</i> sp. 210A | <i>Nostoc</i> sp. 213 | <i>Nostoc</i> sp. 232 | <i>Nostoc</i> sp. ' <i>P. malacea</i> ' |
|------------|-------------|---------------------------------------------------------|----------------------|--------------------------------------------|------------------------|-----------------------|-----------------------|-----------------------------------------|
| Npun_R1259 | —           | protein of unknown function                             | NPM_3284             | NLP_2898                                   | +                      | +                     | +                     | +                                       |
| Npun_R1260 | <i>aroG</i> | 3-deoxy-7-phosphoheptulonate synthase                   | NPM_3285             | NLP_1938                                   | +                      | +                     | +                     | +                                       |
| Npun_R1261 | <i>trpD</i> | anthranilate phosphoribosyltransferase                  | NPM_3286             | NLP_1937                                   | +                      | +                     | +                     | +                                       |
| Npun_R1262 | <i>trpB</i> | tryptophan synthase subunit beta                        | NPM_3287             | NLP_1936                                   | +                      | +                     | +                     | +                                       |
| Npun_R1263 | <i>tyrP</i> | tyrosinase                                              | —                    | NLP_1935                                   | +                      | —                     | —                     | +                                       |
| Npun_R1264 | <i>trpA</i> | tryptophan synthase subunit alpha                       | NPM_3288             | NLP_1934                                   | +                      | +                     | +                     | +                                       |
| Npun_R1265 | <i>trpC</i> | indole-3-glycerol phosphate synthase                    | NPM_3289             | NLP_1932                                   | +                      | +                     | +                     | +                                       |
| Npun_R1266 | <i>trpE</i> | anthranilate synthase component I                       | NPM_3290             | NLP_1931                                   | +                      | +                     | +                     | +                                       |
| Npun_R1267 | <i>aroB</i> | 3-dehydroquinate synthase                               | NPM_3291             | NLP_1930                                   | +                      | +                     | +                     | +                                       |
| Npun_R1268 | <i>frmE</i> | DSBA oxidoreductase/FrmE protein                        | NPM_3292*            | NLP_1929                                   | +                      | +                     | +                     | +                                       |
| Npun_R1269 | <i>tyrA</i> | bifunctional chorismate mutase/prephenate dehydrogenase | NPM_3293             | NLP_1928                                   | +                      | +                     | +                     | +                                       |
| Npun_R1270 | —           | group 1 glycosyltransferase                             | NPM_3294             | NLP_1927                                   | +                      | +                     | +                     | +                                       |
| Npun_R1271 | <i>scyF</i> | NHL repeat-containing protein                           | NPM_3295             | NLP_1926                                   | +                      | +                     | +                     | +                                       |
| Npun_R1272 | <i>scyE</i> | NHL repeat-containing protein                           | NPM_3296             | NLP_1925                                   | +                      | +                     | +                     | +                                       |
| Npun_R1273 | <i>scyD</i> | NHL repeat-containing protein                           | NPM_3297             | NLP_1924                                   | +                      | +                     | +                     | +                                       |
| Npun_R1274 | <i>scyC</i> | protein of unknown function                             | NPM_3298             | NLP_1923                                   | +                      | +                     | +                     | +                                       |
| Npun_R1275 | <i>scyB</i> | glutamate/leucine dehydrogenase                         | NPM_3299             | NLP_1922                                   | +                      | +                     | +                     | +                                       |
| Npun_R1276 | <i>scyA</i> | acetolactate synthase large subunit                     | NPM_3300             | NLP_1921                                   | +                      | +                     | +                     | +                                       |
| Npun_F1277 | —           | PAS/PAC sensor signal transduction histidine kinase     | NPM_3301             | NLP_1920                                   | +                      | +                     | +                     | +                                       |
| Npun_F1278 | <i>araC</i> | AraC family two component transcriptional regulator     | NPM_3302             | NLP_1919                                   | +                      | +                     | +                     | +                                       |
| Npun_F5232 | —           | protein of unknown function                             | NPM_5171             | NLP_5009                                   | +                      | +                     | +                     | +                                       |
| Npun_F5233 | —           | putative metal-dependent hydrolase                      | NPM_5170             | NLP_5010                                   | +                      | +                     | +                     | +                                       |
| Npun_F5234 | <i>ubiA</i> | UbiA family prenyltransferase                           | NPM_5169             | NLP_5011                                   | +                      | +                     | +                     | +                                       |
| Npun_F5235 | —           | protein of unknown function                             | NPM_5168             | NLP_5012                                   | +                      | +                     | +                     | +                                       |
| Npun_F5236 | —           | type I phosphodiesterase                                | NPM_5167             | NLP_5013                                   | +                      | +                     | +                     | +                                       |

**Table S7.** Number of transposase genes in the *Nostoc* sp. N6 and *Nostoc* sp. '*Lobaria pulmonaria* cyanobiont' genomes.

| Replicon                                             | Intact genes | Pseudogenes |
|------------------------------------------------------|--------------|-------------|
| <b><i>Nostoc</i> sp. N6</b>                          |              |             |
| chromosome                                           | 88           | 85          |
| pNPM1                                                | 3            | 2           |
| pNPM2                                                | 2            | 2           |
| pNPM3                                                | 0            | 1           |
| pNPM4                                                | 0            | 0           |
| pNPM5                                                | 1            | 0           |
| pNPM6                                                | 0            | 0           |
| pNPM7                                                | 0            | 0           |
| pNPM8                                                | 1            | 0           |
| pNPM9                                                | 2            | 0           |
| pNPM10                                               | 0            | 0           |
| Total                                                | 97           | 90          |
| <b><i>Nostoc</i> sp. '<i>Lobaria pulmonaria</i>'</b> |              |             |
| chromosome                                           | 29           | 114         |
| pNLP1                                                | 5            | 0           |
| pNLP2                                                | 1            | 4           |
| pNLP3                                                | 0            | 0           |
| pNLP4                                                | 0            | 0           |
| Total                                                | 35           | 118         |

**Table S8.** IS family composition of the *Nostoc* sp. N6 and *Nostoc* sp. '*Lobaria pulmonaria* cyanobiont' genomes.

| IS family          | Copy number          |                                            |
|--------------------|----------------------|--------------------------------------------|
|                    | <i>Nostoc</i> sp. N6 | <i>Nostoc</i> sp. ' <i>L. pulmonaria</i> ' |
| <i>IS110</i>       | 0                    | 1                                          |
| <i>IS1380</i>      | 1                    | 1                                          |
| <i>IS1595</i>      | 1                    | 0                                          |
| <i>IS1634</i>      | 22                   | 1                                          |
| <i>IS200/IS605</i> | 15                   | 8                                          |
| <i>IS4</i>         | 6                    | 6                                          |
| <i>IS5</i>         | 12                   | 1                                          |
| <i>IS630</i>       | 25                   | 3                                          |
| <i>IS701</i>       | 1                    | 5                                          |
| <i>ISAzo13</i>     | 5                    | 1                                          |
| <i>ISNCY</i>       | 0                    | 4                                          |
| <i>Tn3</i>         | 1                    | 0                                          |
| Undefined          | 8                    | 4                                          |
| Total              | 97                   | 35                                         |

**Table S9.** Intein-containing proteins encoded in the genome of *Nostoc* sp. N6

| <b>Locus tag</b> | <b>Mature protein</b>                | <b>Functional homolog without intein<br/>(% protein sequence identity/similarity)</b> |
|------------------|--------------------------------------|---------------------------------------------------------------------------------------|
| NPM_0997         | replicative DNA helicase DnaB        | NPM_1772 (55%/72%), NPM_1944 (56%/73%),<br>NPM_4704 (56%/73%), NPM_10102 (59%/78%)    |
| NPM_1656         | phosphoenolpyruvate synthase         | NPM_3568 (25%/46%), NPM_5130 (33%/46%)                                                |
| NPM_2566         | ribonucleoside-diphosphate reductase | –                                                                                     |
| NPM_2586         | tRNA-splicing ligase RtcB            | NPM_1543 (30%/43%)                                                                    |
| NPM_5024         | superfamily II DNA/RNA helicase      | –                                                                                     |

**Table S10.** Distribution of thymidilate synthase (*thyA/thyX*) genes among Cyanobacteria. Pseudogenes are denoted with an asterisk (\*).

| Strain                                          | <i>thyA</i> | <i>thyX</i> |
|-------------------------------------------------|-------------|-------------|
| <i>Nostoc</i> sp. N6                            | –           | +           |
| <i>Nostoc</i> sp. 210A                          | +           | +*          |
| <i>Nostoc</i> sp. 213                           | –           | +           |
| <i>Nostoc</i> sp. 232                           | –           | +           |
| <i>Nostoc</i> sp. ' <i>Lobaria pulmonaria</i> ' | +           | –           |
| <i>Nostoc</i> sp. ' <i>Peltigera malacea</i> '  | –           | +           |
| <i>Nostoc punctiforme</i>                       | –           | +           |
| <i>Nostoc</i> sp. KVJ20                         | –           | +           |
| <i>Nostoc</i> sp. PCC 7107                      | –           | +           |
| <i>Nostoc</i> sp. PCC 7120                      | –           | +           |
| <i>Nostoc</i> sp. PCC 7524                      | +           | –           |
| <i>Nostoc</i> sp. NIES-3756                     | +           | –           |
| <i>Anabaena variabilis</i> ATCC 29413           | –           | +           |
| <i>Anabaena</i> sp. PCC 7108                    | –           | +           |
| <i>Anabaena</i> sp. WA102                       | –           | +           |
| <i>Anabaena</i> sp. 90                          | +           | –           |
| <i>Anabaena cylindrica</i> PCC 7122             | +           | –           |
| <i>Trichormus azollae</i> 0708                  | +           | –           |
| <i>Calothrix</i> sp. PCC 7507                   | –           | +           |
| <i>Cyanothece</i> spp. (6 strains)              | +           | –           |
| <i>Cylindrospermum stagnale</i> PCC 7417        | +           | –           |
| <i>Gloeocapsa</i> sp. PCC 7428                  | +           | –           |
| <i>Microcoleus</i> sp. PCC 7113                 | –           | +           |
| <i>Microcystis</i> spp. (4 strains)             | +           | –           |
| <i>Nodularia spumigena</i> CCY9414              | –           | +           |
| <i>Pleurocapsa</i> sp. PCC 7327                 | +           | –           |
| <i>Rivularia</i> sp. PCC 7116                   | –           | +           |
| <i>Synechococcus</i> spp. (18 strains)          | –           | +           |

**Table S11.** Intervening sequences in ribonucleoside-diphosphate reductase *nrdJ* genes from *Nostoc* and *Anabaena* strains. Genes originally annotated as “pseudo” are denoted with an asterisk (\*).

| Strain                                          | Locus tag                                | Intervening sequence                                              |
|-------------------------------------------------|------------------------------------------|-------------------------------------------------------------------|
| <i>Nostoc</i> sp. N6                            | NPM_2566                                 | intein                                                            |
| <i>Nostoc</i> sp. 210A                          | —                                        | group I intron                                                    |
| <i>Nostoc</i> sp. 213                           | —                                        | intein                                                            |
| <i>Nostoc</i> sp. 232                           | —                                        | intein                                                            |
| <i>Nostoc</i> sp. ‘ <i>Lobaria pulmonaria</i> ’ | NLP_3546                                 | group I intron                                                    |
| <i>Nostoc</i> sp. ‘ <i>Peltigera malacea</i> ’  | —                                        | group I intron                                                    |
| <i>Nostoc punctiforme</i>                       | Npun_F2495*                              | group I intron                                                    |
| <i>Nostoc</i> sp. PCC 7107                      | Nos7107_2758                             | intein                                                            |
| <i>Nostoc</i> sp. PCC 7120                      | all4035                                  | intein                                                            |
| <i>Nostoc</i> sp. PCC 7524                      | Nos7524_1315                             | 2 inteins                                                         |
| <i>Anabaena variabilis</i> ATCC 29413           | Ava_1670                                 | —                                                                 |
| <i>Anabaena</i> sp. PCC 7108                    | Ana7108_0097                             | group I intron                                                    |
| <i>Anabaena</i> sp. 90                          | ANA_C12699,<br>ANA_C12700<br>ANA_C12701* | group II intron with<br>reverse-transcriptase/maturase,<br>intein |
| <i>Anabaena cylindrica</i> PCC 7122             | Anacy_1019*                              | group I intron, intein                                            |
| <i>Trichormus azollae</i> 0708                  | Aazo_1083                                | 2 inteins                                                         |

**Table S12.** Expression of phospholipases C and D by the *Peltigera membranacea* mycobiont

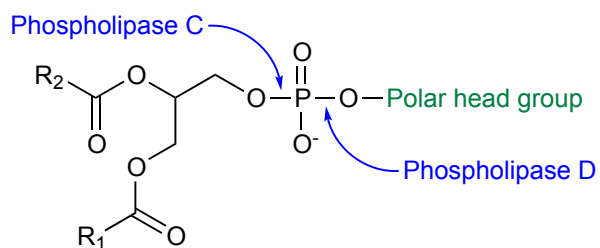

| Gene symbol  | Encoded protein                    | CDS  | RPKM values |                         |                            |
|--------------|------------------------------------|------|-------------|-------------------------|----------------------------|
|              |                                    |      | Gene        | Transcript with introns | Transcript without introns |
| <i>plc1</i>  | phospholipase C1                   | 78   | 64          | 63                      | 74                         |
| <i>plc2</i>  | phospholipase C2                   | 65   | 65          | 59                      | 59                         |
| <i>pld</i>   | phospholipase D                    | 122  | 103         | 95                      | 110                        |
| <i>tub-2</i> | $\beta$ -tubulin                   | 897  | 656         | 527                     | 658                        |
| <i>gpd-1</i> | glycerol-3-phosphate dehydrogenase | 1396 | 1019        | 789                     | 983                        |

**Table S13.** Gene clusters encoding glycolipid synthases, polyketide synthases (PKSs) and non-ribosomal peptide synthases (NRPSs) in the *Nostoc* sp. N6 and *Nostoc* sp. '*Lobaria pulmonaria*' cyanobiont' genomes.

| Gene cluster                                         | Type                | Size, kb | Gene cluster location                                      | Actual or predicted product       | Reference                                                                       |
|------------------------------------------------------|---------------------|----------|------------------------------------------------------------|-----------------------------------|---------------------------------------------------------------------------------|
| <b><i>Nostoc</i> sp. N6</b>                          |                     |          |                                                            |                                   |                                                                                 |
| <i>nos</i>                                           | NRPS-PKS            | 41.6     | NPM_0706-NPM_0718                                          | Nostopeptolide-like compound      | <a href="#">Hoffmann et al., 2003</a> ;<br><a href="#">Liaimer et al., 2015</a> |
| <i>ncp</i>                                           | NRPS                | 25.2     | NPM_1843-NPM_1844                                          | Nostocyclopeptide                 | <a href="#">Becker et al., 2004</a>                                             |
| <i>nsp</i>                                           | PKS-NRPS            | 59.5     | NPM_1889-NPM_1901                                          | Nosperin                          | <a href="#">Kampa et al., 2013</a>                                              |
| <i>nrps1</i>                                         | NRPS                | 5.5      | NPM_1940                                                   | Unknown                           |                                                                                 |
| <i>nrps2</i>                                         | NRPS                | 13.6     | NPM_2203-NPM_2206                                          | Unknown                           |                                                                                 |
| <i>nrps3</i>                                         | NRPS                | 46.1     | NPM_3792-NPM_3822                                          | Banyaside/suomilide-like compound | <a href="#">Liaimer et al., 2016</a>                                            |
| <i>nrps4</i>                                         | NRPS                | 8.0      | NPM_4088                                                   | Unknown                           |                                                                                 |
| <i>pks1</i>                                          | PKS                 | 27.2     | NPM_4996-NPM_5009                                          | Unknown                           |                                                                                 |
| <i>nrps5</i>                                         | NRPS                | 31.9     | NPM_5146-NPM_5156                                          | Unknown                           |                                                                                 |
| <i>hgl</i>                                           | glycolipid synthase | 17.9     | NPM_5725-NPM_5731                                          | Heterocyst glycolipid             | <a href="#">Campbell et al., 1997</a>                                           |
| <i>pks2</i>                                          | PKS-NRPS            |          | NPM_5829-NPM_5850                                          | Unknown                           |                                                                                 |
| <i>nrps6</i>                                         | NRPS                | 28.8     | NPM_6509-NPM_6523                                          | Unknown                           |                                                                                 |
| <b><i>Nostoc</i> sp. '<i>Lobaria pulmonaria</i>'</b> |                     |          |                                                            |                                   |                                                                                 |
| <i>nrps1</i>                                         | NRPS-PKS            | 74.8     | NLP_0287-NLP_0322                                          | Unknown                           |                                                                                 |
| <i>nrps2</i>                                         | NRPS-PKS            | 22.1     | NLP_0518-NLP_0525                                          | Unknown                           |                                                                                 |
| <i>hgl</i>                                           | glycolipid synthase | 18.1     | NLP_0851-NLP_0857                                          | Heterocyst glycolipid             | <a href="#">Campbell et al., 1997</a>                                           |
| <i>nrps3</i>                                         | NRPS                | 38.9     | NLP_2474-NLP_2487<br>(including microviridin gene cluster) | Cyanopeptolin                     | <a href="#">Rouge et al., 2008</a>                                              |
| <i>nrps4</i>                                         | NRPS                | 14.9     | NLP_3197-NLP_3205                                          | Unknown                           |                                                                                 |
| <i>nrps5</i>                                         | NRPS                | 29.1     | NLP_4430-NLP_4446                                          | Unknown                           |                                                                                 |
| <i>nrps6</i>                                         | NRPS                | 14.0     | NLP_20015-NLP_20018                                        | Unknown                           |                                                                                 |
| <i>nrps7</i>                                         | NRPS-PKS            | 14.3     | NLP_20030-NLP_20034                                        | Unknown                           |                                                                                 |



**Table S14.** Analysis of adenylation domains present in the non-ribosomal peptide synthases encoded in the the *Nostoc* sp. N6 and *Nostoc* sp. '*Lobaria pulmonaria* cyanobiont' genomes. Substrate specificity was determined using NRPSpredictor2 (<http://nrps.informatik.uni-tuebingen.de>; Röttig et al., 2011).

| Protein                       | Adenylation domain | Nonribosomal code | Predicted specificity (similarity to the nearest neighbor) |
|-------------------------------|--------------------|-------------------|------------------------------------------------------------|
| NPM_0709                      | 1                  | DVQFIAHVVK        | Pro (100%)                                                 |
|                               | 2                  | DAFFLGVTFK        | Ile (100%)                                                 |
| NPM_0710                      | 1                  | DVWHISLIDK        | Ser (100%)                                                 |
|                               | 2                  | DVQFIAHLAK        | Pro (100%)                                                 |
|                               | 3                  | DAWTIAAVCK        | Phe (90%)                                                  |
| NPM_0712<br>( <i>pseudo</i> ) | 1                  | DVQFIAHVAK        | Pro (90%)                                                  |
|                               | 2                  | DAWQFGLIDK        | Gln (100%)                                                 |
| NPM_1843<br>(NcpA)            | 1                  | DASTVAAVCK        | Tyr (100%)                                                 |
|                               | 2                  | DILQLGLIWK        | Gly (100%)                                                 |
|                               | 3                  | DAWQFGLIDK        | Gln (100%)                                                 |
| NPM_1844<br>(NcpB)            | 1                  | DVQFIAHVVK        | Pro (100%)                                                 |
|                               | 2                  | DVWHISLIDK        | Ser (100%)                                                 |
|                               | 3                  | DAFFLGVTFK        | Ile (100%)                                                 |
|                               | 4                  | DAWTIGAVCK        | Phe (100%)                                                 |
| NPM_1899<br>(NspC)            | 1                  | DILQLGLIWK        | Gly (100%)                                                 |
|                               | 2                  | DVQYIAQVIK        | Pro (80%)                                                  |
| NPM_1940<br>(truncated)       | 1                  | DASTVAAVCK        | Tyr (100%)                                                 |
|                               | 2                  | Not assigned      | Not assigned                                               |
| NPM_2203                      | 1                  | DAFTIAAVWK        | Phe (80%)                                                  |
| NPM_2204                      | 1                  | DAFFLGVTFK        | Ile (100%)                                                 |
| NPM_2206                      | 1                  | DAWFLGNVVK        | Leu (100%)                                                 |
| NPM_3792                      | 1                  | DAFFLGVTFK        | Ile (100%)                                                 |
| NPM_3801                      | 1                  | DVHFICLLVK        | Pro (60%)                                                  |
| NPM_4088                      | 1                  | DAHITTHVVK        | Tyr (60%)                                                  |
|                               | 2                  | DVQFIAHVVK        | Pro (100%)                                                 |
| NPM_5151                      | 1                  | DAFFLGVTFK        | Ile (100%)                                                 |
|                               | 2                  | DTEDIGSVVK        | Lys (70%)                                                  |
| NPM_5152                      | 1                  | DGLLIGAVFK        | Val (80%)                                                  |
| NPM_5153                      | 1                  | DLGAIGCVIK        | Asn (60%)                                                  |
|                               | 2                  | DLFNNALTYK        | Ala (100%)                                                 |
| NPM_5155                      | 1                  | DLGAIGCVIK        | Asn (60%)                                                  |
| NPM_5830                      | 1                  | DLFNNALTYK        | Ala (100%)                                                 |
| NPM_5834                      | 1                  | DLTKIGHVGK        | Asn (90%)                                                  |

*Continued on next page*

**Table S14.** (continued from previous page)

| Protein   | Adenylation domain    | Nonribosomal code                                                  | Predicted specificity (similarity to the nearest neighbor)         |
|-----------|-----------------------|--------------------------------------------------------------------|--------------------------------------------------------------------|
| NPM_5839  | 1                     | DIWEMVADDK                                                         | Ser (50%)                                                          |
| NPM_5842  | 1                     | Not assigned                                                       | Not assigned                                                       |
| NPM_5846  | 1                     | Not assigned                                                       | Not assigned                                                       |
| NPM_6522  | 1<br>2                | Not assigned<br>DVWHFSLIDK                                         | Not assigned<br>Ser (100%)                                         |
| NLP_0287  | 1                     | DLFNNALTYK                                                         | Ala (100%)                                                         |
| NLP_0293  | 1<br>2                | DLFNNALTYK<br>DVWHISLVDK                                           | Ala (100%)<br>Ser (100%)                                           |
| NLP_0295  | 1                     | DILQLGMIWK                                                         | Gly (100%)                                                         |
| NLP_0299  | 1                     | DVEEIGVVTK                                                         | Orn (100%)                                                         |
| NLP_0304  | 1<br>2                | DVWHISLVDK<br>DFWNIGMVHK                                           | Ser (100%)<br>Thr (100%)                                           |
| NLP_0305  | 1                     | DAPTLGAVNK                                                         | Bht (70%)                                                          |
| NLP_0518  | 1                     | DFWNIGMVHK                                                         | Thr (100%)                                                         |
| NLP_0520  | 1                     | DILQLGMIWK                                                         | Gly (100%)                                                         |
| NLP_0521  | 1                     | DAFWLGGTFK                                                         | Val (90%)                                                          |
| NLP_2485  | 1                     | DAFWLGGTFK                                                         | Val (90%)                                                          |
| NLP_2486  | 1<br>2<br>3<br>4<br>5 | DFWNIGMVHK<br>DAWFLGNVVK<br>DVENAGVVTK<br>DAWFLGNVVK<br>DASTIAAVCK | Thr (100%)<br>Leu (100%)<br>Aph (100%)<br>Leu (100%)<br>Tyr (100%) |
| NLP_2487  | 1                     | DAWQFGLIDK                                                         | Gln (100%)                                                         |
| NLP_3202  | 1                     | DFWNIGMVHK                                                         | Thr (100%)                                                         |
| NLP_3203  | 1                     | AGRFQG-DK                                                          | Ile (40%)                                                          |
| NLP_4431  | 1<br>2                | DPWATGCIDK<br>DVRHFALLAK                                           | Gln (60%)<br>Ser (60%)                                             |
| NLP_20015 | 1                     | DAWFLGNVVK                                                         | Leu (100%)                                                         |
| NLP_20017 | 1                     | DAFFLGVTFK                                                         | Ile (100%)                                                         |
| NLP_20018 | 1                     | DAFTIAAVWK                                                         | Phe (100%)                                                         |
| NLP_20031 | 1                     | DLYNLSLIWK                                                         | Cys (100%)                                                         |

## References

- Argüelles, J. C. (2000). Physiological roles of trehalose in bacteria and yeasts: a comparative analysis. *Archives of Microbiology* 174(4), 217–224.
- Balskus, E. P. and C. T. Walsh (2010). The genetic and molecular basis for sunscreen biosynthesis in Cyanobacteria. *Science* 329(5999), 1653–1656.
- Barbosa, L. C., A. J. Demuner, E. S. de Alvarenga, A. Oliveira, B. King-Díaz, and B. Lotina-Hennsen (2006). Phytogrowth- and photosynthesis-inhibiting properties of nostoclide analogues. *Pest Management Science* 62(3), 214–222.
- Becker, J. E., R. E. Moore, and B. S. Moore (2004). Cloning, sequencing, and biochemical characterization of the nostocyclopeptide biosynthetic gene cluster: molecular basis for imine macrocyclization. *Gene* 325, 35–42.
- Bergman, B. and L. Hällbom (1982). *Nostoc* of *Peltigera canina* when lichenized and isolated. *Canadian Journal of Botany* 60(10), 2092–2098.
- Bergman, B., A. Rai, and U. Rasmussen (2007). Cyanobacterial associations. In C. Elmerich and W. E. William Edward Newton (Eds.), *Associative and Endophytic Nitrogen-fixing Bacteria and Cyanobacterial Associations*, pp. 257–301. Springer.
- Black, T. A., Y. Cai, and C. P. Wolk (1993). Spatial expression and autoregulation of *hetR*, a gene involved in the control of heterocyst development in *Anabaena*. *Molecular Microbiology* 9(1), 77–84.
- Boissière, M.-C. (1987). Ultrastructural evidence for polyglucosidic reserves in *Nostoc* cells in *Peltigera* and *Collema* and the effect of thallus hydratation. *Bibliotheca Lichenologica* 25, 109–116.
- Bordenstein, S. and W. Reznikoff (2005). Mobile DNA in obligate intracellular bacteria. *Nature Reviews Microbiology* 3(9), 688–699.
- Bugg, T. and C. Walsh (1992). Intracellular steps of bacterial-cell wall peptidoglycan biosynthesis – enzymology, antibiotics, and antibiotic-resistance. *Natural Product Reports* 9(3), 199–215.
- Campbell, E., F. Wong, and J. Meeks (2003). DNA binding properties of the HrmR protein of *Nostoc punctiforme* responsible for transcriptional regulation of genes involved in the differentiation of hormogonia. *Molecular Microbiology* 47(2), 573–582.
- Campbell, E. L., M. F. Cohen, and J. C. Meeks (1997). A polyketide-synthase-like gene is involved in the synthesis of heterocyst glycolipids in *Nostoc punctiforme* strain ATCC 29133. *Archives of Microbiology* 167(4), 251–258.
- Chandler, M. and O. Fayet (1993). Translational frameshifting in the control of transposition in bacteria. *Molecular Microbiology* 7(4), 497–503.
- Chen, X., K. Schreiber, J. Appel, A. Makowka, B. Fährnich, M. Roettger, M. R. Hajirezaei, F. D. Sönnichsen, P. Schönheit, W. F. Martin, et al. (2016). The Entner–Doudoroff pathway is an overlooked glycolytic route in cyanobacteria and plants. *Proceedings of the National Academy of Sciences of the United States of America*, 201521916.
- Cohen, M. and J. Meeks (1997). A hormogonium regulating locus, *hrmUA*, of the cyanobacterium *Nostoc punctiforme* strain ATCC 29133 and its response to an extract of a symbiotic plant partner *Anthoceros punctatus*. *Molecular Plant-Microbe Interactions* 10(2), 280–289.

- Cohen, M. F., Y. Sakihama, Y. C. Takagi, T. Ichiba, and H. Yamasaki (2002). Synergistic effect of deoxyanthocyanins from symbiotic fern *Azolla* spp. on *hrmA* gene induction in the cyanobacterium *Nostoc punctiforme*. *Molecular Plant-Microbe Interactions* 15(9), 875–882.
- Cohen, M. F. and H. Yamasaki (2000). Flavonoid-induced expression of a symbiosis-related gene in the cyanobacterium *Nostoc punctiforme*. *Journal of Bacteriology* 182(16), 4644–4646.
- Crona, M., A. Hofer, J. Astorga-Wells, B.-M. Sjöberg, and F. Tholander (2015). Biochemical characterization of the split class ii ribonucleotide reductase from *Pseudomonas aeruginosa*. *PLOS One* 10(7), e0134293.
- Cundliffe, E. (1992). Self-protection mechanisms in antibiotic producers. In D. J. Chadwick and J. Whelan (Eds.), *Secondary metabolites: their function and evolution*, Volume 171, pp. 199–214. Wiley Chichester, UK.
- da Silva, N. M. V., T. M. Pereira, A. F. Filho, and T. Matsuura (2011). Taxonomic characterization and antimicrobial activity of actinomycetes associated with foliose lichens from the amazonian ecosystems. *Australian Journal of Basic and Applied Sciences* 5, 910–918.
- Daiyasu, H., K. Kuma, T. Yokoi, H. Morii, Y. Koga, and T. H (2005). A study of archaeal enzymes involved in polar lipid synthesis linking amino acid sequence information, genomic contexts and lipid composition. *Archaea* 1(6), 399–410.
- Dal Grande, F., I. Widmer, H. H. Wagner, and C. Scheidegger (2012). Vertical and horizontal photobiont transmission within populations of a lichen symbiosis. *Molecular Ecology* 21(13), 3159–3172.
- Dao, T., H. Linthorst, and R. Verpoorte (2011). Chalcone synthase and its functions in plant resistance. *Phytochemistry Reviews* 10(3), 397–412.
- Darling, A., B. Mau, F. Blattner, and N. Perna (2004). Mauve: Multiple alignment of conserved genomic sequence with rearrangements. *Genome Research* 14(7), 1394–1403.
- Díaz, E.-M., M. Sacristán, M.-E. Legaz, and C. Vicente (2009). Isolation and characterization of a cyanobacterium-binding protein and its cell wall receptor in the lichen *Peltigera canina*. *Plant Signaling & Behavior* 4(7), 598–603.
- Dijksterhuis, J., K. G. van Driel, M. G. Sanders, D. Molenaar, J. A. Houbraken, R. A. Samson, and E. P. Kets (2002). Trehalose degradation and glucose efflux precede cell ejection during germination of heat-resistant ascospores of *Talaromyces macrosporus*. *Archives of Microbiology* 178(1), 1–7.
- Dittmann, E., M. Gugger, K. Sivonen, and D. P. Fewer (2015). Natural product biosynthetic diversity and comparative genomics of the cyanobacteria. *Trends in Microbiology* 23(10), 642–652.
- Doehlemann, G., P. Berndt, and M. Hahn (2006). Trehalose metabolism is important for heat stress tolerance and spore germination of *Botrytis cinerea*. *Microbiology* 152(9), 2625–2634.
- Dwivedi, B., B. Xue, D. Lundin, R. A. Edwards, and M. Breitbart (2013). A bioinformatic analysis of ribonucleotide reductase genes in phage genomes and metagenomes. *BMC Evolutionary Biology* 13(33).
- Edgar, R. C. (2004). Muscle: multiple sequence alignment with high accuracy and high throughput. *Nucleic Acids Research* 32(5), 1792–1797.

- Ekman, M., S. Picossi, E. L. Campbell, J. C. Meeks, and E. Flores (2013). A *Nostoc punctiforme* sugar transporter necessary to establish a cyanobacterium-plant symbiosis. *Plant Physiology* 161(4), 1984–1992.
- Enderlin, C. and J. Meeks (1983). Pure culture and reconstitution of the *Anthoceros-Nostoc* symbiotic association. *Planta* 158(2), 157–165.
- Escartin, F., S. Skouloubris, U. Liebl, and H. Myllykallio (2008). Flavin-dependent thymidylate synthase X limits chromosomal DNA replication. *Proceedings of the National Academy of Sciences of the United States of America* 105(29), 9948–9952.
- Feoktistov, A., A. Kitashov, and E. Lobakova (2009). The characterization of lectins from the tripartite lichen *Peltigera aphthosa* (L.) Willd. *Moscow University Biological Sciences Bulletin* 64(1), 23–27.
- Filee, J., P. Siguier, and M. Chandler (2007). Insertion sequence diversity in Archaea. *Microbiology and Molecular Biology Reviews* 71(1), 121–157.
- Frangoul, L., P. Quillardet, A.-M. Castets, J.-F. Humbert, H. C. P. Matthijs, D. Cortez, A. Tolonen, C.-C. Zhang, S. Gribaldo, J.-C. Kehr, Y. Zilliges, N. Ziemert, S. Becker, E. Talla, A. Latifi, A. Billault, A. Lepelletier, E. Dittmann, C. Bouchier, and N. T. de Marsac (2008). Highly plastic genome of *Microcystis aeruginosa* PCC 7806, a ubiquitous toxic freshwater cyanobacterium. *BMC Genomics* 9.
- Freiberg, C., R. Fellay, A. Bairoch, W. J. Broughton, A. Rosenthal, and X. Perret (1997). Molecular basis of symbiosis between *Rhizobium* and legumes. *Nature* 387(6631), 394–401.
- Gao, Q. and F. Garcia-Pichel (2011). An ATP-grasp ligase involved in the last biosynthetic step of the iminomycosporine shinorine in *Nostoc punctiforme* ATCC 29133. *Journal of Bacteriology* 193(21), 5923–5928.
- Ghannoum, M. (2000). Potential role of phospholipases in virulence and fungal pathogenesis. *Clinical Microbiology Reviews* 13(1), 122–143.
- Giladi, M., G. Bitan-Banin, M. Mevarech, and R. Ortenberg (2002). Genetic evidence for a novel thymidylate synthase in the halophilic archaeon *Halobacterium salinarum* and in *Campylobacter jejuni*. *FEMS Microbiology Letters* 216(1), 105–109.
- Gleason, F. K. (1990). The natural herbicide, cyanobacterin, specifically disrupts thylakoid membrane structure in *Euglena gracilis* strain Z. *FEMS Microbiology Letters* 68(1-2), 77–81.
- Gleason, F. K. and C. A. Baxa (1986). Activity of the natural algicide, cyanobacterin, on eukaryotic microorganisms. *FEMS Microbiology Letters* 33(1), 85–88.
- Gleason, F. K. and D. E. Case (1986). Activity of the natural algicide, cyanobacterin, on angiosperms. *Plant Physiology* 80(4), 834–837.
- Gleason, F. K. and J. L. Paulson (1984). Site of action of the natural algicide, cyanobacterin, in the blue-green alga, *Synechococcus* sp. *Archives of Microbiology* 138(3), 273–277.
- Gogarten, J., A. Senejani, O. Zhaxybayeva, L. Olendzenski, and E. Hilario (2002). Inteins: structure, function, and evolution. *Annual Review of Microbiology* 56, 263–287.
- Golakoti, T., W. Y. Yoshida, S. Chaganty, and R. E. Moore (2001). Isolation and structure determination of nostocyclopeptides A1 and A2 from the terrestrial cyanobacterium *Nostoc* sp. ATCC53789. *Journal of Natural Products* 64(1), 54–59.

- Golecki, J. (1988). Analysis of the structure and development of bacterial membranes (outer, cytoplasmic and intracytoplasmic membranes). *Methods In Microbiology* 20, 61–77.
- González, I., A. Ayuso-Sacido, A. Anderson, and O. Genilloud (2005). Actinomycetes isolated from lichens: evaluation of their diversity and detection of biosynthetic gene sequences. *FEMS Microbiology Ecology* 54(3), 401–415.
- Hagemann, M. (2011). Molecular biology of cyanobacterial salt acclimation. *FEMS Microbiology Reviews* 35(1), 87–123.
- Hashimoto, M., T. Nonaka, and I. Fujii (2014). Fungal type III polyketide synthases. *Natural Product Reports* 31(10), 1306–1317.
- Hausner, G., M. Hafez, and D. R. Edgell (2014). Bacterial group I introns: mobile RNA catalysts. *Mobile DNA* 5(8).
- Healy, V., I. Lessard, D. Roper, J. Knox, and C. Walsh (2000). Vancomycin resistance in enterococci: reprogramming of the D-Ala-D-Ala ligases in bacterial peptidoglycan biosynthesis. *Chemistry and Biology* 7(5), R109–R119.
- Herdman, M. and R. Rippka (1988). Cellular-differentiation: hormogonia and baeocytes. *Methods In Enzymology* 167, 232–242.
- Hoffmann, D., J. M. Hevel, R. E. Moore, and B. S. Moore (2003). Sequence analysis and biochemical characterization of the nostopeptolide A biosynthetic gene cluster from *Nostoc* sp. GSV224. *Gene* 311, 171–180.
- Hounsa, C.-G., E. V. Brandt, J. Thevelein, S. Hohmann, and B. A. Prior (1998). Role of trehalose in survival of *Saccharomyces cerevisiae* under osmotic stress. *Microbiology* 144(3), 671–680.
- Iyer, L. M., S. Abhiman, A. M. Burroughs, and L. Aravind (2009). Amidoligases with ATP-grasp, glutamine synthetase-like and acetyltransferase-like domains: synthesis of novel metabolites and peptide modifications of proteins. *Molecular BioSystems* 5(12), 1636–1660.
- Izard, T. and J. Ellis (2000). The crystal structures of chloramphenicol phosphotransferase reveal a novel inactivation mechanism. *The EMBO Journal* 19(11), 2690–2700.
- Jayasimhulu, K., S. M. Hunt, E. S. Kaneshiro, Y. Watanabe, and J.-L. Giner (2007). Detection and identification of *Bacteriovorax stolpii* UKi2 sphingophosphonolipid molecular species. *Journal of the American Society for Mass Spectrometry* 18(3), 394–403.
- Johansson, C. and B. Bergman (1994). Reconstitution of the symbiosis of *Gunnera manicata* Linden: cyanobacterial specificity. *New Phytologist*, 643–652.
- Jurgens, U. and J. Weckesser (1985). The fine structure and chemical composition of the cell wall and sheath layers of cyanobacteria. *Annales de l'Institut Pasteur / Microbiologie* 136A(1), 41–44.
- Kaasalainen, U., D. P. Fewer, J. Jokela, M. Wahlsten, K. Sivonen, and J. Rikkinen (2012). Cyanobacteria produce a high variety of hepatotoxic peptides in lichen symbiosis. *Proceedings of the National Academy of Sciences of the United States of America* 109(15), 5886–5891.
- Kaasalainen, U., J. Jokela, D. P. Fewer, K. Sivonen, and J. Rikkinen (2009). Microcystin production in the tripartite cyanolichen *Peltigera leucophlebia*. *Molecular Plant-Microbe Interactions* 22(6), 695–702.

- Kacan, S. (2007). *Untersuchungen zur Produktion von Cyanobacterin, einem Toxin aus dem Cyanobakterium Scytonema hofmanni Ag. (UTEX1581) – anwendungsbezogene und ökologische Aspekte*. Ph. D. thesis, Universität Rostock.
- Kampa, A., A. N. Gagunashvili, T. A. M. Gulder, B. I. Morinaka, C. Daolio, M. Godejohann, V. P. W. Miao, J. Piel, and O. S. Andresson (2013). Metagenomic natural product discovery in lichen provides evidence for a family of biosynthetic pathways in diverse symbioses. *Proceedings of the National Academy of Sciences of the United States of America* 110(33), E3129–E3137.
- Kaneshiro, E. S., S. A. Hunt, and Y. Watanabe (2008). *Bacteriovorax stolpii* proliferation and predation without sphingophosphonolipids. *Biochemical and Biophysical Research Communications* 367(1), 21–25.
- Khamar, H. J., E. K. Breathwaite, C. E. Prasse, E. R. Fraley, C. R. Secor, F. L. Chibane, J. Elhai, and W.-L. Chiu (2010). Multiple roles of soluble sugars in the establishment of *Gunnera-Nostoc* endosymbiosis. *Plant Physiology* 154(3), 1381–1389.
- Kleiner, M., J. C. Young, M. Shah, N. C. VerBerkmoes, and N. Dubilier (2013). Metaproteomics reveals abundant transposase expression in mutualistic endosymbionts. *MBIO* 4(3).
- Kodani, S., K. Ishida, and M. Murakami (1999). Occurrence and identification of UDP-N-acetylmuramyl-pentapeptide from the cyanobacterium *Anabaena cylindrica*. *FEMS Microbiology Letters* 176(2), 321–325.
- Koriem, A. and V. Ahmadjian (1986). An ultrastructural-study of lichenized and cultured nostoc photobionts of *Peltigera canina*, *Peltigera rufescens*, and *Peltigera spuria*. *Endocytobiosis and Cell Research* 3(1), 65–78.
- Kraft, L., G. A. Sprenger, and Y. Lindqvist (2002). Conformational changes during the catalytic cycle of gluconate kinase as revealed by X-ray crystallography. *Journal of Molecular Biology* 318(4), 1057–1069.
- Kudo, F., A. Miyanaga, and T. Eguchi (2014). Biosynthesis of natural products containing  $\beta$ -amino acids. *Natural Product Reports* 31, 1056–1073.
- Kurtz, S., A. Phillippy, A. Delcher, M. Smoot, M. Shumway, C. Antonescu, and S. Salzberg (2004). Versatile and open software for comparing large genomes. *Genome Biology* 5(2).
- Leduc, D., S. Graziani, G. Lipowski, C. Marchand, P. Le Maréchal, U. Liebl, and H. Myllykallio (2004). Functional evidence for active site location of tetrameric thymidylate synthase X at the interphase of three monomers. *Proceedings of the National Academy of Sciences of the United States of America* 101(19), 7252–7257.
- Leduc, D., S. Graziani, L. Meslet-Cladiere, A. Sodolescu, U. Liebl, and H. Myllykallio (2004). Two distinct pathways for thymidylate (dTMP) synthesis in (hyper) thermophilic bacteria and archaea. *Biochemical Society Transactions* 32(2), 231–235.
- Lehr, H., G. Fleminger, and M. Galun (1995). Lectin from the lichen *Peltigera membranacea* (Ach.) Nyl.: characterization and function. *Symbiosis* 18(1), 1–13.
- Lehr, H., M. Galun, S. Ott, H.-M. Jahns, and G. Fleminger (2000). Cephalodia of the lichen *Peltigera apthosa* (L.) Willd. Specific recognition of the compatible photobiont. *Symbiosis* 29(4), 357–365.

- Liaimer, A., E. J. Helfrich, K. Hinrichs, A. Guljamow, K. Ishida, C. Hertweck, and E. Dittmann (2015). Nostopeptolide plays a governing role during cellular differentiation of the symbiotic cyanobacterium *Nostoc punctiforme*. *Proceedings of the National Academy of Sciences of the United States of America* 112(6), 1862–1867.
- Liaimer, A., J. B. Jensen, and E. Dittmann (2016). A genetic and chemical perspective on symbiotic recruitment of cyanobacteria of the genus *Nostoc* into the host plant *Blasia pusilla* L. *Frontiers in Microbiology* 7.
- Lin, S., S. Haas, T. Zemojtel, P. Xiao, M. Vingron, and R. Li (2011). Genome-wide comparison of cyanobacterial transposable elements, potential genetic diversity indicators. *Gene* 473(2), 139–149.
- Lockhart, C., P. Rowell, and W. Stewart (1978). Phytohaemagglutinins from the nitrogen-fixing lichens *Peltigera canina* and *P. polydactyla*. *FEMS Microbiology Letters* 3(3), 127–130.
- Mason, C., K. Edwards, R. Carlson, J. Pignatello, F. Gleason, and J. Wood (1982). Isolation of chlorine-containing antibiotic from the freshwater cyanobacterium *Scytonema hofmanni*. *Science* 215(4531), 400–402.
- Matsushashi, M., M. Furuyama, and B. Maruo (1969). Effect of inhibitors of bacterial cell wall synthesis on the growth of *Anabaena variabilis*, a blue-green alga. *Agricultural and Biological Chemistry* 33(12), 1758–1760.
- McIntosh, E. M., M. H. Gadsden, and R. H. Haynes (1986). Transcription of genes encoding enzymes involved in dna synthesis during the cell cycle of *Saccharomyces cerevisiae*. *Molecular and General Genetics* 204(3), 363–366.
- McIntosh, E. M. and R. H. Haynes (1984). Isolation of a *Saccharomyces cerevisiae* mutant strain deficient in deoxycytidylate deaminase activity and partial characterization of the enzyme. *Journal of Bacteriology* 158(2), 644–649.
- Meeks, J. (1998). Symbiosis between nitrogen-fixing cyanobacteria and plants – The establishment of symbiosis causes dramatic morphological and physiological changes in the cyanobacterium. *BioScience* 48(4), 266–276.
- Meeks, J. C. (2003). Symbiotic interactions between *Nostoc punctiforme*, a multicellular cyanobacterium, and the hornwort *Anthoceros punctatus*. *Symbiosis* 35(1-3), 55–71.
- Meeks, J. C. (2005). The genome of the filamentous cyanobacterium *Nostoc punctiforme*. what can we learn from it about free-living and symbiotic nitrogen fixation? In R. Palacios and W. E. Newton (Eds.), *Genomes and Genomics of Nitrogen-fixing Organisms*, Volume 3 of *Nitrogen Fixation: Origins, Applications, and Research Progress*, pp. 27–70. Springer.
- Meng, Q., Y. Zhang, and X.-Q. Liu (2007). Rare group I intron with insertion sequence element in a bacterial ribonucleotide reductase gene. *Journal of Bacteriology* 189(5), 2150–2154.
- Metcalf, W. W. and W. A. van der Donk (2009). Biosynthesis of phosphonic and phosphinic acid natural products. *Annual Review of Biochemistry* 78, 65–94.
- Millbank, J. (1977). The oxygen tension within lichen thalli. *New Phytologist* 79(3), 649–657.
- Moran, N. and G. Plague (2004). Genomic changes following host restriction in bacteria. *Current Opinion In Genetics and Development* 14(6), 627–633.



- Mosher, R. H., D. J. Camp, K. Yang, M. P. Brown, W. V. Shaw, and L. C. Vining (1995). Inactivation of chloramphenicol by *O*-phosphorylation a novel resistance mechanism in *Streptomyces venezuelae* ISP5230, a chloramphenicol producer. *Journal of Biological Chemistry* 270(45), 27000–27006.
- Myllykallio, H., G. Lipowski, D. Leduc, J. Filee, P. Forterre, and U. Liebl (2002). An alternative flavin-dependent mechanism for thymidylate synthesis. *Science* 297(5578), 105–107.
- Newton, I. L. G. and S. R. Bordenstein (2011). Correlations between bacterial ecology and mobile DNA. *Current Microbiology* 62(1), 198–208.
- Nilsson, M., U. Rasmussen, and B. Bergman (2006). Cyanobacterial chemotaxis to extracts of host and nonhost plants. *FEMS Microbiology Ecology* 55(3), 382–390.
- Ow, S. Y., J. Noirel, T. Cardona, A. Taton, P. Lindblad, K. Stensjö, and P. C. Wright (2008). Quantitative overview of N<sub>2</sub> fixation in *Nostoc punctiforme* ATCC 29133 through cellular enrichments and iTRAQ shotgun proteomics. *Journal of Proteome Research* 8(1), 187–198.
- Paquin, B., S. D. Kathe, S. A. Nierzwicki-Bauer, and D. A. Shub (1997). Origin and evolution of group I introns in cyanobacterial tRNA genes. *Journal of Bacteriology* 179(21), 6798–6806.
- Park, J. (1952). Uridine-5'-pyrophosphate derivatives. *Journal of Biological Chemistry* 194(2), 877–904.
- Parks, D. H., M. Imelfort, C. T. Skennerton, P. Hugenholtz, and G. W. Tyson (2015). Checkm: assessing the quality of microbial genomes recovered from isolates, single cells, and metagenomes. *Genome Research* 25(7), 1043–1055.
- Paulsrud, P., J. Rikkinen, and P. Lindblad (1998). Cyanobiont specificity in some *Nostoc*-containing lichens and in a *Peltigera aphthosa* photosymbiodeme. *New Phytologist* 139(3), 517–524.
- Paulsrud, P., J. Rikkinen, and P. Lindblad (2001). Field investigations on cyanobacterial specificity in *Peltigera aphthosa*. *New Phytologist* 152(1), 117–123.
- Pearce, J. and N. Carr (1969). The incorporation and metabolism of glucose by *Anabaena variabilis*. *Journal of General Microbiology* 54(3), 451–462.
- Pearson, L. A., E. Dittmann, R. Mazmouz, S. E. Ongley, P. M. D'Agostino, and B. A. Neilan (2016). The genetics, biosynthesis and regulation of toxic specialized metabolites of cyanobacteria. *Harmful Algae* 54, 98–111.
- Petit, P. (1982). Phytolectins from the nitrogen-fixing lichen *Peltigera horizontalis*: the binding pattern of primary protein extract. *New Phytologist* 91(4), 705–710.
- Petit, P., R. Lallemand, and D. Savoye (1983). Purified phytolectin from the lichen *Peltigera canina* var. *canina* which binds to the phycobiont cell walls and its use as cytochemical marker in situ. *New Phytologist* 94(1), 103–110.
- Picossi, S., E. Flores, and M. Ekman (2013). Diverse roles of the glcp glucose permease in free-living and symbiotic cyanobacteria. *Plant Signaling and Behavior* 8(12), e27416.
- Pignatello, J. J., J. Porwoll, R. E. Carlson, A. Xavier, F. K. Gleason, and J. M. Wood (1983). Structure of the antibiotic cyanobacterin, a chlorine-containing  $\gamma$ -lactone from the freshwater cyanobacterium *Scytonema hofmanni*. *The Journal of Organic Chemistry* 48(22), 4035–4038.

- Ran, L., J. Larsson, T. Vigil-Stenman, J. A. A. Nylander, K. Ininbergs, W.-W. Zheng, A. Lapidus, S. Lowry, R. Haselkorn, and B. Bergman (2010). Genome erosion in a nitrogen-fixing vertically transmitted endosymbiotic multicellular cyanobacterium. *PLOS One* 5(7).
- Rasmussen, U., C. Johansson, A. Renglin, C. Petersson, and B. Bergman (1996). A molecular characterization of the *Gunnere-Nostoc* symbiosis: comparison with *Rhizobium*- and *Agrobacterium*-plant interactions. *New Phytologist* 133(3), 391–398.
- Robert, X. and P. Gouet (2014). Deciphering key features in protein structures with the new endscript server. *Nucleic Acids Research* 42(W1), W320–W324.
- Röttig, M., M. H. Medema, K. Blin, T. Weber, C. Rausch, and O. Kohlbacher (2011). NRSPredictor2—a web server for predicting NRPS adenylation domain specificity. *Nucleic Acids Research* 39, W362–W367.
- Roungé, T. B., T. Rohrlack, T. Kristensen, and K. S. Jakobsen (2008). Recombination and selectional forces in cyanopeptolin NRPS operons from highly similar, but geographically remote *Planktothrix* strains. *BMC Microbiology* 8(141).
- Saeng-in, P., N. Kuncharoen, N. Chamroensaksri, and S. Tanasupawat (2015). Identification and antimicrobial activity of *Streptomyces* and *Actinoplanes* strains from lichens. *Journal of Applied Pharmaceutical Science* 5(1), 023–029.
- Scheurwater, E., C. W. Reid, and A. J. Clarke (2008). Lytic transglycosylases: bacterial space-making autolysins. *International Journal of Biochemistry and Cell Biology* 40(4), 586–591.
- Schmitz-Esser, S., T. Penz, A. Spang, and M. Horn (2011). A bacterial genome in transition – an exceptional enrichment of IS elements but lack of evidence for recent transposition in the symbiont *Amoebophilus asiaticus*. *BMC Evolutionary Biology* 11.
- Seigler, D. S. (2012). *Plant secondary metabolism*. Springer Science & Business Media.
- Seshime, Y., P. R. Juvvadi, I. Fujii, and K. Kitamoto (2005). Discovery of a novel superfamily of type III polyketide synthases in *Aspergillus oryzae*. *Biochemical and Biophysical Research Communications* 331(1), 253–260.
- Sievers, F., A. Wilm, D. Dineen, T. J. Gibson, K. Karplus, W. Li, R. Lopez, H. McWilliam, M. Remmert, J. Söding, J. D. Thompson, and D. G. Higgins (2011). Fast, scalable generation of high-quality protein multiple sequence alignments using Clustal Omega. *Molecular Systems Biology* 7(1), 539.
- Sigurbjörnsdóttir, M., Ó. Andrésson, and O. Vilhelmsson (2015). Analysis of the *Peltigera membranacea* metagenome indicates that lichen-associated bacteria are involved in phosphate solubilization. *Microbiology* 161(5), 989–996.
- Singh, R. S. and A. K. Walia (2014). Characteristics of lichen lectins and their role in symbiosis. *Symbiosis* 62(3), 123–134.
- Spiteller, P. and F. von Nussbaum (2005).  $\beta$ -amino acids in natural products. In E. Juaristi and V. Soloshonok (Eds.), *Enantioselective Synthesis Of  $\beta$ -Amino Acids* (Second ed.), pp. 19–92. John Wiley & Sons, Inc.
- Svanström, Å. and P. Melin (2013). Intracellular trehalase activity is required for development, germination and heat-stress resistance of *Aspergillus niger* conidia. *Research in Microbiology* 164(2), 91–99.

- Tang, L., I. Watanabe, and C. Liu (1990). Limited multiplication of symbiotic cyanobacteria of *Azolla* spp. on artificial media. *Applied and Environmental Microbiology* 56(11), 3623–3626.
- Torrents, E. (2014). Ribonucleotide reductases: essential enzymes for bacterial life. *Frontiers in Cellular and Infection Microbiology* 4.
- Tschermak-Woess, E. (1988). The algal partner. In M. Galun (Ed.), *CRC Handbook of Lichenology*, Volume I, pp. 39–92. CRC Press Inc., Boca Raton.
- Vining, L. and C. Stuttard (1995). Chloramphenicol. *Biotechnology* 28, 505–530.
- Vining, L. and D. Westlake (1984). Chloramphenicol: properties, biosynthesis, and fermentation. In E. Vandamme (Ed.), *Biotechnology of Industrial Antibiotics*, pp. 387–409. Marcel Dekker, New York, NY.
- von Nussbaum, F. and P. Spiteller (2006).  $\beta$ -amino acids in nature. In C. Schmuck and H. Wennemers (Eds.), *Highlights In Bioorganic Chemistry: Methods And Applications*, pp. 90–106. John Wiley & Sons, Inc.
- Watanabe, Y., M. Nakajima, T. Hoshino, K. Jayasimhulu, E. Brooks, and E. Kaneshiro (2001). A novel sphingophosphonolipid head group 1-hydroxy-2-aminoethyl phosphonate in *Bdellovibrio stolpii*. *Lipids* 36(5), 513–519.
- Waterhouse, A. M., J. B. Procter, D. M. A. Martin, M. Clamp, and G. J. Barton (2009). Jalview Version 2 – a multiple sequence alignment editor and analysis workbench. *Bioinformatics* 25(9), 1189–1191.
- Wu, H., Z. Hu, and X. Liu (1998). Protein trans-splicing by a split intein encoded in a split DnaE gene of *Synechocystis* sp. PCC6803. *Proceedings of the National Academy of Sciences of the United States of America* 95(16), 9226–9231.
- Yang, X., Y. Shimizu, J. R. Steiner, and J. Clardy (1993). Nostoclides I and II, extracellular metabolites from a symbiotic cyanobacterium, *Nostoc* sp., from the lichen *Peltigera canina*. *Tetrahedron Letters* 34(5), 761–764.
- Yu, X., J. R. Doroghazi, S. C. Janga, J. K. Zhang, B. Circello, B. M. Griffin, D. P. Labeda, and W. W. Metcalf (2013). Diversity and abundance of phosphonate biosynthetic genes in nature. *Proceedings of the National Academy of Sciences of the United States of America* 110(51), 20759–20764.
- Zhu, T., S. Hou, X. Lu, and W. R. Hess (2017). Draft genome sequences of nine cyanobacterial strains from diverse habitats. *Genome Announcements* 5(9), e01676–16.
